# Supplementary material for: Palladium-catalyzed ortho-selective C–H hydroxylation of carboxybenzyl-protected benzylamines
Source: Royal Society of Chemistry journal article supplement (doi:10.1039/c9qo01523j), 2020-01-01

# Palladium-Catalyzed *ortho*-Selective C–H Hydroxylation of Carboxybenzyl-Protected Benzylamines

Chenyang Dai, Yi Han, Lingling Liu, Zhi-Bin Huang, Da-Qing Shi\* and Yingsheng Zhao\*  
Key Laboratory of Organic Synthesis of Jiangsu Province, College of Chemistry, Chemical  
Engineering and Materials Science Soochow University, Suzhou 215123 (PR China)

## *Supporting Information*

### Table of Contents

|                                                                                       |     |
|---------------------------------------------------------------------------------------|-----|
| 1. Reagents.....                                                                      | S2  |
| 2. Instruments .....                                                                  | S2  |
| 3. Procedure for preparation of <b>1a-1u</b> .....                                    | S2  |
| 4. General procedures for <i>ortho</i> -hydroxylation of benzylamine derivatives..... | S2  |
| 5. Gram scale reaction of <b>2a</b> .....                                             | S3  |
| 6. Further Transformation.....                                                        | S3  |
| 7. Isotopic Labelling Studies .....                                                   | S6  |
| 8. Kinetic isotope effect .....                                                       | S8  |
| 9. Spectroscopic Data of All New Compounds.....                                       | S10 |
| 10. <sup>1</sup> H NMR and <sup>13</sup> C NMR spectra .....                          | S22 |

**1. Reagents:** Unless otherwise noted, all reagents were purchased from Acros, Alfa, Adamas and used without further purification. Column chromatography purifications were performed using 200–300 mesh silica gel.

**2. Instruments:** NMR spectra were recorded on Varian Inova-400 MHz, Inova-300 MHz, Bruker DRX-400 or Bruker DRX-500 instruments and calibrated using residual solvent peaks as internal reference. Multiplicities are recorded as: s = singlet, d = doublet, t = triplet, dd = doublet of doublets, m = multiplet. HRMS analysis were carried out using TOF-MS instrument with EI source.

### 3. Procedure for preparation of 1a-1u

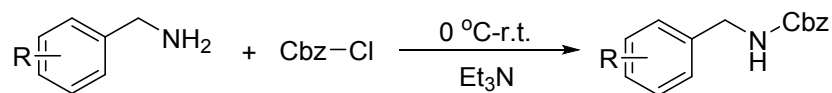

A solution of amine derivatives (10 mmol) and Et<sub>3</sub>N (1.4 ml, 13 mmol) in CH<sub>2</sub>Cl<sub>2</sub> (10 mL) was added dropwise to a solution of benzyl chloroformate (1.6 ml, 13 mmol) in CH<sub>2</sub>Cl<sub>2</sub> (20 mL) at 0 °C. The solution was warmed to room temperature and stirred over night. Then, the reaction was quenched by water (20 mL). The organic layer was separated and extracted with NaHCO<sub>3</sub> saturated solution (20 mL × 3), and then dried over anhydrous Na<sub>2</sub>SO<sub>4</sub>. Evaporation and column chromatography on silica gel afforded corresponding amide substrates as white solid with >90% yield.

### 4. General procedures for ortho-hydroxylation of benzylamine derivatives.

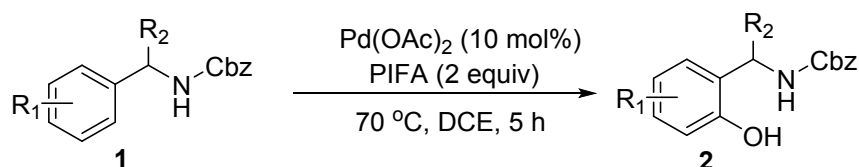

A mixture of **1** (0.2 mmol), PIFA (172 mg, 0.4 mmol), Pd(OAc)<sub>2</sub> (4.5 mg, 10 mol%) and 2 mL DCE in a 15 mL sealed glass vial was heated at 70 °C under air with vigorous

stirring for 5 hours. The reaction mixture was

cooled to room temperature, and diluted with ethyl acetate and filtered through celite. The filtrate was concentrated in vacuo and purified by column chromatography on silica gel (Ethyl acetate/Petroleum ether = 1:20 to 1:10) to give the corresponding product.

## 5. Gram scale reaction of **3c**

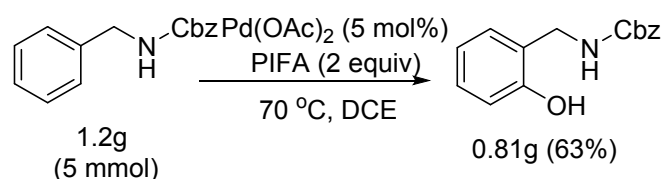

A mixture of **1a** (1.2 g, 5 mmol), PIFA (10 mmol), Pd(OAc)<sub>2</sub> (56.1 mg, 5 mol%) and 40 mL DCE in a 100 mL round-bottom flask was heated at 70 °C under air with vigorous stirring for 8 hours. The reaction mixture was cooled to room temperature, and diluted with ethyl acetate and filtered through celite. The filtrate was concentrated in vacuo and purified by column chromatography on silica gel (Ethyl acetate/Petroleum ether = 1:25 to 1:10) to give the corresponding product (0.81 g).

## 6. Further Transformation.

### (a) Preparation of **3**.

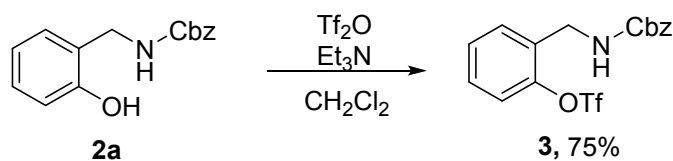

To a solution of **2a** (51.4 mg, 0.2 mmol) and Et<sub>3</sub>N (50.6 mg, 0.5 mmol) in DCM (5 mL), Tf<sub>2</sub>O (84.6 mg, 0.3 mmol) was added dropwise at 0 °C under nitrogen. After 1 h at 0 °C, the solution was stirred for 12 h at room temperature, and was then extracted with DCM (10 mL × 3). The combined organic phases were concentrated under vacuum, and purified by column chromatography on silica gel to give the corresponding product **3**.

### (b) Preparation of 4.

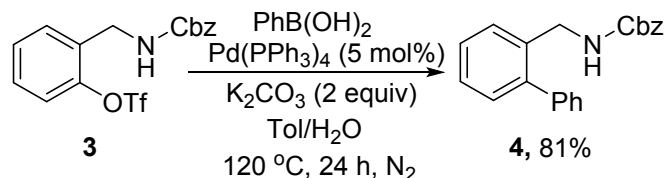

A mixture of **3** (77.8 mg, 0.2 mmol), PhB(OH)<sub>2</sub> (36.6 mg, 0.3 mmol), Pd(PPh<sub>3</sub>)<sub>4</sub> (11.6 mg, 5 mol %), toluene (1.6 mL), H<sub>2</sub>O (0.4 mL) and K<sub>2</sub>CO<sub>3</sub> (55.2 mg, 0.4 mmol) in a 15 mL sealed glass vial was heated at 120 °C under nitrogen with vigorous stirring for 24 hours. The reaction mixture was cooled to room temperature, and diluted with ethyl acetate and filtered through celite. The organic phases were washed with brine, dried over anhydrous Na<sub>2</sub>SO<sub>4</sub>, and concentrated under vacuum, and the residue purified by column chromatography on silica gel to give the corresponding product **4**.

### (c) Preparation of 5.

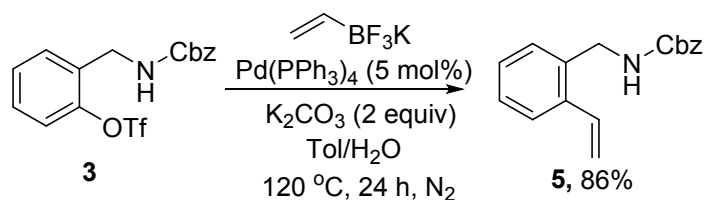

A mixture of **3** (77.8 mg, 0.2 mmol), potassium vinyltrifluoroborate (40.2 mg, 0.3 mmol), Pd(PPh<sub>3</sub>)<sub>4</sub> (11.6 mg, 5 mol %), toluene (1.6 mL), H<sub>2</sub>O (0.4 mL) and K<sub>2</sub>CO<sub>3</sub> (55.2 mg, 0.4 mmol) in a 15 mL sealed glass vial was heated at 120 °C under nitrogen with vigorous stirring for 24 hours. The reaction mixture was cooled to room temperature, and diluted with ethyl acetate and filtered through celite. The organic phases were washed with brine, dried over anhydrous Na<sub>2</sub>SO<sub>4</sub>, and concentrated under vacuum, and the residue purified by column chromatography on silica gel to give the corresponding product **5**.

#### (d) Preparation of 7.

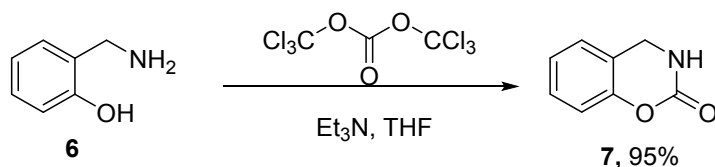

To a solution of **6** (24.6 mg, 0.2 mmol) and  $\text{Et}_3\text{N}$  (50.5 mg, 0.5 mmol) in anhydrous dichloromethane (5 mL),  $\text{CO}(\text{OCCl}_3)_2$  (29.7 mg, 0.3 mmol) was added dropwise under nitrogen. The solution was stirred for 2 h at 0 °C, then the solution was stirred for 12 h at rt and extracted with DCM (10 mL  $\times$  3). The combined organic phases were concentrated under vacuum, and purified by column chromatography on silica gel to give the corresponding product **7**.

#### (e) Preparation of 8.

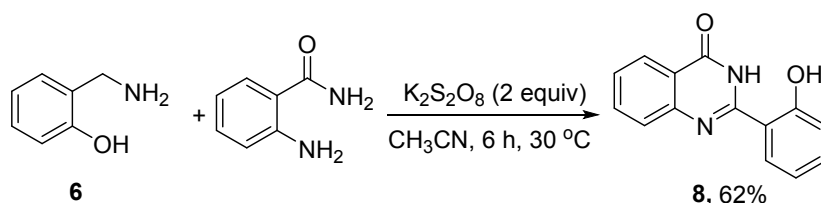

A mixture of **6** (61.5 mg, 0.5 mmol), anthranilamide (68 mg, 0.5 mmol),  $\text{K}_2\text{S}_2\text{O}_8$  (270 mg, 1 mmol) and 1 mL  $\text{CH}_3\text{CN}$  in a 15 mL sealed glass vial was heated at 30 °C under air with vigorous stirring for 6 hours. After the completion of reaction, the reaction mixture was dried on rotator evaporator, dissolved in ethyl acetate and washed with  $\text{H}_2\text{O}$  (3 times). The combined organic phases were concentrated under vacuum, and purified by column chromatography on silica gel to give the corresponding product **8**.

#### (f) Preparation of 9.

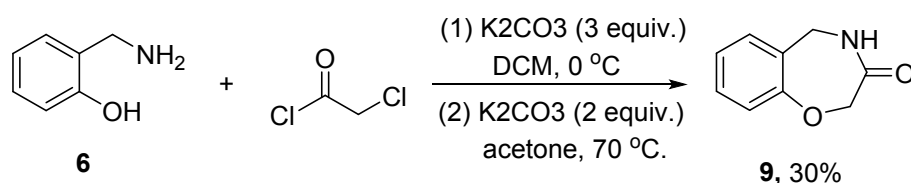

To a stirred mixture of **6** (61.5 mg, 0.5 mmol) and  $K_2CO_3$  (207 mg, 1.5 mmol) in 15 mL  $CH_2Cl_2$  was added dropwise chloroacetyl chloride (62.1 mg, 0.55 mmol) at 0 °C. After being stirred for 30 min, the reaction mixture was diluted with DCM and washed with brine. After being dried over  $Na_2SO_4$ , removal of the solvent in vacuo gave a residue. A mixture of this residue and  $K_2CO_3$  (138 mg, 1.0 mmol) in 20 mL acetone was heated at reflux for 6 h. The reaction mixture was concentrated in vacuo, and then a residue was dissolved into DCM and water, The organic phases were dried over anhydrous  $Na_2SO_4$ , and concentrated under vacuum, and the residue purified by column chromatography on silica gel to give the corresponding product **9**.

### (g) Preparation of **10**.

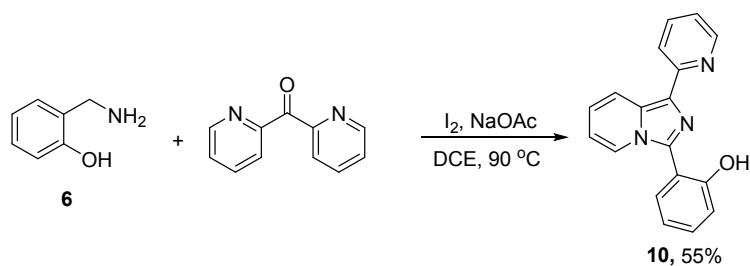

A mixture of **6** (67.6 mg, 0.55 mmol), 2-pyridyl ketone (92 mg, 0.5 mmol), molecular iodine (152 mg, 0.6 mmol), NaOAc (123 mg, 1.5 mmol) and 5 mL DCE in a 15 mL sealed glass vial was heated at 90 °C under air with vigorous stirring for 12 hours. the reaction mixture was allowed to cool down to room temperature, quenched with 5%  $Na_2S_2O_3$  (5 mL) and  $H_2O$  (15 mL), and extracted with DCM (10 mL  $\times$  3). The organic phases were dried over anhydrous  $Na_2SO_4$ , and concentrated under vacuum, and the residue purified by column chromatography on silica gel to give the corresponding product **10**.

## 7. Isotopic Labelling Studies

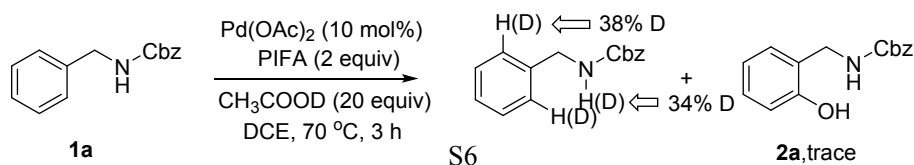

A mixture of **1a** (0.2 mmol), PIFA (0.4 mmol), Pd(OAc)<sub>2</sub> (4.5 mg, 10 mol%), 2 mL DCE and deuterium acetate (20 equiv) in a 15 mL sealed glass vial was heated at 70 °C under air with vigorous stirring for 3 hours. The reaction mixture was cooled to room temperature, and diluted with ethyl acetate and filtered through celite. The filtrate was concentrated in vacuo and purified by column chromatography on silica gel to give the corresponding product.

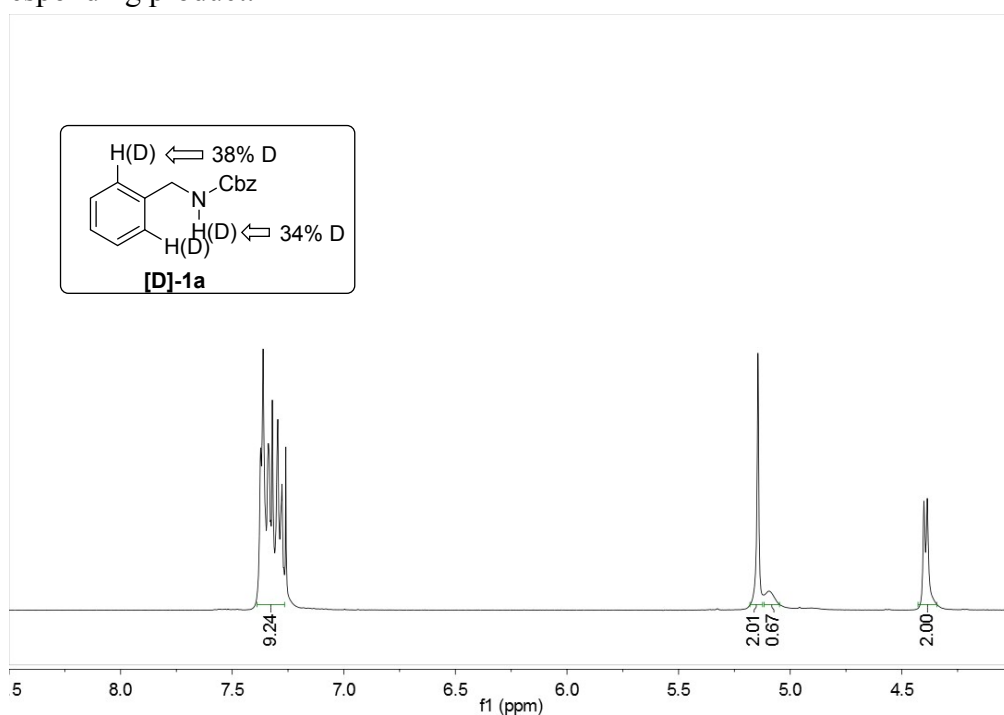

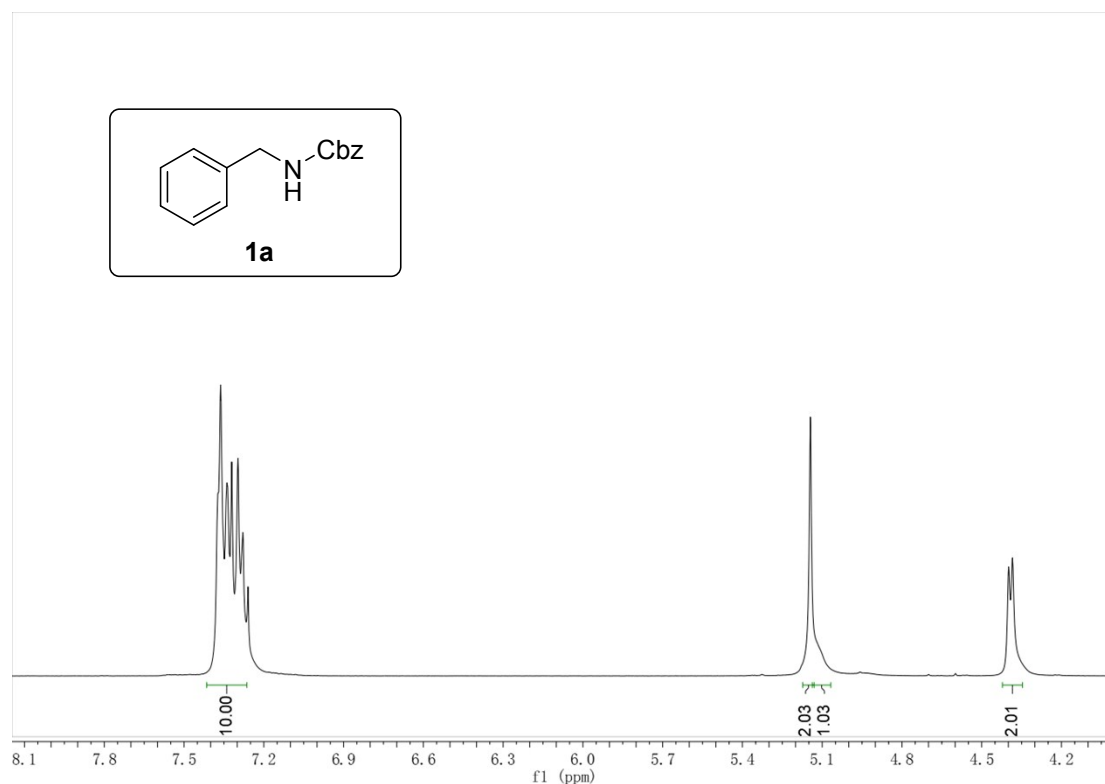

## 8. Kinetic isotope effect

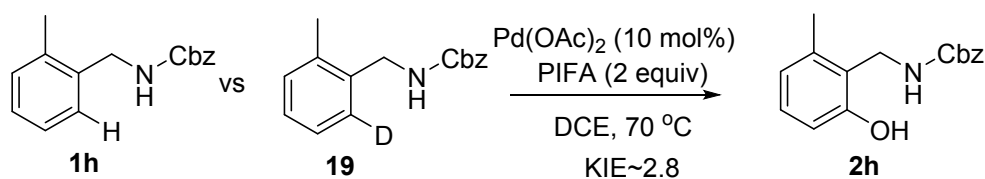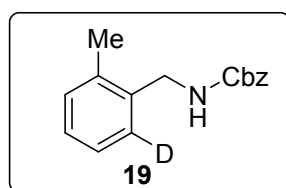

**19**  $^1\text{H}$  NMR (400 MHz,  $\text{CDCl}_3$ )  $\delta$  7.38 – 7.31 (m, 5H), 7.20 – 7.15 (m, 3H), 5.14 (s, 2H), 4.91 (s, 1H), 4.39 (d,  $J = 5.7$  Hz, 2H), 2.33 (s, 3H).

**Kinetic isotope effect:** A mixture of **1h** (51.0 mg, 0.2 mmol) or **19** (51.2 mg, 0.2 mmol), PIFA (172 mg, 0.4 mmol),  $\text{Pd}(\text{OAc})_2$  (4.5 mg, 10 mol%) and DCE (2.0 mL) in a 15 mL sealed glass vial was heated at 70 °C under air with vigorous stirring for 10, 20, 40, 60 minutes respectively. The yields were determined by GC using tridecane as internal standard.



| Time(min) | Yield(H) (%) | Yield(D) (%) |
|-----------|--------------|--------------|
| 10        | 5.1          | 2.2          |
| 20        | 9.3          | 3.1          |
| 40        | 21.2         | 7.5          |
| 60        | 29.2         | 10.6         |

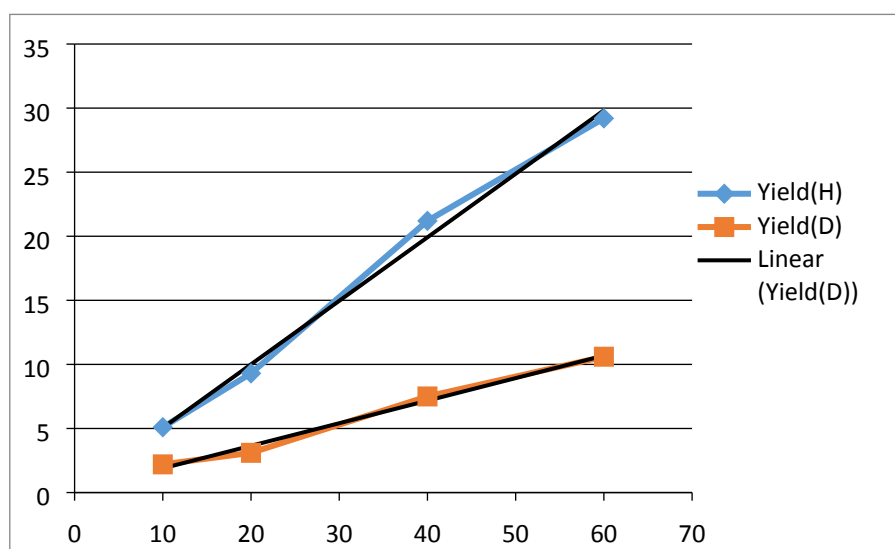

KIE=2.8

## Spectroscopic Data of All New Compounds

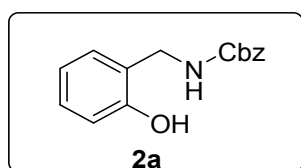

Pale yellow solid; Yield (70%, 35.9 mg); m. p. 50-51 °C; IR (neat,  $\text{cm}^{-1}$ ) 3328, 2921, 1680, 1520, 1254, 1137, 1060, 960, 749, 695;  $^1\text{H}$  NMR (400 MHz,  $\text{CDCl}_3$ )  $\delta$  7.38 (s, 1H), 7.36 – 7.32 (m, 5H), 7.24 – 7.18 (m, 1H), 7.10 (d,  $J = 7.4$  Hz, 1H), 6.95 (d,  $J = 7.9$  Hz, 1H), 6.88 – 6.82 (m, 1H), 5.56 (s, 1H), 5.13 (s, 2H), 4.30 (d,  $J = 6.6$  Hz, 2H).  $^{13}\text{C}$  NMR (101 MHz,  $\text{CDCl}_3$ )  $\delta$  158.7, 155.4, 135.8, 130.7, 129.9, 128.7, 128.5, 128.3, 124.6, 120.3, 117.6, 67.8, 41.5. HRMS Calcd for  $\text{C}_{15}\text{H}_{15}\text{NO}_3$  [ $\text{M}+\text{Na}^+$ ]: 280.0950; Found: 280.0945. Purified by column chromatography on silica gel (Ethyl acetate/Petroleum ether = 1:8 to 1:5).

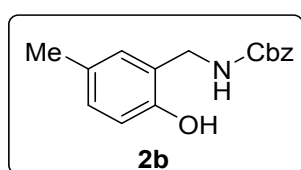

Pale yellow solid; Yield (71%, 38.5 mg); m. p. 91-93 °C; IR (neat,  $\text{cm}^{-1}$ ) 3340, 2918, 1649, 1522, 1466, 1249, 1041, 775, 743, 696;  $^1\text{H}$  NMR (400 MHz,  $\text{CDCl}_3$ )  $\delta$  8.21 (s, 1H), 7.39 – 7.29 (m, 5H), 7.03 – 6.99 (m, 1H), 6.89 (d,  $J = 1.9$  Hz, 1H), 6.84 (d,  $J = 8.2$  Hz, 1H), 5.45 (s, 1H), 5.12 (s, 2H), 4.26 (d,  $J = 6.7$  Hz, 2H), 2.25 (s, 3H).  $^{13}\text{C}$  NMR (101 MHz,  $\text{CDCl}_3$ )  $\delta$  158.6, 153.1, 135.9, 131.1, 130.4, 129.5, 128.7, 128.5, 128.3, 124.4, 117.6, 67.8, 41.5, 20.4. HRMS Calcd for  $\text{C}_{16}\text{H}_{17}\text{NO}_3$  [ $\text{M}+\text{Na}^+$ ]: 294.1106; Found: 294.1118.

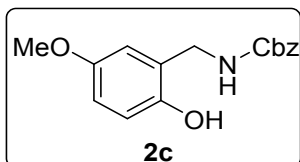

Pale yellow solid; Yield (67%, 38.4 mg); m. p. 84-86 °C; IR (neat,  $\text{cm}^{-1}$ ) 3329, 2938, 1672, 1497, 1253, 1200, 1137, 1045, 743, 697;  $^1\text{H}$  NMR (400 MHz,  $\text{CDCl}_3$ )  $\delta$  8.06 (s, 1H), 7.38 – 7.30 (m, 5H), 6.88 (d,  $J = 8.7$  Hz, 1H), 6.79 – 6.73 (m, 1H), 6.65 (d,  $J = 3.0$  Hz, 1H), 5.53 (s, 1H), 5.12 (s, 2H), 4.26 (d,  $J = 6.6$  Hz, 2H), 3.74 (s, 3H).  $^{13}\text{C}$  NMR (101 MHz,  $\text{CDCl}_3$ )  $\delta$  158.6, 153.3, 149.2, 135.8, 128.7, 128.5, 128.4, 125.4, 118.5, 115.9, 115.0, 67.8, 55.9, 41.6. HRMS Calcd for  $\text{C}_{16}\text{H}_{17}\text{NO}_4$  [ $\text{M}+\text{Na}^+$ ]: 310.1055; Found: 310.1060. Purified by column chromatography on silica gel (Ethyl acetate/Petroleum ether = 1:8 to 1:5).

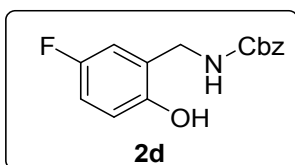

White solid; Yield (43%, 23.6 mg); m. p. 99-100 °C; IR (neat,  $\text{cm}^{-1}$ ) 3364, 2918, 2848, 1666, 1535, 1493, 1287, 1200, 1154, 992, 891, 727, 687;  $^1\text{H}$  NMR (400 MHz,  $\text{CDCl}_3$ )  $\delta$  8.37 (s, 1H), 7.36 – 7.32 (m, 5H), 6.91 – 6.87 (m, 2H), 6.82 – 6.78 (m, 1H), 5.48 (s, 1H), 5.13 (s, 2H), 4.25 (d,  $J = 6.7$  Hz, 2H).  $^{13}\text{C}$  NMR (101 MHz,  $\text{CDCl}_3$ )  $\delta$  158.7, 156.5 (d,  $J = 238.2$  Hz), 151.5 (d,  $J = 4.5$  Hz), 135.7, 128.7, 128.5, 128.4, 125.7 (d,  $J = 6.8$  Hz), 118.8 (d,  $J = 5.8$  Hz), 116.5 (d,  $J = 22.9$  Hz), 116.2 (d,  $J = 24.6$  Hz), 67.9, 41.2.  $^{19}\text{F}$  NMR (376 MHz,  $\text{CDCl}_3$ )  $\delta$  -124.6. HRMS Calcd for  $\text{C}_{15}\text{H}_{14}\text{FNO}_3$  [ $\text{M}+\text{Na}^+$ ]: 298.0855; Found: 298.0867. Purified by column chromatography on silica gel (Ethyl acetate/Petroleum ether = 1:8 to 1:5).

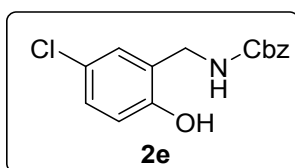

Pale yellow solid; Yield (53%, 30.8 mg); m. p. 89-90 °C; IR (neat,  $\text{cm}^{-1}$ ) 3330, 2801, 1661, 1541, 1486, 1289, 1262, 1222, 1115, 731, 695, 651;  $^1\text{H}$  NMR (400 MHz,  $\text{CDCl}_3$ )

$\delta$  8.62 (s, 1H), 7.39 – 7.30 (m, 5H), 7.17 – 7.12 (m, 1H), 7.06 (d,  $J$  = 2.6 Hz, 1H), 6.86 (d,  $J$  = 8.3 Hz, 1H), 5.54 (s, 1H), 5.13 (s, 2H), 4.24 (d,  $J$  = 6.6 Hz, 2H).  $^{13}\text{C}$  NMR (101 MHz,  $\text{CDCl}_3$ )  $\delta$  153.6, 135.0, 129.6, 129.1, 128.1, 128.0, 127.8, 125.5, 124.1, 118.6, 67.4, 40.6. HRMS Calcd for  $\text{C}_{15}\text{H}_{14}\text{ClNO}_3$  [ $\text{M}+\text{Na}^+$ ]: 314.0560; Found: 314.0559. Purified by column chromatography on silica gel (Ethyl acetate/Petroleum ether = 1:8 to 1:5).

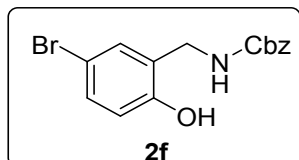

Yellow solid; Yield (51%, 34.2 mg); m. p. 87-89 °C; IR (neat,  $\text{cm}^{-1}$ ) 3345, 2918, 1646, 1524, 1466, 1283, 1248, 1040, 776, 747, 691;  $^1\text{H}$  NMR (400 MHz,  $\text{CDCl}_3$ )  $\delta$  8.69 (s, 1H), 7.37 – 7.31 (m, 5H), 7.30 – 7.27 (m, 1H), 7.20 (d,  $J$  = 2.5 Hz, 1H), 6.82 (d,  $J$  = 8.5 Hz, 1H), 5.52 (s, 1H), 5.13 (s, 2H), 4.23 (d,  $J$  = 6.7 Hz, 2H).  $^{13}\text{C}$  NMR (101 MHz,  $\text{CDCl}_3$ )  $\delta$  158.8, 154.8, 135.6, 133.1, 132.7, 128.7, 128.6, 128.4, 126.7, 119.7, 111.8, 68.0, 41.1. HRMS Calcd for  $\text{C}_{15}\text{H}_{14}\text{BrNO}_3$  [ $\text{M}+\text{Na}^+$ ]: 358.0055; Found: 358.0072. Purified by column chromatography on silica gel (Ethyl acetate/Petroleum ether = 1:8 to 1:5).

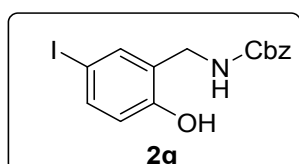

Pale yellow solid; Yield (60%, 46.0 mg); m. p. 110-112 °C; IR (neat,  $\text{cm}^{-1}$ ) 3328, 2919, 2794, 1657, 1542, 1279, 1259, 1226, 1110, 955, 821, 758, 697;  $^1\text{H}$  NMR (400 MHz,  $\text{CDCl}_3$ )  $\delta$  8.76 (s, 1H), 7.51 – 7.46 (m, 1H), 7.40 (d,  $J$  = 2.2 Hz, 1H), 7.39 – 7.34 (m, 5H), 6.74 (d,  $J$  = 8.5 Hz, 1H), 5.50 (s, 1H), 5.15 (s, 2H), 4.24 (d,  $J$  = 6.7 Hz, 2H).  $^{13}\text{C}$  NMR (101 MHz,  $\text{CDCl}_3$ )  $\delta$  158.8, 155.5, 139.0, 138.6, 135.6, 128.7, 128.6, 128.3, 127.3, 120.2, 81.6, 68.0, 40.9. HRMS Calcd for  $\text{C}_{15}\text{H}_{14}\text{INO}_3$  [ $\text{M}+\text{Na}^+$ ]: 405.9916; Found: 405.9929. Purified by column chromatography on silica gel (Ethyl acetate/Petroleum ether = 1:6 to 1:5).

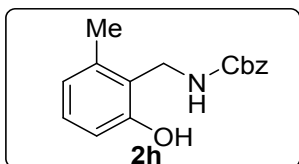

Pale yellow solid; Yield (61%, 33.1 mg); m. p. 106-109 °C; IR (neat,  $\text{cm}^{-1}$ ) 3342, 2952, 1644, 1530, 1466, 1251, 1045, 779, 748, 690;  $^1\text{H}$  NMR (400 MHz,  $\text{CDCl}_3$ )  $\delta$  8.47 (s, 1H), 7.39 – 7.30 (m, 5H), 7.13 – 7.07 (m, 1H), 6.83 (d,  $J = 8.0$  Hz, 1H), 6.74 (d,  $J = 7.5$  Hz, 1H), 5.47 (s, 1H), 5.11 (s, 2H), 4.36 (d,  $J = 6.6$  Hz, 2H), 2.33 (s, 3H).  $^{13}\text{C}$  NMR (101 MHz,  $\text{CDCl}_3$ )  $\delta$  158.8, 155.8, 137.6, 135.8, 129.3, 128.7, 128.5, 128.4, 123.7, 122.4, 116.0, 67.9, 37.1, 19.7. HRMS Calcd for  $\text{C}_{16}\text{H}_{17}\text{NO}_3$  [ $\text{M}+\text{Na}^+$ ]: 294.1106; Found: 294.1109. Purified by column chromatography on silica gel (Ethyl acetate/Petroleum ether = 1:10 to 1:8).

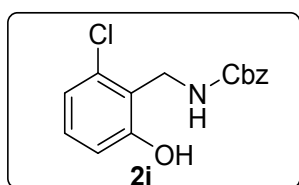

Pale yellow solid; Yield (51%, 29.7 mg); m. p. 62-63 °C; IR (neat,  $\text{cm}^{-1}$ ) 3337, 2921, 1646, 1525, 1453, 1251, 1123, 775, 738, 689;  $^1\text{H}$  NMR (400 MHz,  $\text{CDCl}_3$ )  $\delta$  9.15 (s, 1H), 7.38 – 7.32 (m, 5H), 7.16 – 7.11 (m, 1H), 6.95 – 6.89 (m, 2H), 5.63 (s, 1H), 5.12 (s, 2H), 4.45 (d,  $J = 6.8$  Hz, 2H).  $^{13}\text{C}$  NMR (101 MHz,  $\text{CDCl}_3$ )  $\delta$  159.3, 157.1, 135.6, 135.0, 130.1, 128.7, 128.6, 128.4, 123.6, 121.2, 117.4, 68.1, 37.9. HRMS Calcd for  $\text{C}_{15}\text{H}_{14}\text{ClNO}_3$  [ $\text{M}+\text{Na}^+$ ]: 314.0560; Found: 314.0568. Purified by column chromatography on silica gel (Ethyl acetate/Petroleum ether = 1:10 to 1:8).

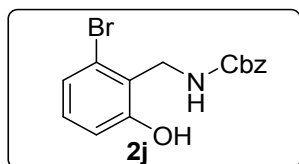

Yellow solid; Yield (41%, 27.5 mg); m. p. 60-61 °C; IR (neat,  $\text{cm}^{-1}$ ) 3337, 2919, 2948, 1677, 1535, 1444, 1269, 1120, 966, 775, 749, 695;  $^1\text{H}$  NMR (400 MHz,  $\text{CDCl}_3$ )  $\delta$  9.21 (s, 1H), 7.38 – 7.32 (m, 5H), 7.13 – 7.04 (m, 2H), 6.97 – 6.93 (m, 1H), 5.69 (s, 1H), 5.12 (s, 2H), 4.47 (d,  $J = 6.8$  Hz, 2H).  $^{13}\text{C}$  NMR (101 MHz,  $\text{CDCl}_3$ )  $\delta$  159.3, 157.1,

135.6, 130.6, 128.7, 128.6, 128.5, 125.5, 125.2, 124.5, 118.1, 68.1, 40.6. HRMS Calcd for  $C_{15}H_{14}BrNO_3$   $[M+H^+]$ : 336.0235; Found: 336.0243. Purified by column chromatography on silica gel (Ethyl acetate/Petroleum ether = 1:10 to 1:8).

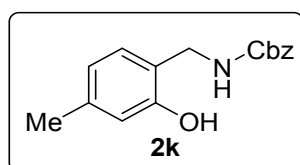

Pale yellow solid; Yield (58%, 31.4 mg); m. p. 93-95 °C; IR (neat,  $cm^{-1}$ ) 3346, 2919, 1646, 1525, 1466, 1248, 1040, 776, 747, 691;  $^1H$  NMR (400 MHz,  $CDCl_3$ )  $\delta$  8.40 (s, 1H), 7.37 – 7.31 (m, 5H), 6.96 (d,  $J = 7.6$  Hz, 1H), 6.78 (s, 1H), 6.66 (d,  $J = 7.6$  Hz, 1H), 5.43 (s, 1H), 5.12 (s, 2H), 4.26 (d,  $J = 6.7$  Hz, 2H), 2.29 (s, 3H).  $^{13}C$  NMR (101 MHz,  $CDCl_3$ )  $\delta$  158.8, 155.3, 140.3, 135.8, 130.5, 128.7, 128.5, 128.4, 121.7, 121.1, 118.4, 67.8, 41.3, 21.2. HRMS Calcd for  $C_{16}H_{17}NO_3$   $[M+Na^+]$ : 294.1106; Found: 294.1119. Purified by column chromatography on silica gel (Ethyl acetate/Petroleum ether = 1:10 to 1:8).

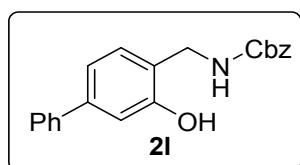

Pale yellow solid; Yield (49%, 32.6 mg); m. p. 81-83 °C; IR (neat,  $cm^{-1}$ ) 3393, 3290, 2919, 2848, 1683, 1508, 1410, 1260, 1227, 1114, 960, 907, 762, 693;  $^1H$  NMR (400 MHz,  $CDCl_3$ )  $\delta$  8.63 (s, 1H), 7.57 (d,  $J = 7.3$  Hz, 2H), 7.45 – 7.40 (m, 2H), 7.39 – 7.32 (m, 6H), 7.21 (s, 1H), 7.15 (d,  $J = 7.8$  Hz, 1H), 7.09 (d,  $J = 7.8$  Hz, 1H), 5.51 (s, 1H), 5.15 (s, 2H), 4.34 (d,  $J = 6.6$  Hz, 2H).  $^{13}C$  NMR (101 MHz,  $CDCl_3$ )  $\delta$  158.8, 155.8, 143.2, 140.6, 135.8, 131.1, 128.8, 128.7, 128.5, 128.4, 127.5, 127.1, 123.6, 119.1, 116.5, 67.9, 41.3. HRMS Calcd for  $C_{21}H_{19}NO_3$   $[M+Na^+]$ : 356.1263; Found: 356.1248. Purified by column chromatography on silica gel (Ethyl acetate/Petroleum ether = 1:10 to 1:8).

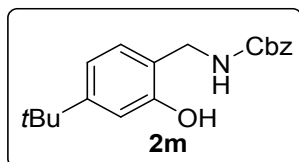

Pale yellow solid; Yield (51%, 31.9 mg); m. p. 61-63 °C; IR (neat,  $\text{cm}^{-1}$ ) 3317, 2945, 1664, 1560, 1395, 1375, 1240, 1115, 751, 690;  $^1\text{H}$  NMR (400 MHz,  $\text{CDCl}_3$ )  $\delta$  8.47 (s, 1H), 7.36 – 7.31 (m, 5H), 7.04 – 6.99 (m, 2H), 6.89 – 6.86 (m, 1H), 5.49 (s, 1H), 5.12 (s, 2H), 4.27 (d,  $J = 6.6$  Hz, 2H), 1.29 (s, 9H).  $^{13}\text{C}$  NMR (101 MHz,  $\text{CDCl}_3$ )  $\delta$  158.8, 155.1, 153.8, 135.8, 130.3, 128.7, 128.5, 128.4, 121.6, 117.3, 115.0, 67.8, 41.2, 34.7, 31.3. HRMS Calcd for  $\text{C}_{19}\text{H}_{23}\text{NO}_3$  [ $\text{M}+\text{Na}^+$ ]: 336.1576; Found: 336.1582. Purified by column chromatography on silica gel (Ethyl acetate/Petroleum ether = 1:10 to 1:8).

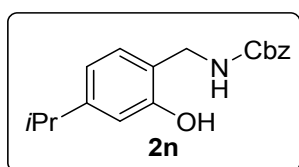

White solid; Yield (55%, 32.9 mg); m. p. 56-58 °C; IR (neat,  $\text{cm}^{-1}$ ) 3310, 2959, 1662, 1551, 1275, 1109, 952, 753, 695, 651;  $^1\text{H}$  NMR (400 MHz,  $\text{CDCl}_3$ )  $\delta$  7.36 – 7.31 (m, 5H), 7.02 (d,  $J = 7.7$  Hz, 1H), 6.84 (s, 1H), 6.73 (dd,  $J = 7.7, 1.7$  Hz, 1H), 5.51 (s, 1H), 5.12 (s, 2H), 4.27 (d,  $J = 6.6$  Hz, 2H), 2.90 – 2.77 (m, 1H), 1.23 (d,  $J = 6.9$  Hz, 6H).  $^{13}\text{C}$  NMR (101 MHz,  $\text{CDCl}_3$ )  $\delta$  158.8, 155.4, 151.4, 135.8, 130.6, 128.7, 128.5, 128.4, 122.0, 118.5, 115.7, 67.8, 41.3, 33.9, 23.9. HRMS Calcd for  $\text{C}_{18}\text{H}_{21}\text{NO}_3$  [ $\text{M}+\text{H}^+$ ]: 300.1600; Found: 300.1611. Purified by column chromatography on silica gel (Ethyl acetate/Petroleum ether = 1:10 to 1:8).

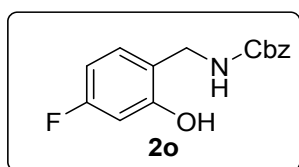

Pale yellow solid; Yield (36%, 19.8 mg); m. p. 57-59 °C; IR (neat,  $\text{cm}^{-1}$ ) 3317, 2920, 1658, 1503, 1282, 1241, 1144, 917, 751, 695;  $^1\text{H}$  NMR (400 MHz,  $\text{CDCl}_3$ )  $\delta$  8.97 (s, 1H), 7.40 – 7.30 (m, 5H), 7.03 – 6.99 (m, 1H), 6.66 (dd,  $J = 10.4, 2.5$  Hz, 1H), 6.57 –

6.51 (m, 1H), 5.47 (s, 1H), 5.14 (s, 2H), 4.25 (d,  $J = 6.7$  Hz, 2H).  $^{13}\text{C}$  NMR (101 MHz,  $\text{CDCl}_3$ )  $\delta$  163.8 (d,  $J = 245.7$  Hz), 159.0, 157.2 (d,  $J = 12.5$  Hz), 135.6, 131.6 (d,  $J = 10.2$  Hz), 128.7, 128.6, 128.4, 120.7 (d,  $J = 3.0$  Hz), 107.0 (d,  $J = 21.6$  Hz), 105.2 (d,  $J = 24.6$  Hz), 68.0, 41.1.  $^{19}\text{F}$  NMR (376 MHz,  $\text{CDCl}_3$ )  $\delta$  -112.0. HRMS Calcd for  $\text{C}_{15}\text{H}_{14}\text{FNO}_3$  [ $\text{M}+\text{Na}^+$ ]: 298.0855; Found: 298.0856. Purified by column chromatography on silica gel (Ethyl acetate/Petroleum ether = 1:10 to 1:8).

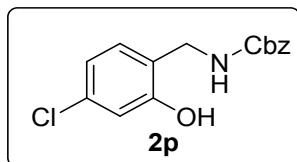

Pale yellow solid; Yield (45%, 26.2 mg); m. p. 96-98 °C; IR (neat,  $\text{cm}^{-1}$ ) 3463, 3313, 2923, 1688, 1518, 1249, 967, 909, 858, 743, 696;  $^1\text{H}$  NMR (400 MHz,  $\text{CDCl}_3$ )  $\delta$  8.88 (s, 1H), 7.36 – 7.32 (m, 5H), 6.99 (d,  $J = 8.1$  Hz, 1H), 6.96 (d,  $J = 1.8$  Hz, 1H), 6.83 – 6.80 (m, 1H), 5.46 (s, 1H), 5.13 (s, 2H), 4.25 (d,  $J = 6.7$  Hz, 2H).  $^{13}\text{C}$  NMR (101 MHz,  $\text{CDCl}_3$ )  $\delta$  158.9, 156.5, 135.6, 135.1, 131.5, 128.7, 128.6, 128.4, 123.3, 120.3, 118.2, 68.1, 41.1. HRMS Calcd for  $\text{C}_{15}\text{H}_{14}\text{ClNO}_3$  [ $\text{M}+\text{Na}^+$ ]: 314.0560; Found: 314.0560. Purified by column chromatography on silica gel (Ethyl acetate/Petroleum ether = 1:10 to 1:8).

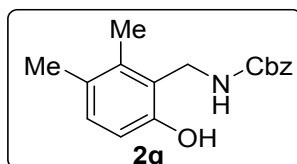

White solid; Yield (60%, 34.2 mg); m. p. 93-95 °C; IR (neat,  $\text{cm}^{-1}$ ) 3320, 2963, 1649, 1529, 1282, 1251, 1040, 810, 751, 693;  $^1\text{H}$  NMR (400 MHz,  $\text{CDCl}_3$ )  $\delta$  8.28 (s, 1H), 7.38 – 7.31 (m, 5H), 7.00 (d,  $J = 8.2$  Hz, 1H), 6.76 (d,  $J = 8.2$  Hz, 1H), 5.47 (s, 1H), 5.10 (s, 2H), 4.39 (d,  $J = 6.5$  Hz, 2H), 2.22 (s, 3H), 2.21 (s, 3H).  $^{13}\text{C}$  NMR (101 MHz,  $\text{CDCl}_3$ )  $\delta$  158.7, 153.8, 135.8, 135.7, 130.7, 128.7, 128.5, 128.4, 124.1, 123.9, 115.3, 67.8, 37.4, 20.1, 15.8. HRMS Calcd for  $\text{C}_{17}\text{H}_{19}\text{NO}_3$  [ $\text{M}+\text{H}^+$ ]: 286.1443; Found: 286.1437. Purified by column chromatography on silica gel (Ethyl acetate/Petroleum ether = 1:10 to 1:8).



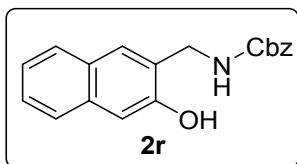

Yellow solid; Yield (52%, 31.9 mg); m. p. 52-53 °C; IR (neat,  $\text{cm}^{-1}$ ) 3312, 2921, 1689, 1517, 1453, 1239, 1157, 1098, 867, 744, 695;  $^1\text{H}$  NMR (400 MHz,  $\text{CDCl}_3$ )  $\delta$  8.24 (s, 1H), 7.69 (d,  $J = 8.2$  Hz, 1H), 7.65 (d,  $J = 8.2$  Hz, 1H), 7.61 (s, 1H), 7.40 – 7.37 (m, 1H), 7.36 – 7.32 (m, 5H), 7.32 – 7.27 (m, 2H), 5.55 (s, 1H), 5.14 (s, 2H), 4.49 (d,  $J = 6.6$  Hz, 2H).  $^{13}\text{C}$  NMR (101 MHz,  $\text{CDCl}_3$ )  $\delta$  158.4, 153.1, 135.9, 134.9, 129.8, 128.7, 128.5, 128.5, 128.3, 127.5, 127.0, 126.6, 126.3, 123.7, 111.8, 67.8, 41.94. HRMS Calcd for  $\text{C}_{19}\text{H}_{17}\text{NO}_3$  [ $\text{M}+\text{Na}^+$ ]: 330.1106; Found: 330.1109. Purified by column chromatography on silica gel (Ethyl acetate/Petroleum ether = 1:10 to 1:8).

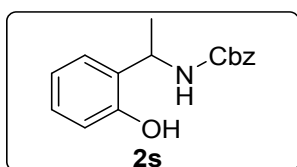

Yellow solid; Yield (62%, 33.6 mg); m. p. 55-57 °C; IR (neat,  $\text{cm}^{-1}$ ) 3311, 2924, 1680, 1517, 1453, 1232, 1060, 749, 694;  $^1\text{H}$  NMR (400 MHz,  $\text{CDCl}_3$ )  $\delta$  8.08 (s, 1H), 7.38 – 7.31 (m, 5H), 7.20 – 7.16 (m, 1H), 7.16 – 7.12 (m, 1H), 6.91 – 6.86 (m, 2H), 5.38 (s, 1H), 5.16 (d,  $J = 12.1$  Hz, 1H), 5.06 (d,  $J = 12.0$  Hz, 2H), 1.55 (d,  $J = 7.0$  Hz, 3H).  $^{13}\text{C}$  NMR (101 MHz,  $\text{CDCl}_3$ )  $\delta$  157.2, 154.3, 136.0, 129.1, 128.8, 128.6, 128.3, 128.2, 126.5, 120.4, 117.3, 67.4, 46.2, 20.6. HRMS Calcd for  $\text{C}_{16}\text{H}_{17}\text{NO}_3$  [ $\text{M}+\text{Na}^+$ ]: 294.1106; Found: 294.1111. Purified by column chromatography on silica gel (Ethyl acetate/Petroleum ether = 1:8 to 1:5).

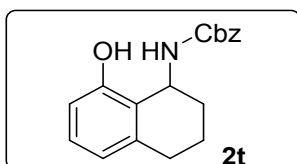

White solid; Yield (56%, 33.3 mg); m. p. 75-77 °C; IR (neat,  $\text{cm}^{-1}$ ) 3311, 2921, 1650, 1536, 1464, 1322, 1244, 1071, 952, 774, 749, 694;  $^1\text{H}$  NMR (400 MHz,  $\text{CDCl}_3$ )  $\delta$  8.22

(s, 1H), 7.39 – 7.31 (m, 5H), 7.10 (t,  $J = 7.8$  Hz, 1H), 6.77 (d,  $J = 8.0$  Hz, 1H), 6.65 (d,  $J = 7.6$  Hz, 1H), 5.31 (d,  $J = 7.0$  Hz, 1H), 5.20 – 5.08 (m, 2H), 5.04 – 4.99 (m, 1H), 2.90 – 2.70 (m, 2H), 2.10 – 2.03 (m, 1H), 1.98 – 1.86 (m, 2H), 1.70 – 1.59 (m, 1H).  $^{13}\text{C}$  NMR (101 MHz,  $\text{CDCl}_3$ )  $\delta$  157.9, 155.8, 137.6, 135.8, 128.9, 128.7, 128.5, 128.4, 122.8, 120.9, 114.6, 67.9, 43.5, 29.7, 28.8, 17.9. HRMS Calcd for  $\text{C}_{18}\text{H}_{19}\text{NO}_3$  [ $\text{M}+\text{Na}^+$ ]: 320.1263; Found: 320.1251. Purified by column chromatography on silica gel (Ethyl acetate/Petroleum ether = 1:10 to 1:8).

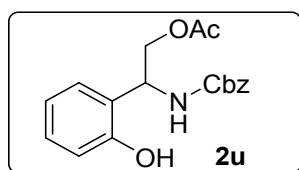

White solid; Yield (66%, 43.4 mg); m. p. 93-96° C; IR (neat,  $\text{cm}^{-1}$ ) 3459, 3324, 2918, 1726, 1684, 1541, 1291, 1254, 1230, 1213, 1051, 1026, 749, 695;  $^1\text{H}$  NMR (400 MHz,  $\text{CDCl}_3$ )  $\delta$  7.73 (s, 1H), 7.39 – 7.30 (m, 5H), 7.15 – 7.11 (m, 1H), 7.10 – 7.07 (m, 1H), 6.83 (t,  $J = 7.4$  Hz, 1H), 6.75 (d,  $J = 8.0$  Hz, 1H), 5.97 (s, 1H), 5.22 – 5.04 (m, 3H), 4.49 (s, 1H), 4.27 (dd,  $J = 11.2, 4.8$  Hz, 1H), 2.00 (s, 3H).  $^{13}\text{C}$  NMR (101 MHz,  $\text{CDCl}_3$ )  $\delta$  171.6, 156.9, 154.4, 136.2, 129.4, 128.6, 128.3, 128.2, 120.4, 116.4, 67.4, 65.4, 20.9. HRMS Calcd for  $\text{C}_{18}\text{H}_{19}\text{NO}_5$  [ $\text{M}+\text{Na}^+$ ]: 352.1161; Found: 352.1166. Purified by column chromatography on silica gel (Ethyl acetate/Petroleum ether = 1:10 to 1:8).

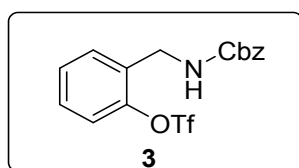

White solid; Yield (75%, 58.4 mg); m. p. 62-64 °C; IR (neat,  $\text{cm}^{-1}$ ) 3317, 2918, 1683, 1517, 1289, 1155, 1045, 760, 695;  $^1\text{H}$  NMR (400 MHz,  $\text{CDCl}_3$ )  $\delta$  7.52 – 7.48 (m, 1H), 7.36 – 7.28 (m, 6H), 7.26 – 7.23 (m, 2H), 5.30 (s, 1H), 5.10 (s, 2H), 4.46 (d,  $J = 6.3$  Hz, 2H).  $^{13}\text{C}$  NMR (101 MHz,  $\text{CDCl}_3$ )  $\delta$  156.56 (s), 147.3, 136.3, 131.7, 130.8, 129.5, 128.8, 128.6, 128.2, 121.5, 120.2, 117.0, 67.2, 39.7. HRMS Calcd for  $\text{C}_{16}\text{H}_{14}\text{F}_3\text{NO}_5\text{S}$  [ $\text{M}+\text{Na}^+$ ]: 412.0442; Found: 412.0452. Purified by column chromatography on silica gel (Ethyl acetate/Petroleum ether = 1:10).

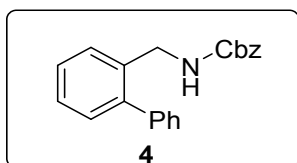

White solid; Yield (81%, 51.4 mg); m. p. 83-85 °C; IR (neat,  $\text{cm}^{-1}$ ) 3313, 2945, 1687, 1525, 1243, 1048, 743, 694;  $^1\text{H}$  NMR (400 MHz,  $\text{CDCl}_3$ )  $\delta$  7.48 – 7.43 (m, 1H), 7.42 – 7.37 (m, 3H), 7.37 – 7.32 (m, 6H), 7.31 – 7.24 (m, 4H), 5.08 (s, 2H), 4.84 (s, 1H), 4.35 (d,  $J = 5.9$  Hz, 2H).  $^{13}\text{C}$  NMR (101 MHz,  $\text{CDCl}_3$ )  $\delta$  156.3, 141.7, 140.7, 136.6, 135.7, 130.3, 129.1, 128.6, 128.5, 128.5, 128.2, 127.8, 127.5, 127.4, 66.9, 43.1. HRMS Calcd for  $\text{C}_{21}\text{H}_{19}\text{NO}_2$  [ $\text{M}+\text{Na}^+$ ]: 340.1313; Found: 340.1327. Purified by column chromatography on silica gel (Ethyl acetate/Petroleum ether = 1:15 to 1:10).

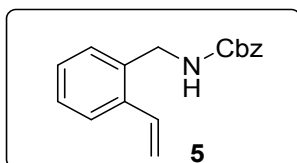

White solid; Yield (86%, 45.9 mg); m. p. 51-53 °C; IR (neat,  $\text{cm}^{-1}$ ) 3356, 2920, 2849, 1696, 1519, 1243, 1041, 751, 736, 695;  $^1\text{H}$  NMR (400 MHz,  $\text{CDCl}_3$ )  $\delta$  7.51 (d,  $J = 7.1$  Hz, 1H), 7.38 – 7.31 (m, 5H), 7.30 – 7.24 (m, 3H), 7.01 – 6.91 (m, 1H), 5.67 (d,  $J = 17.3$  Hz, 1H), 5.34 (d,  $J = 11.1$  Hz, 1H), 5.13 (s, 2H), 4.94 (s, 1H), 4.46 (d,  $J = 5.6$  Hz, 2H).  $^{13}\text{C}$  NMR (101 MHz,  $\text{CDCl}_3$ )  $\delta$  156.1, 136.9, 136.6, 135.0, 133.7, 129.0, 128.6, 128.2, 128.2, 128.1, 126.3, 117.0, 66.9, 43.2. HRMS Calcd for  $\text{C}_{17}\text{H}_{17}\text{NO}_2$  [ $\text{M}+\text{Na}^+$ ]: 290.1157; Found: 290.1165. Purified by column chromatography on silica gel (Ethyl acetate/Petroleum ether = 1:15 to 1:10).

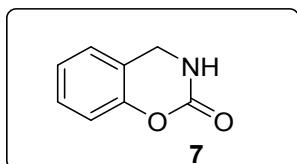

White solid; Yield (95%, 28.3 mg); m. p. 189-191 °C; IR (neat,  $\text{cm}^{-1}$ ) 3246, 3147, 1712, 1476, 1458, 1406, 1264, 1181, 1027, 933, 739, 620;  $^1\text{H}$  NMR (400 MHz, DMSO)  $\delta$



Yellow solid; Yield (55%, 78.9 mg); m. p. 182-184 °C; IR (neat, cm<sup>-1</sup>) 2919, 2850, 1621, 1595, 1451, 1271, 1147, 783, 736, 703; <sup>1</sup>H NMR (400 MHz, CDCl<sub>3</sub>) δ 11.78 (s, 1H), 8.82 – 8.77 (m, 1H), 8.66 – 8.62 (m, 1H), 8.55 (d, *J* = 7.3 Hz, 1H), 8.12 (d, *J* = 8.0 Hz, 1H), 7.81 – 7.77 (m, 1H), 7.77 – 7.71 (m, 1H), 7.37 – 7.31 (m, 1H), 7.21 – 7.18 (m, 1H), 7.15 – 7.11 (m, 1H), 7.05 – 6.97 (m, 2H), 6.80 – 6.75 (m, 1H). <sup>13</sup>C NMR (101 MHz, CDCl<sub>3</sub>) δ 160.6, 159.9, 154.4, 154.2, 141.7, 141.6, 136.8, 136.0, 134.3, 133.9, 129.3, 126.8, 125.6, 124.6, 124.1, 121.7, 121.3, 118.3. HRMS Calcd for C<sub>18</sub>H<sub>13</sub>N<sub>3</sub>O [M+Na<sup>+</sup>]: 310.0956; Found: 310.0960. Purified by column chromatography on silica gel (Ethyl acetate/Petroleum ether = 1:4).

## References

- 1 Y. Chen, C. A. Hone, B. Gutmann, C. O. Kappe, Continuous Flow Synthesis of Carbonylated Heterocycles via Pd Catalyzed Oxidative Carbonylation Using CO and O<sub>2</sub> at Elevated Temperatures and Pressures. *Org. Process Res. Dev.* 2017, **21**, 1080.
- 2 J. Zhang, D. Ren; Y. Ma, W. Wang, H. Wu, CuO Nanoparticles Catalyzed Simple and Efficient Synthesis of 2,3-Dihydroquinazolin-4(1H)-ones and Quinazolin-4(3H)-ones under Ultrasound Irradiation in Aqueous Ethanol under Ultrasound Irradiation in Aqueous Ethanol. *Tetrahedron*, 2014, **70**, 5274.
- 3 K. Kamei, N. Maeda, K. Nomura, M. Shibata, R. Katsuragi-Ogino, M. Koyama, M. Nakajima, T. Inoue, T. Ohno, T. Tatsuoka, Synthesis, SAR studies, and Evaluation of 1,4-benzoxazepine Derivatives as Selective 5-HT<sub>1A</sub> Receptor Agonists with Neuroprotective Effect: Discovery of Piclozotan. *Bioorg. Med. Chem.* 2006, **14**, 1978.
- 4 Z. Y. Hu, J. Hou, J. Liu, W.Q. Yu, J. B. Chang, Synthesis of Imidazo[1,5-*a*] pyridines via I<sub>2</sub>-mediated sp<sup>3</sup> C-H Amination. *Org. Biomol. Chem.* 2018, **16**, 5653.

# $^1\text{H}$ NMR and $^{13}\text{C}$ NMR spectra

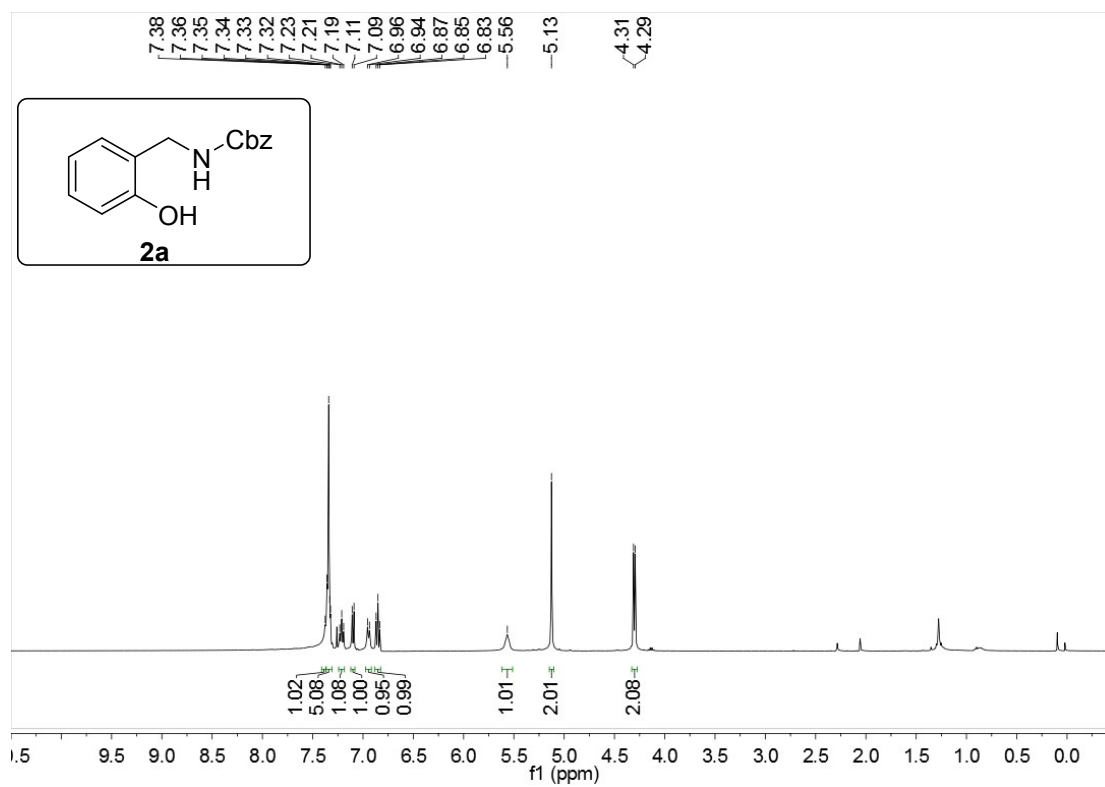

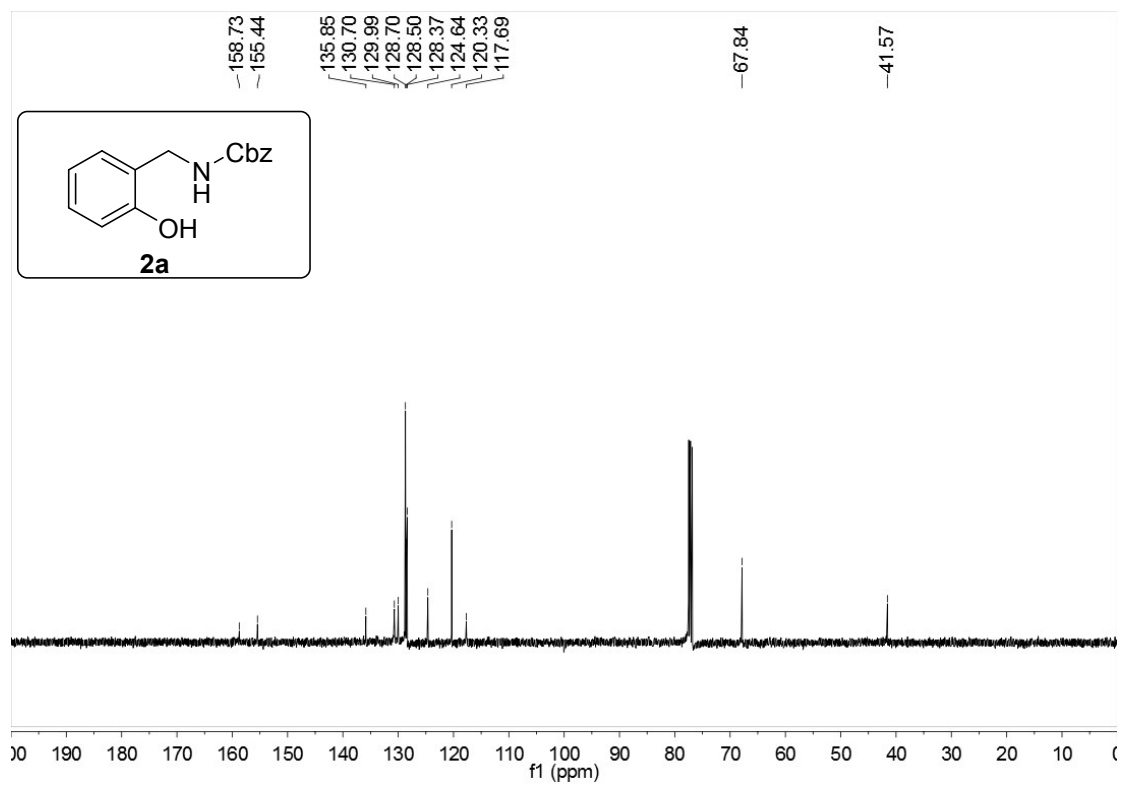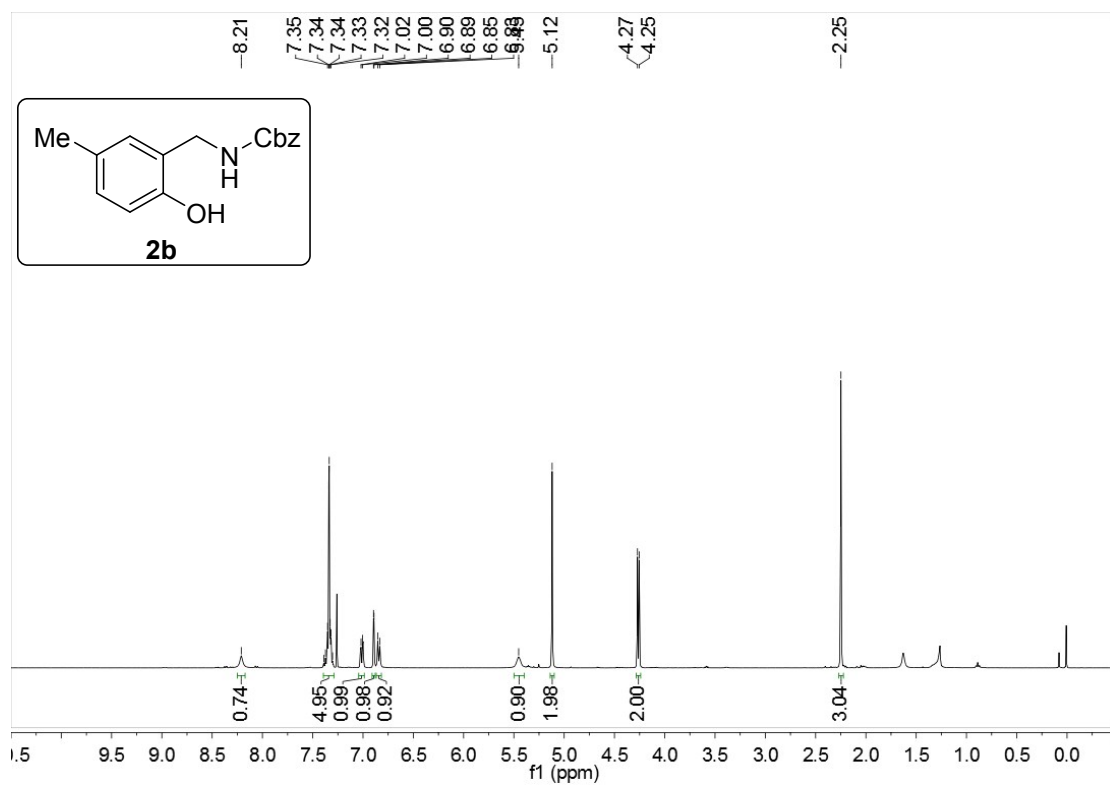

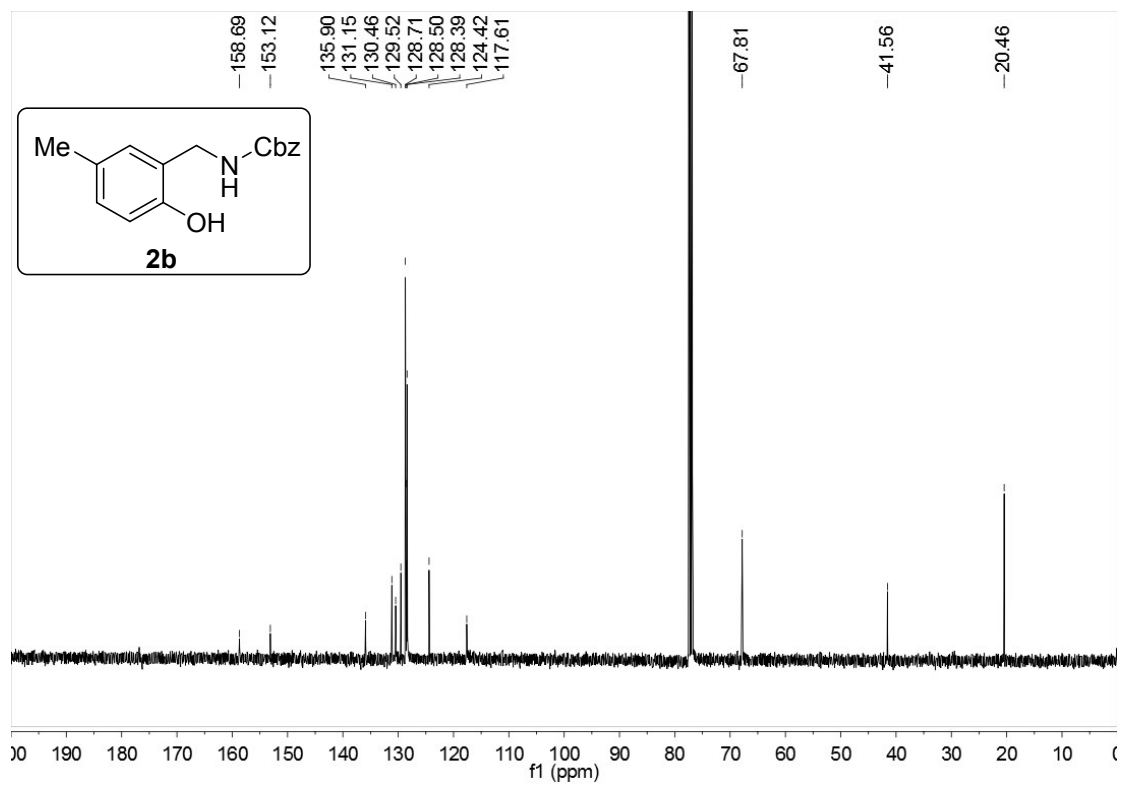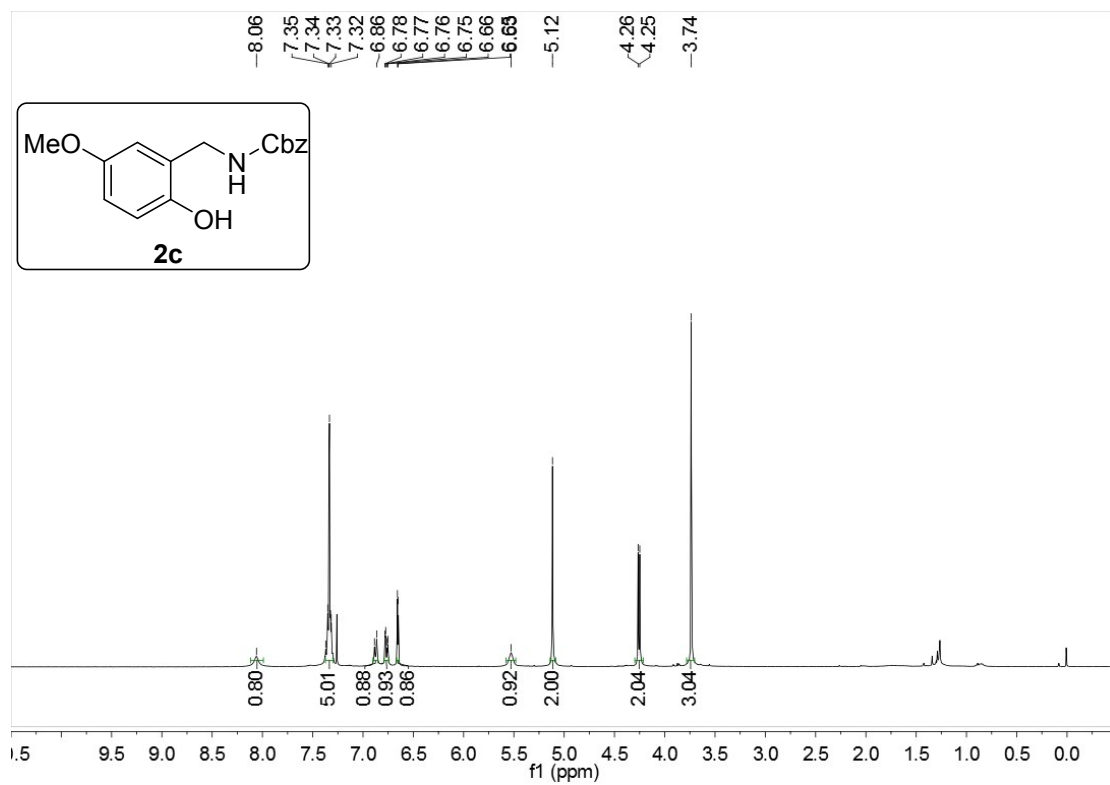



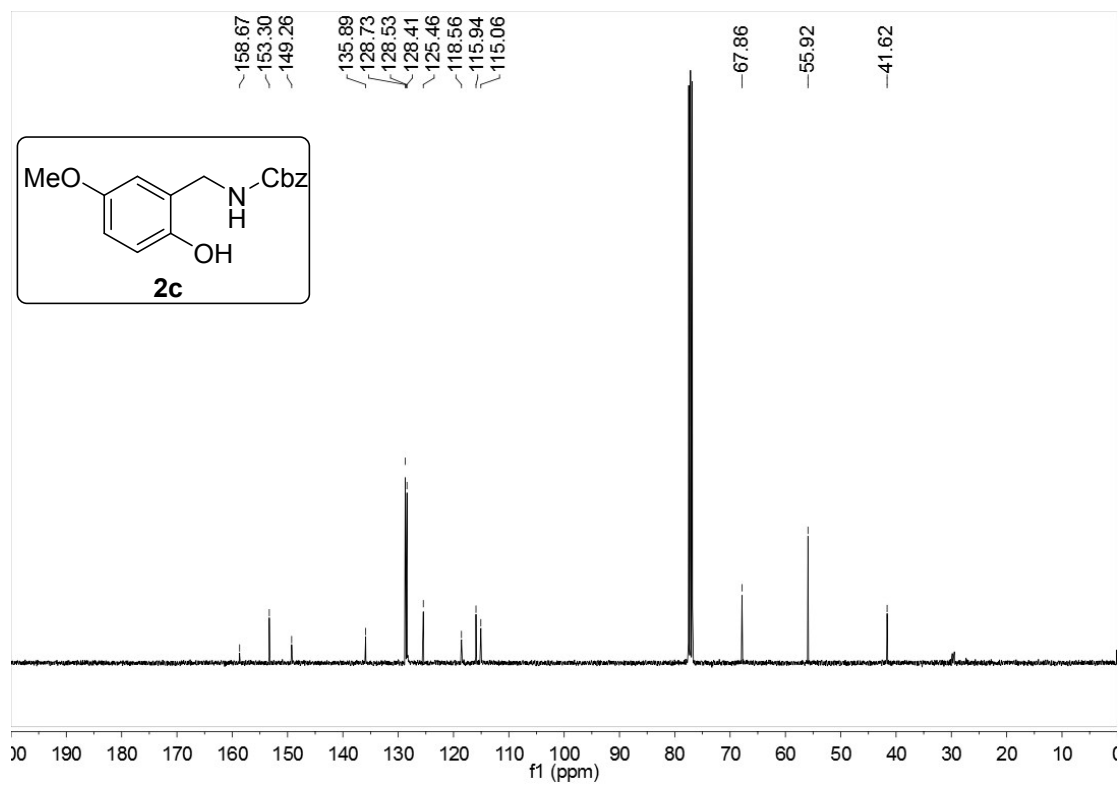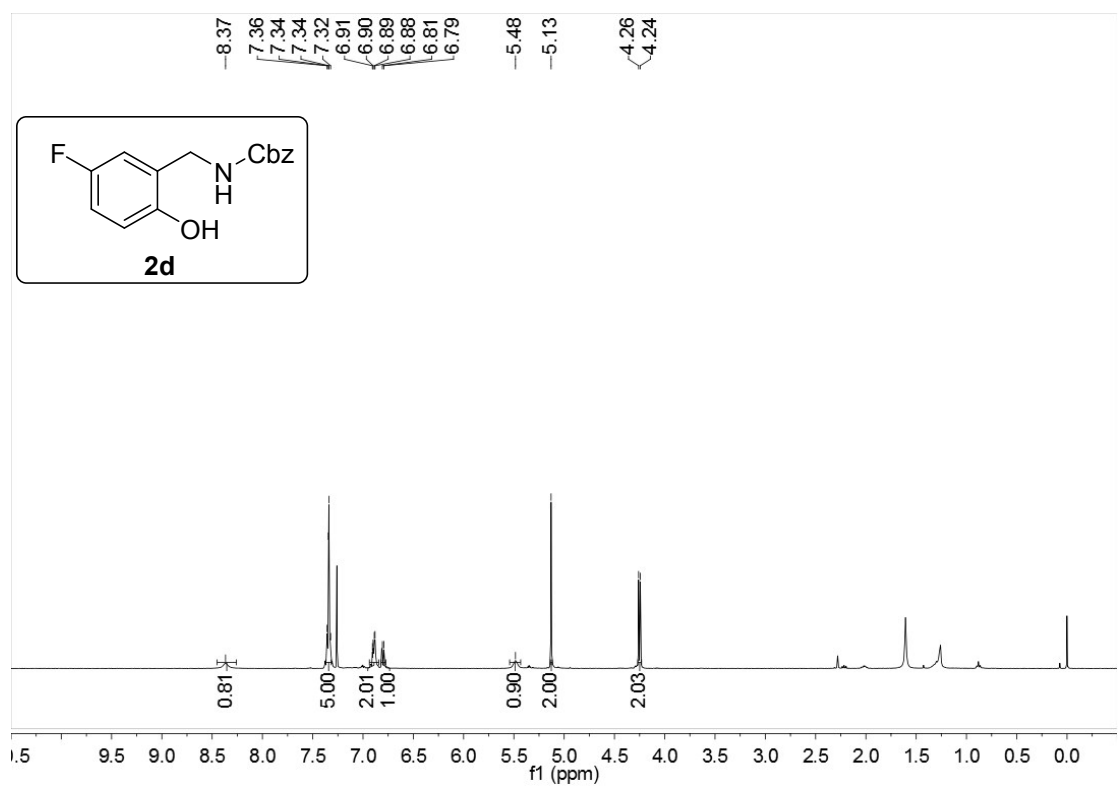

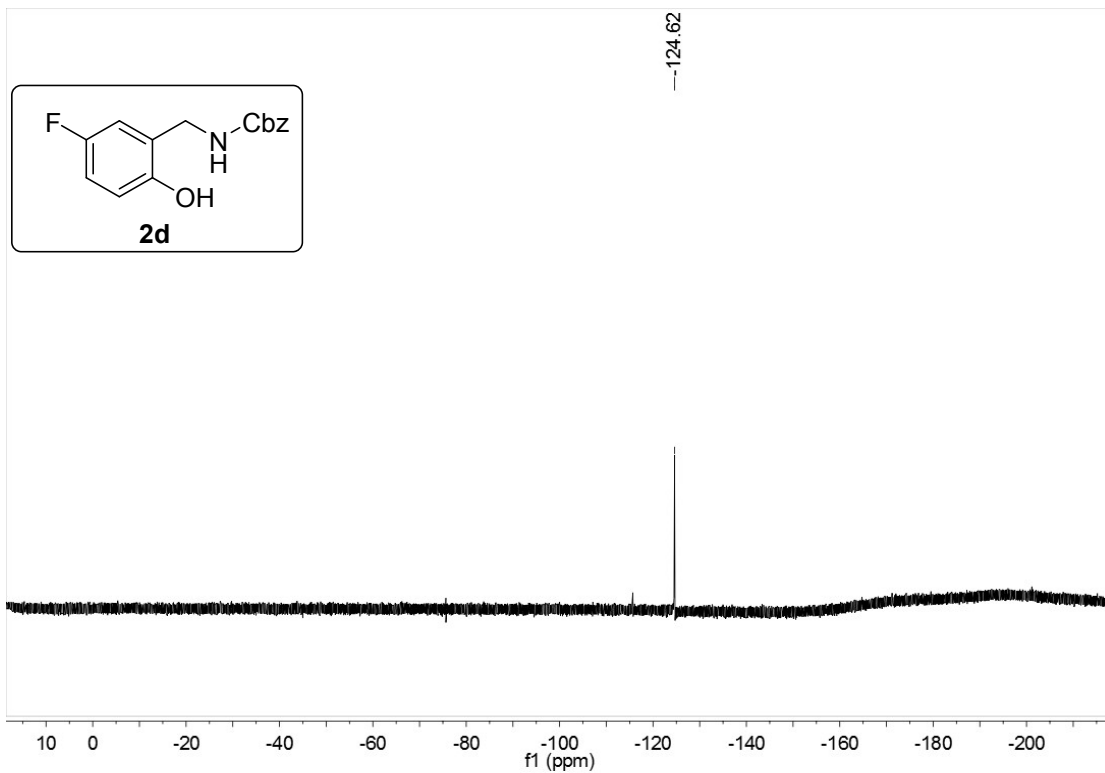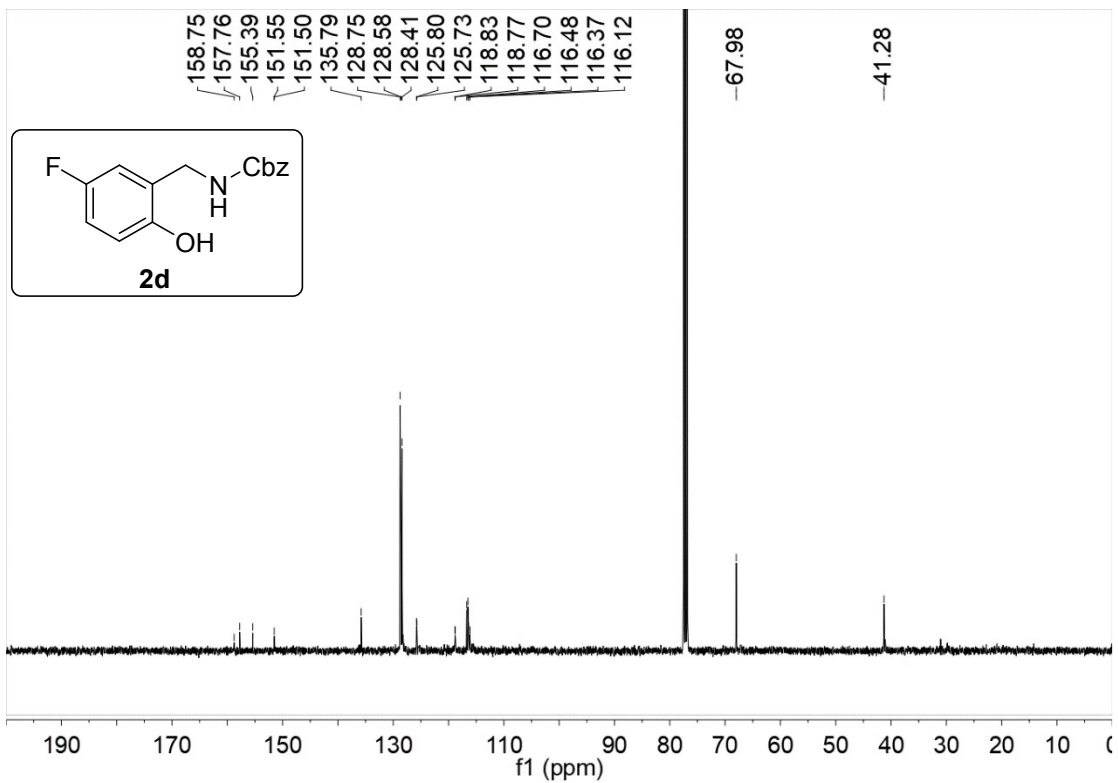

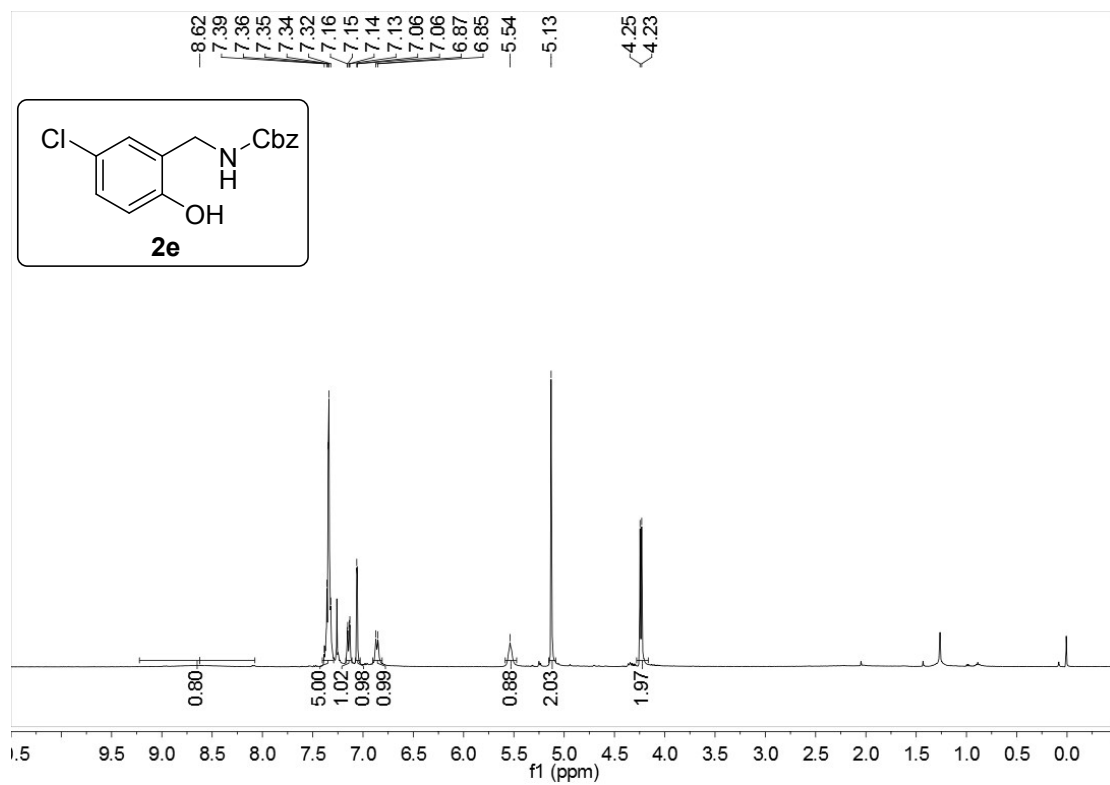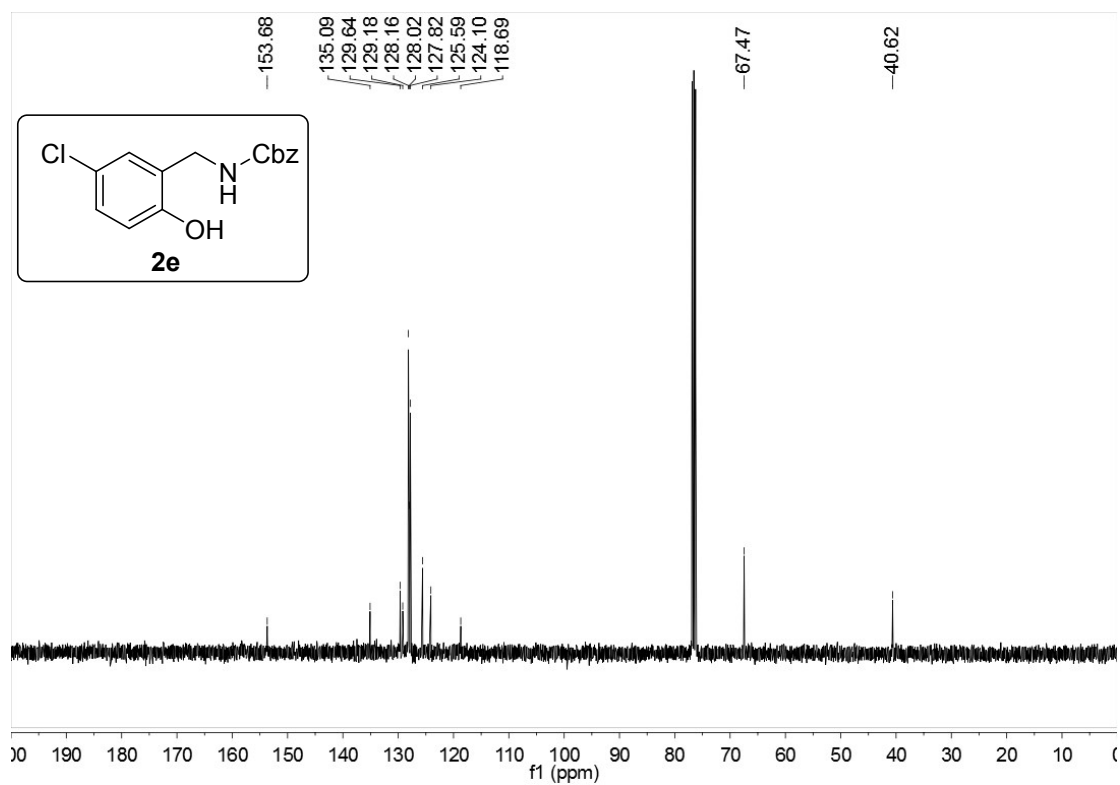

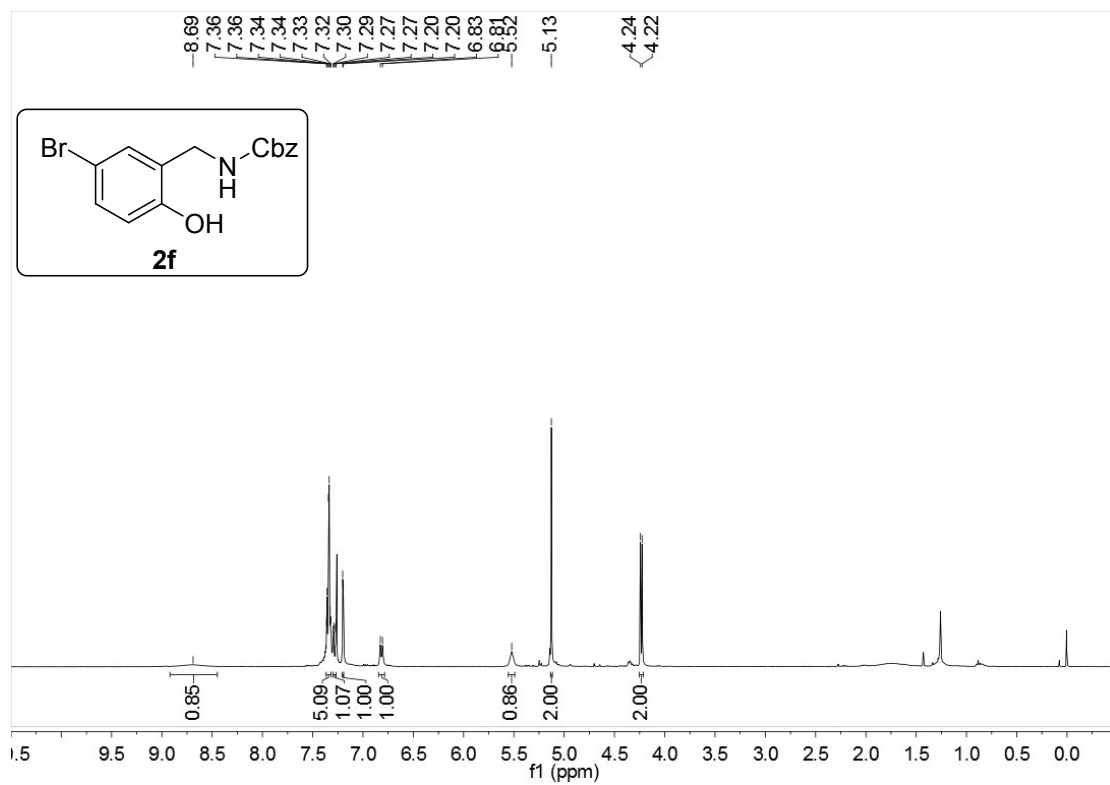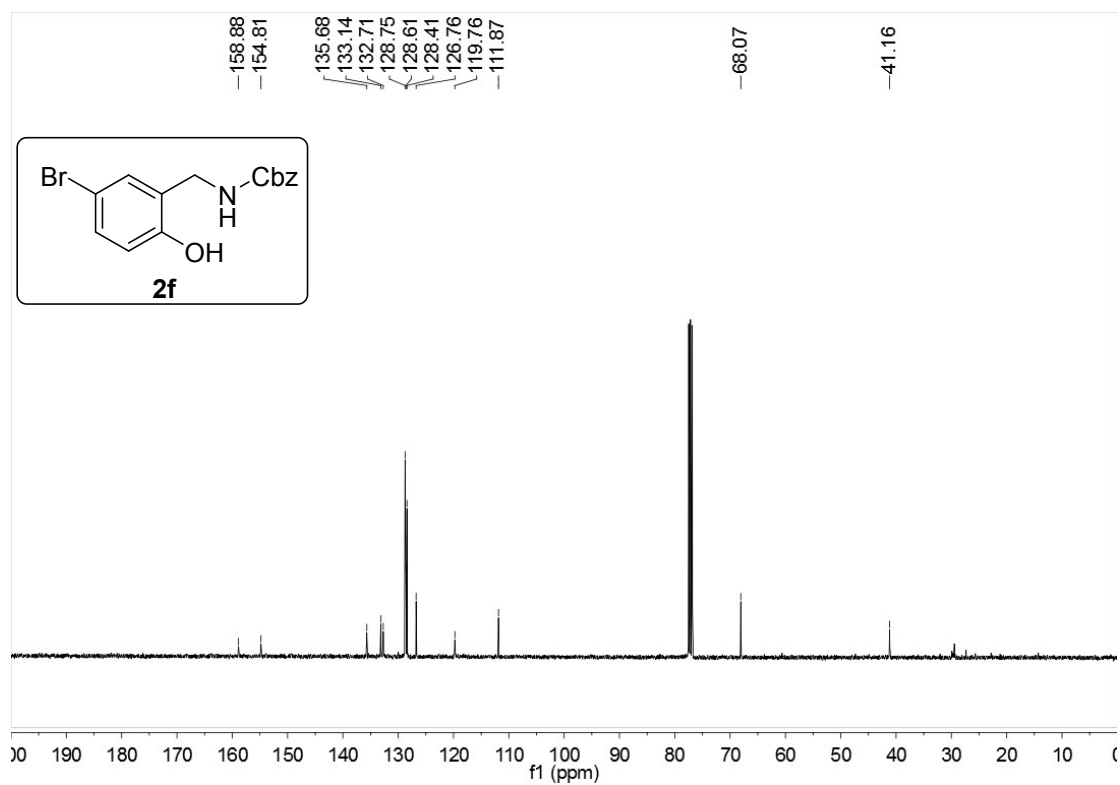

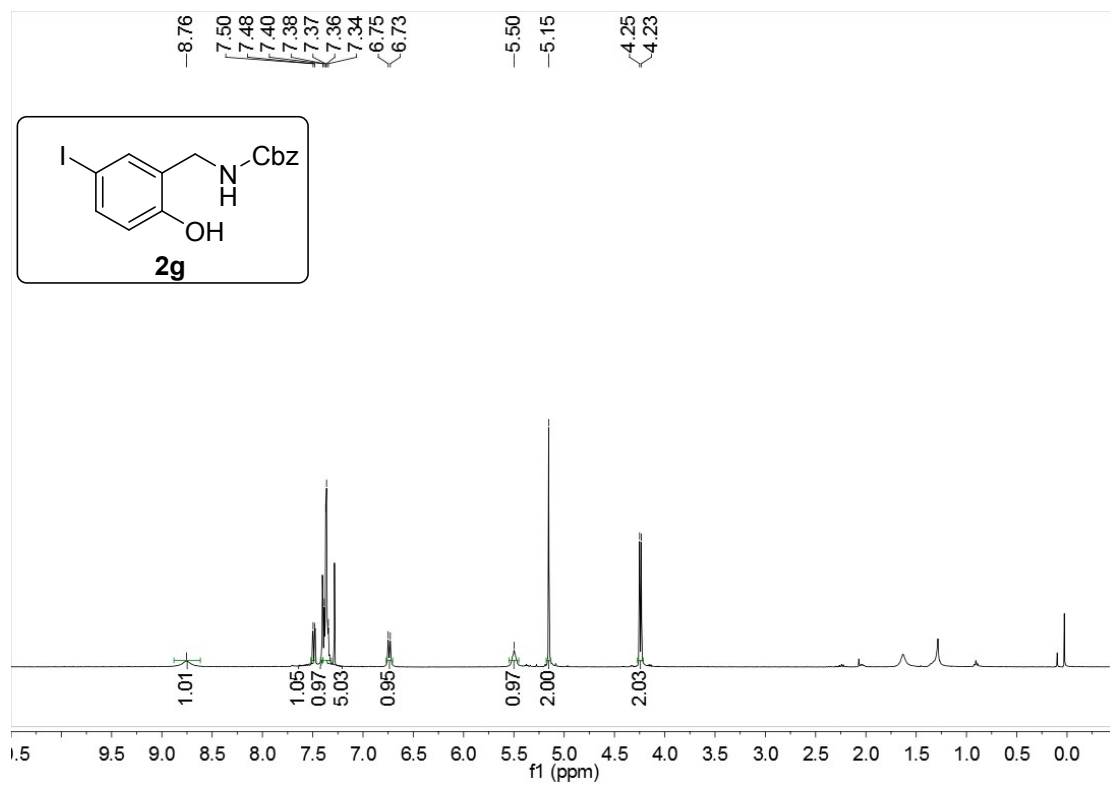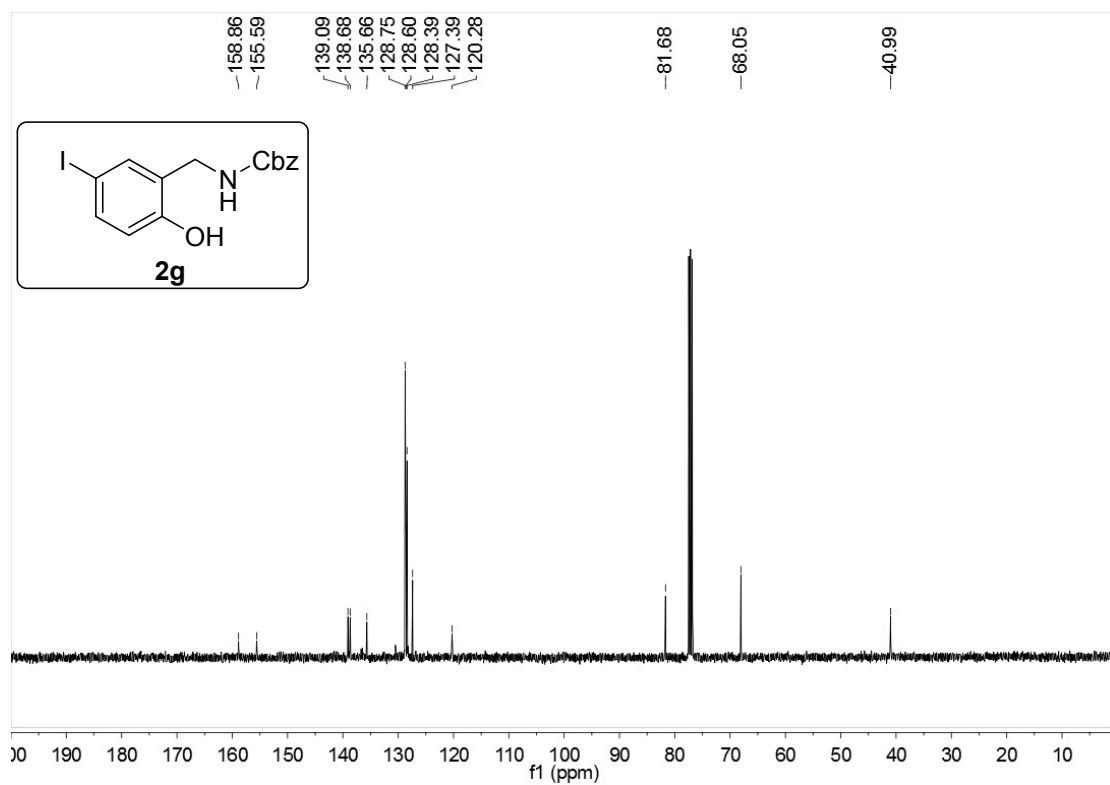

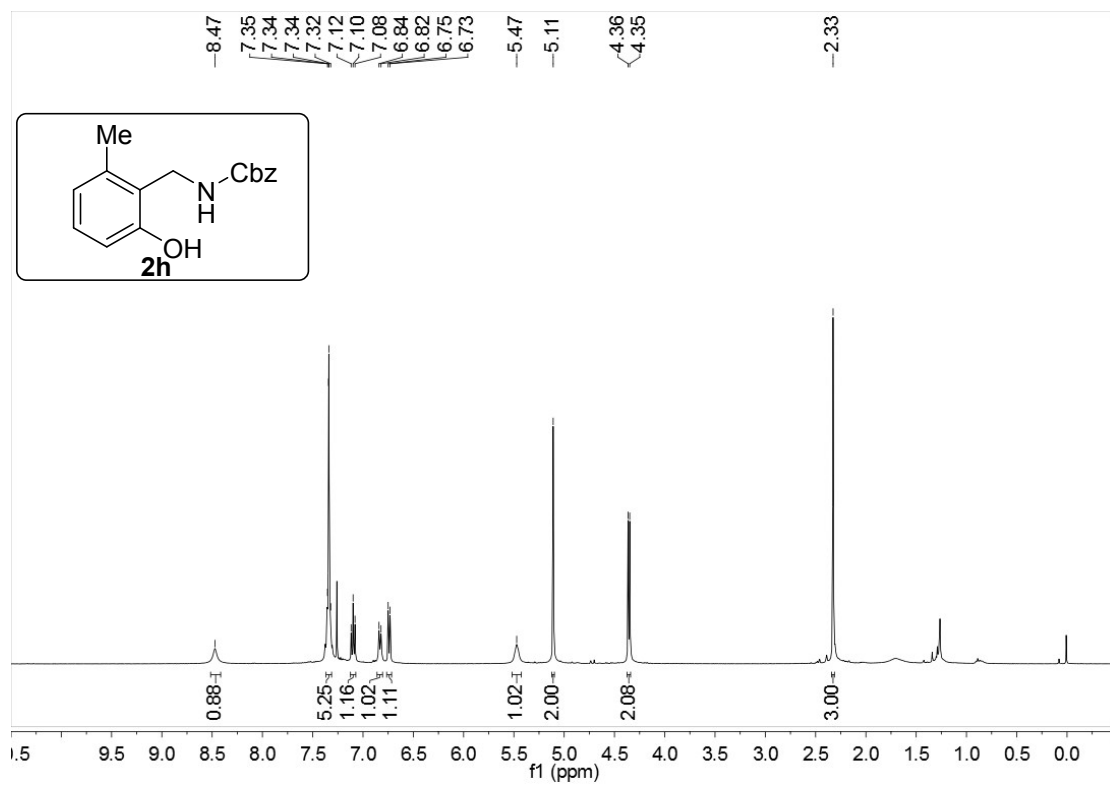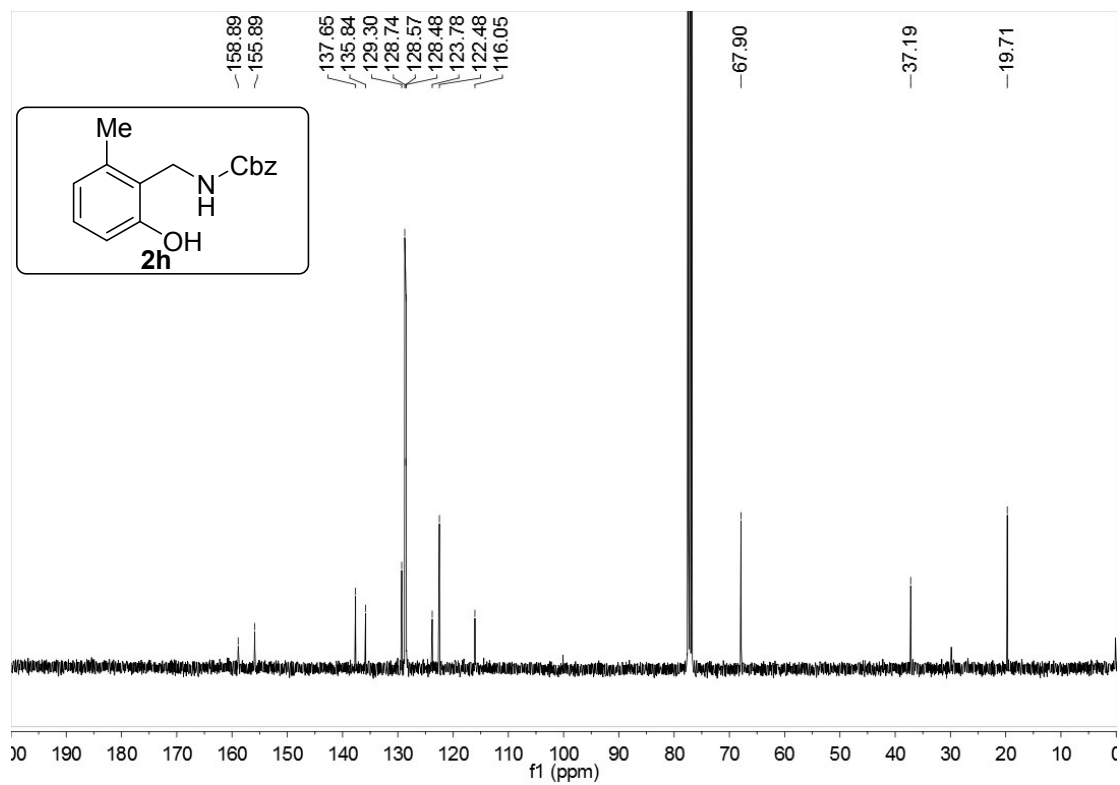

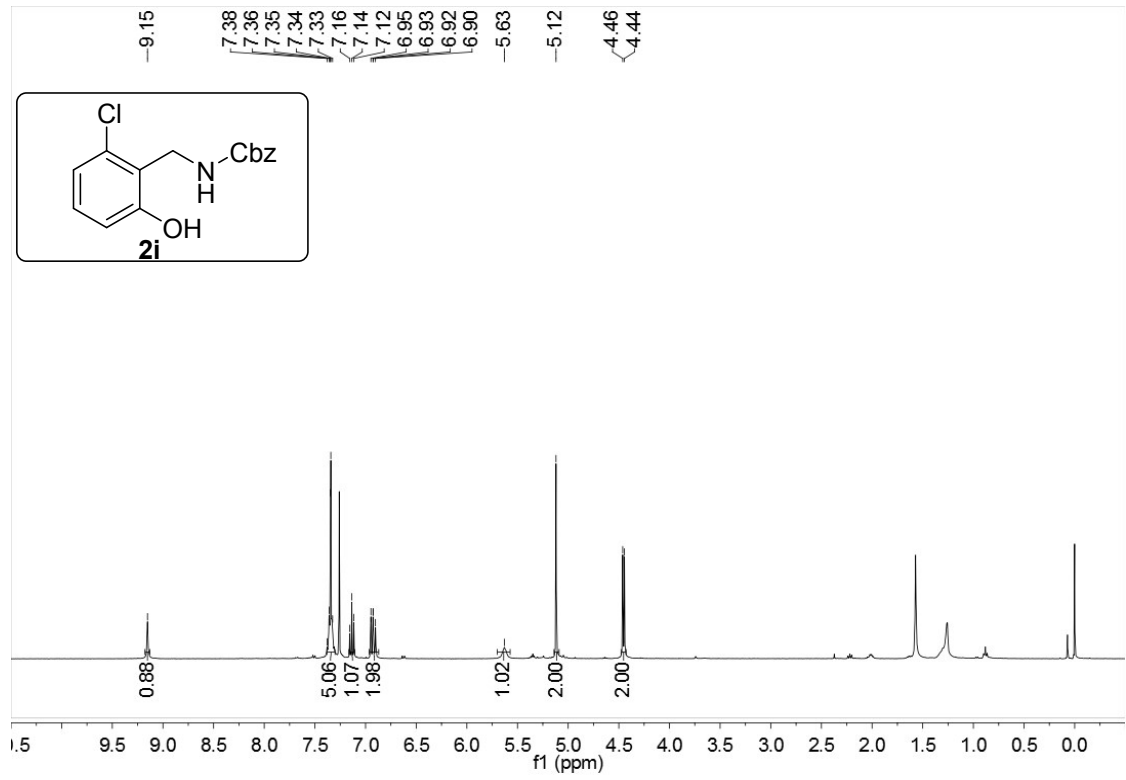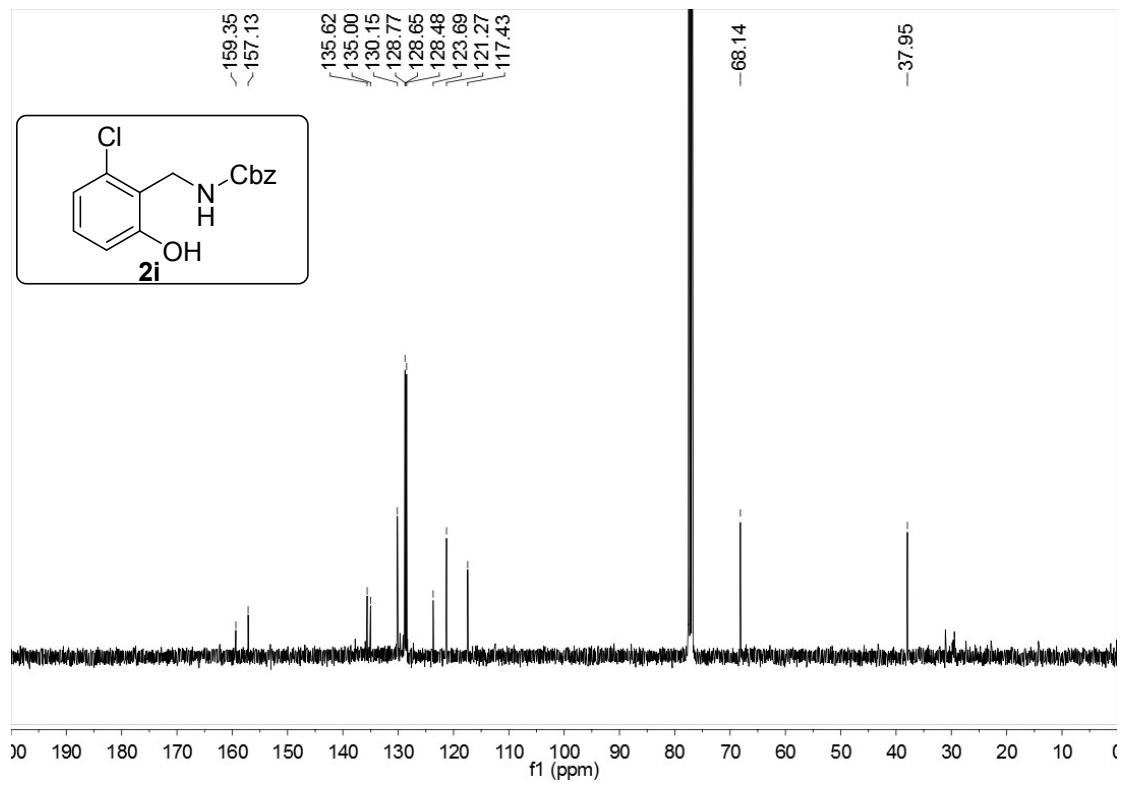

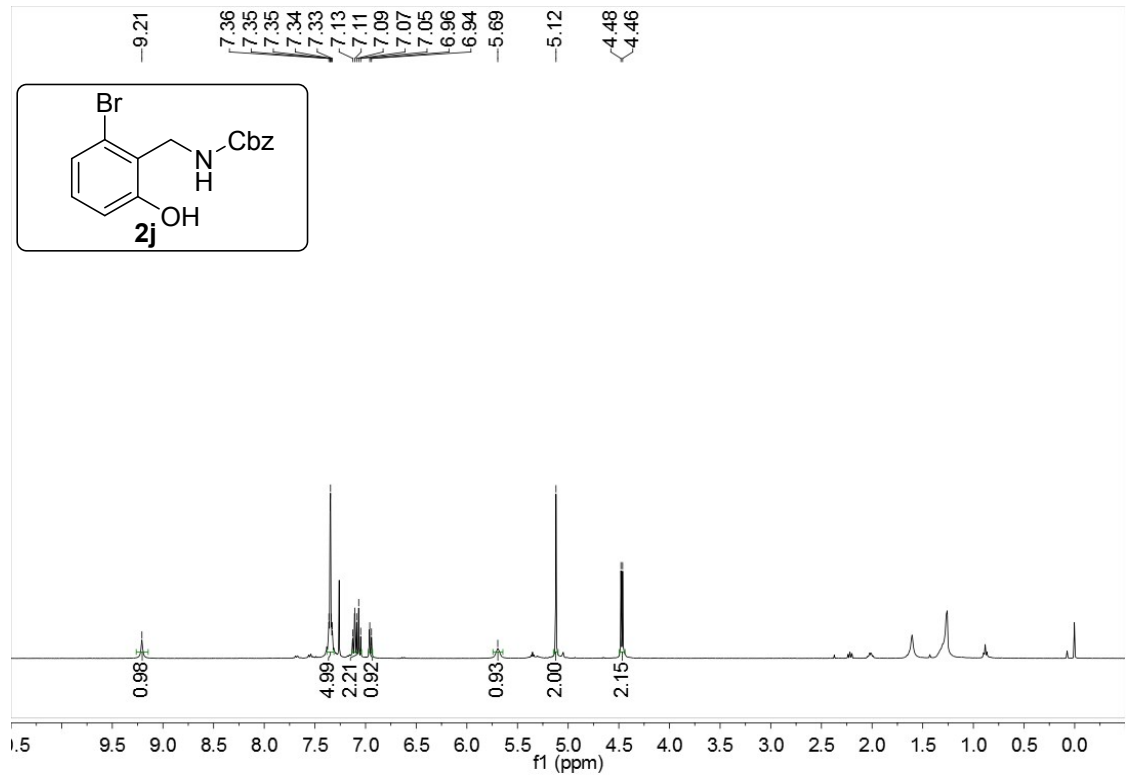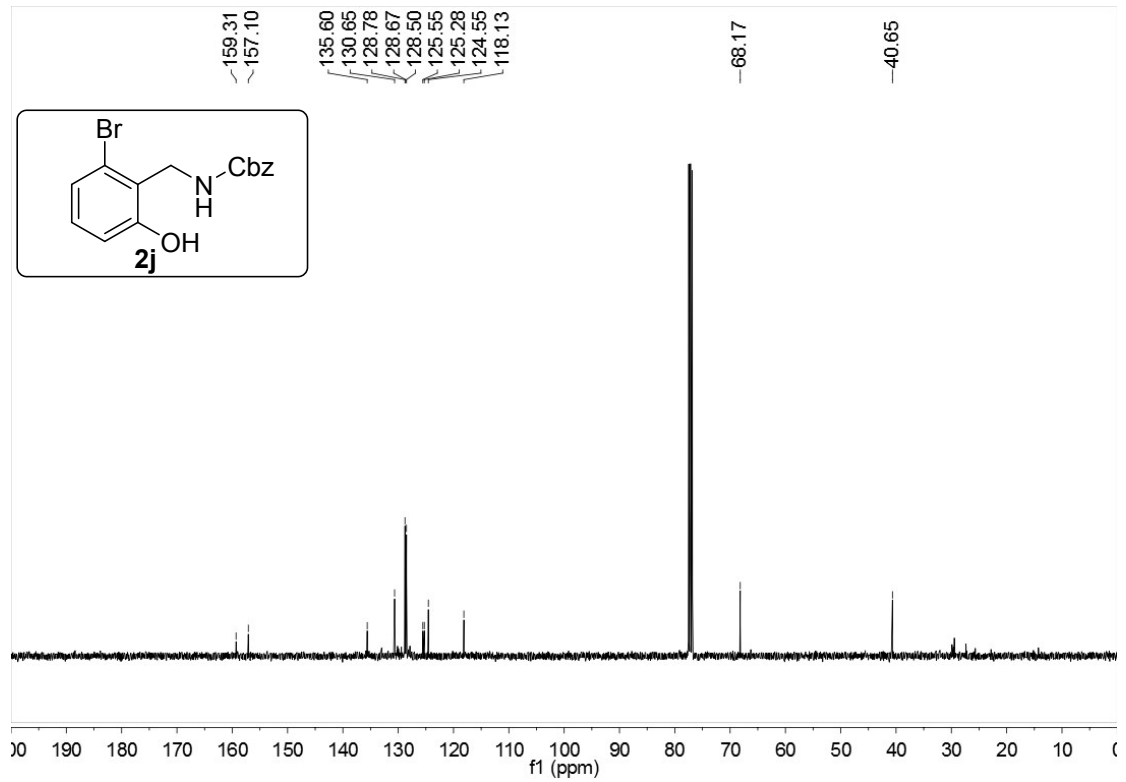



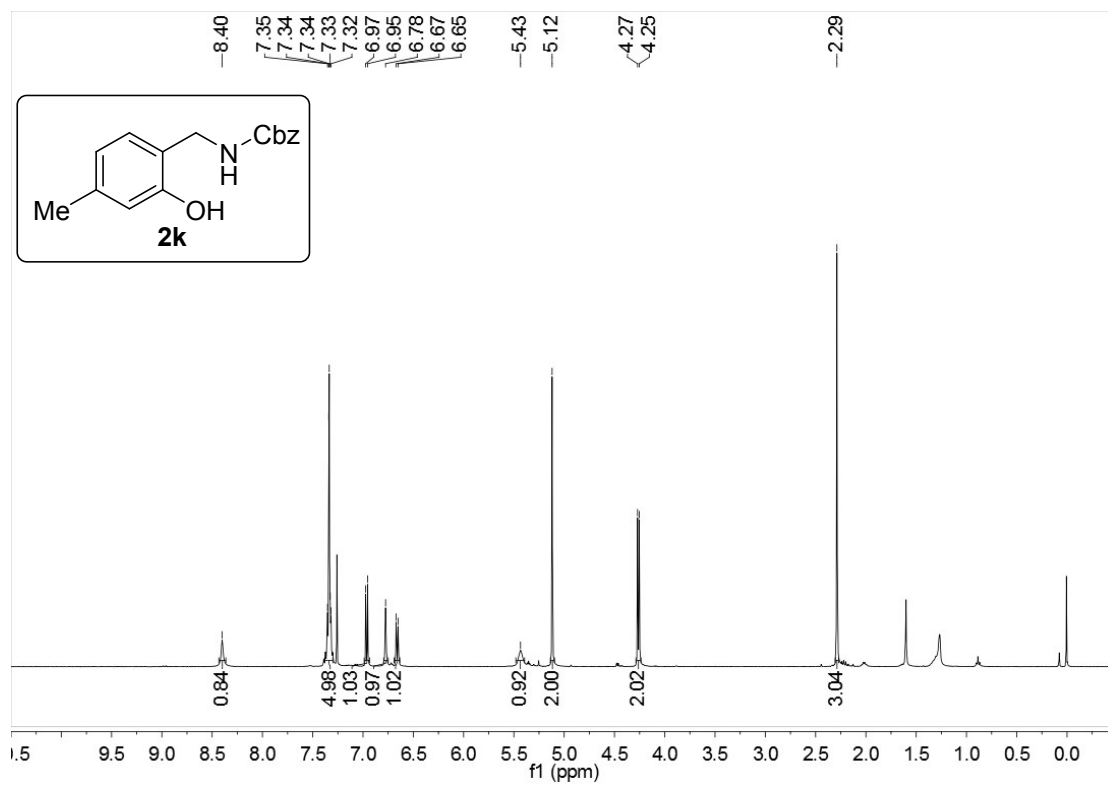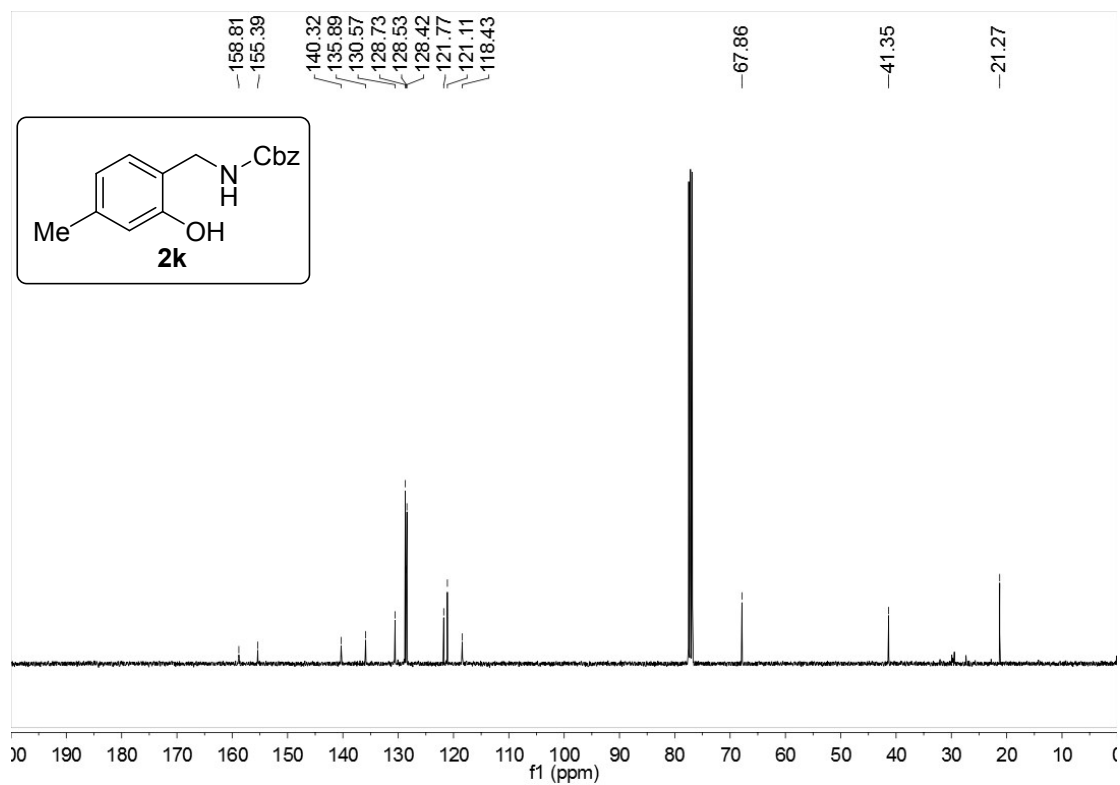

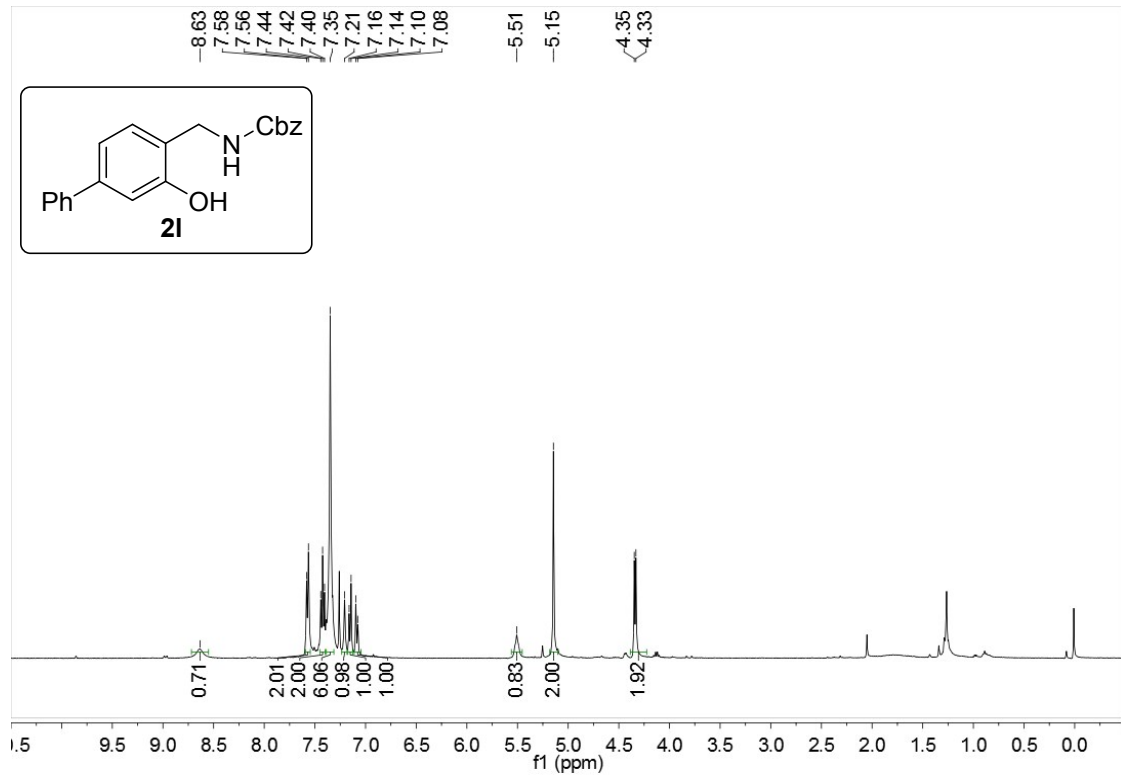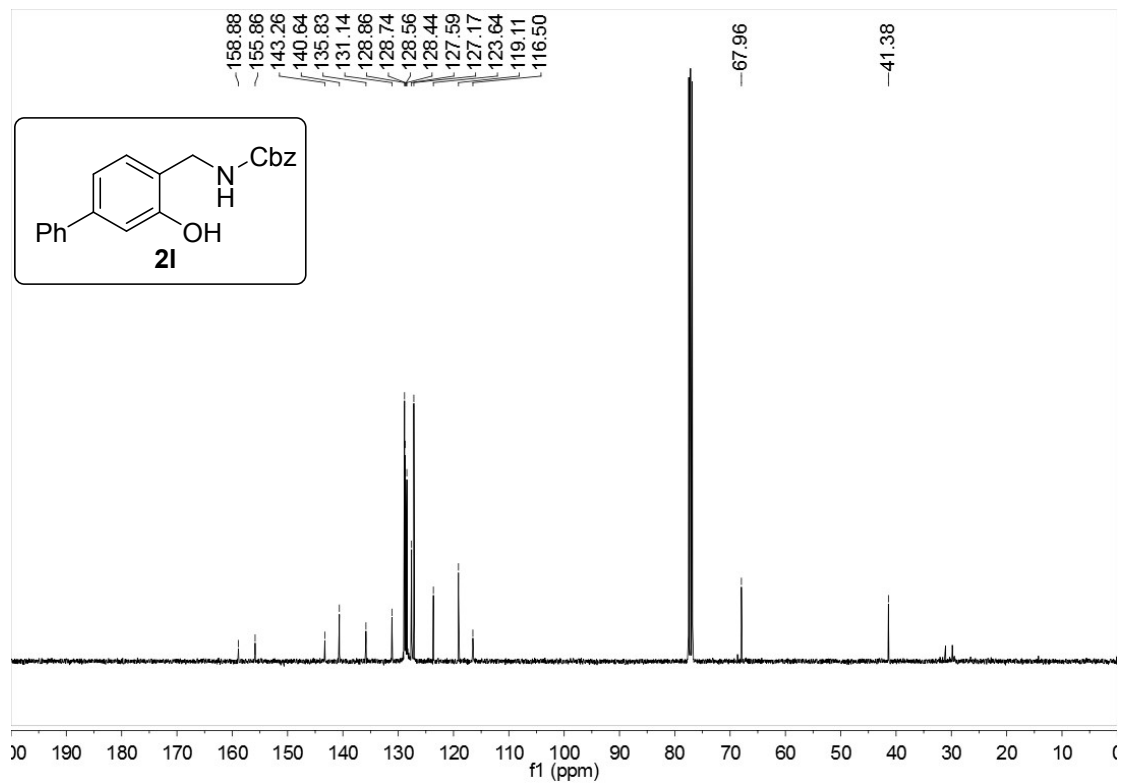

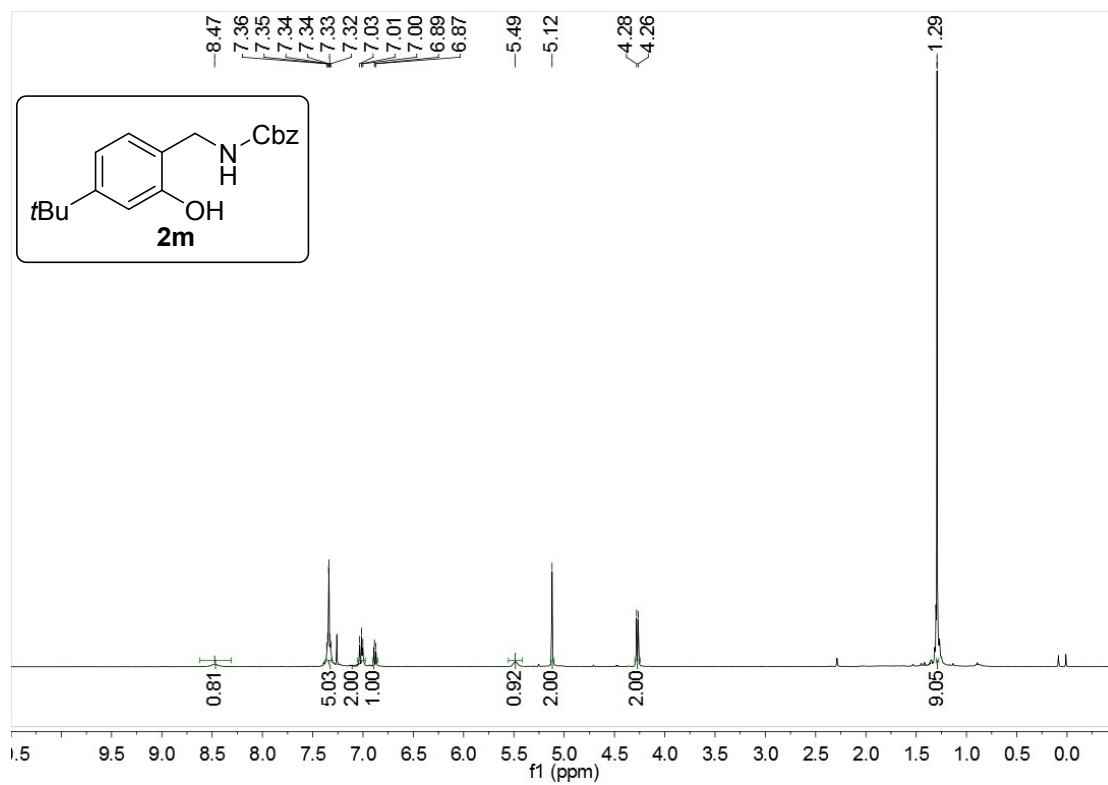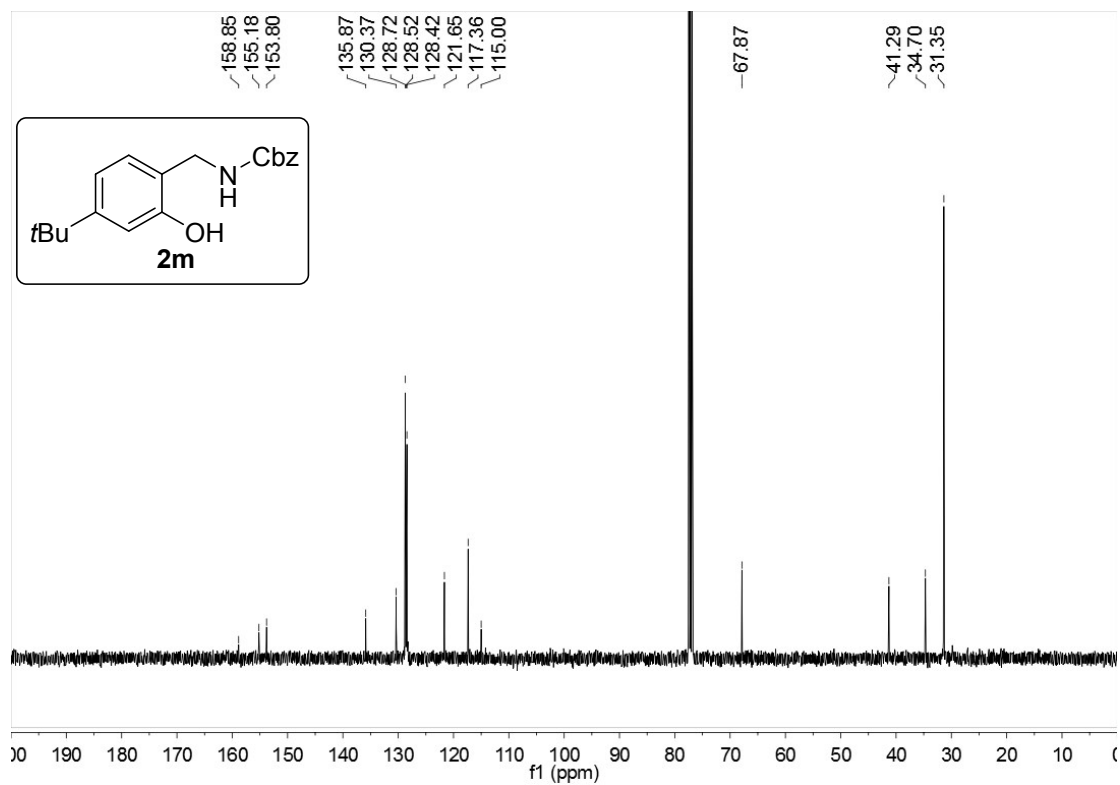

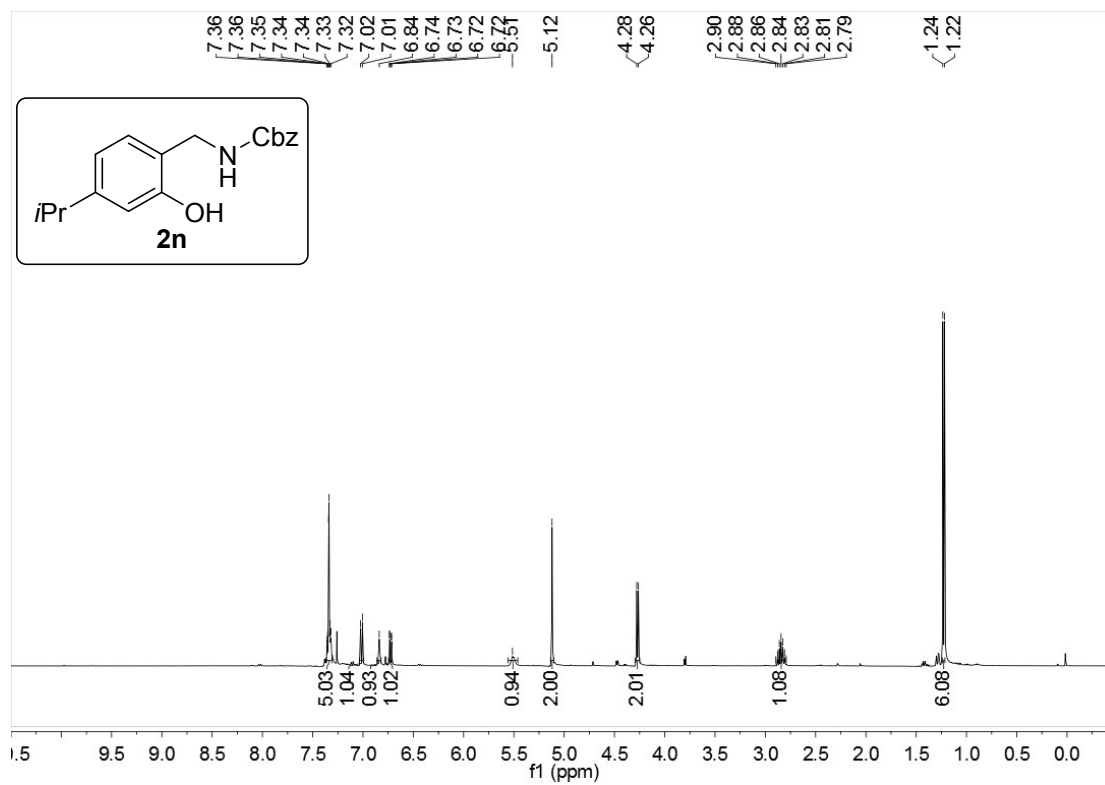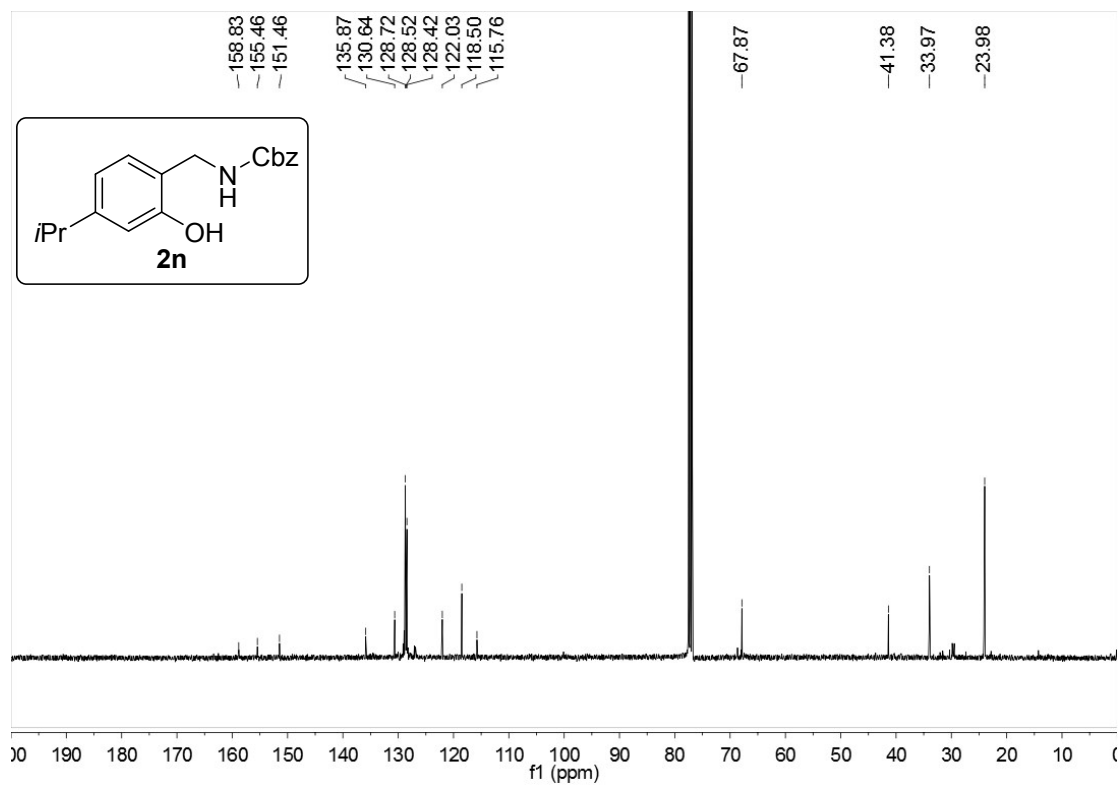

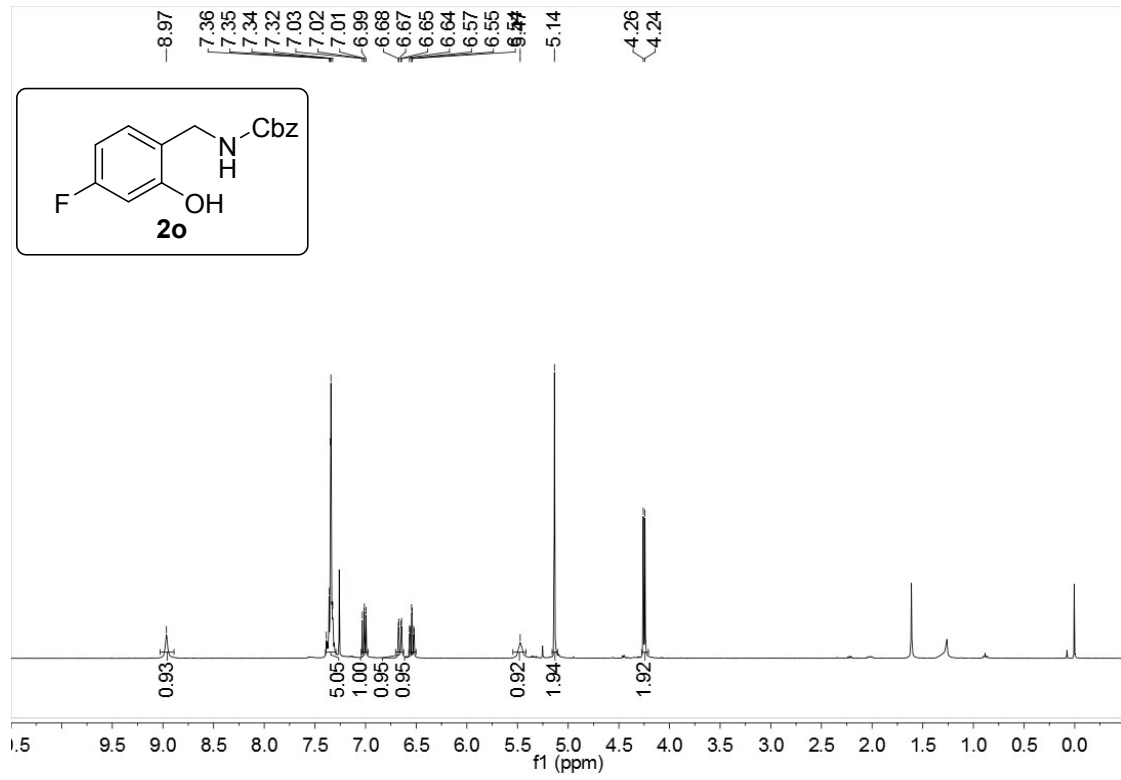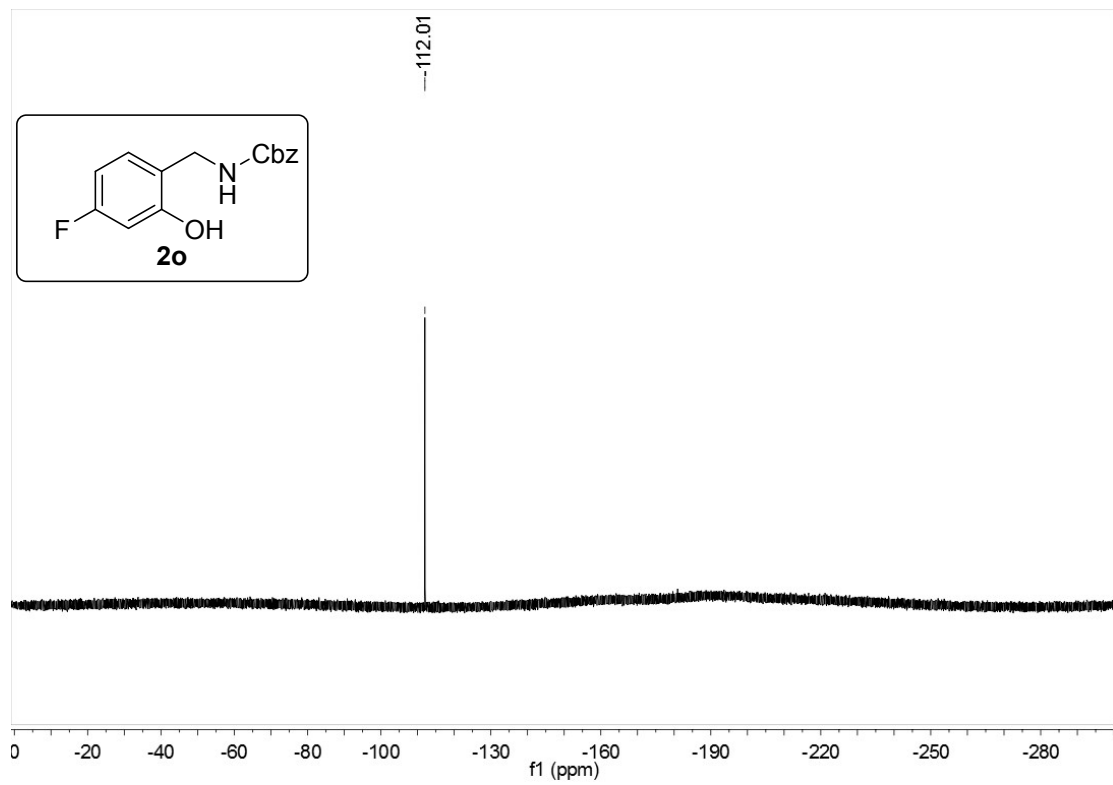

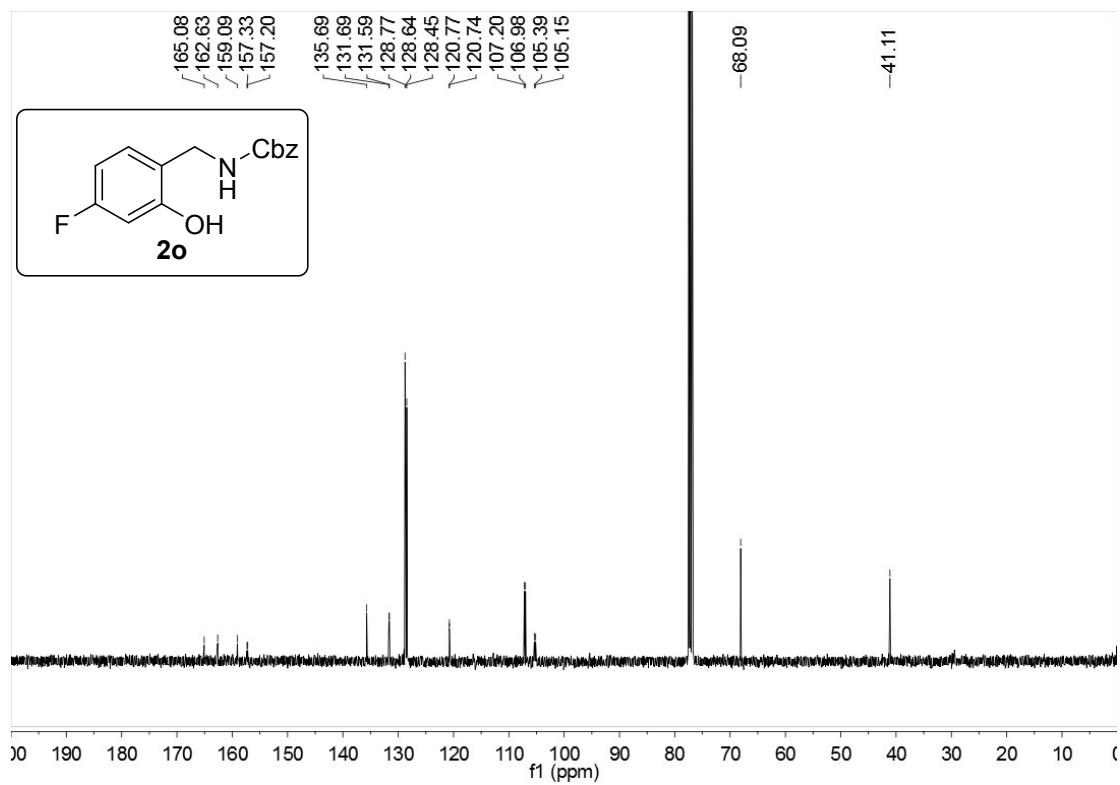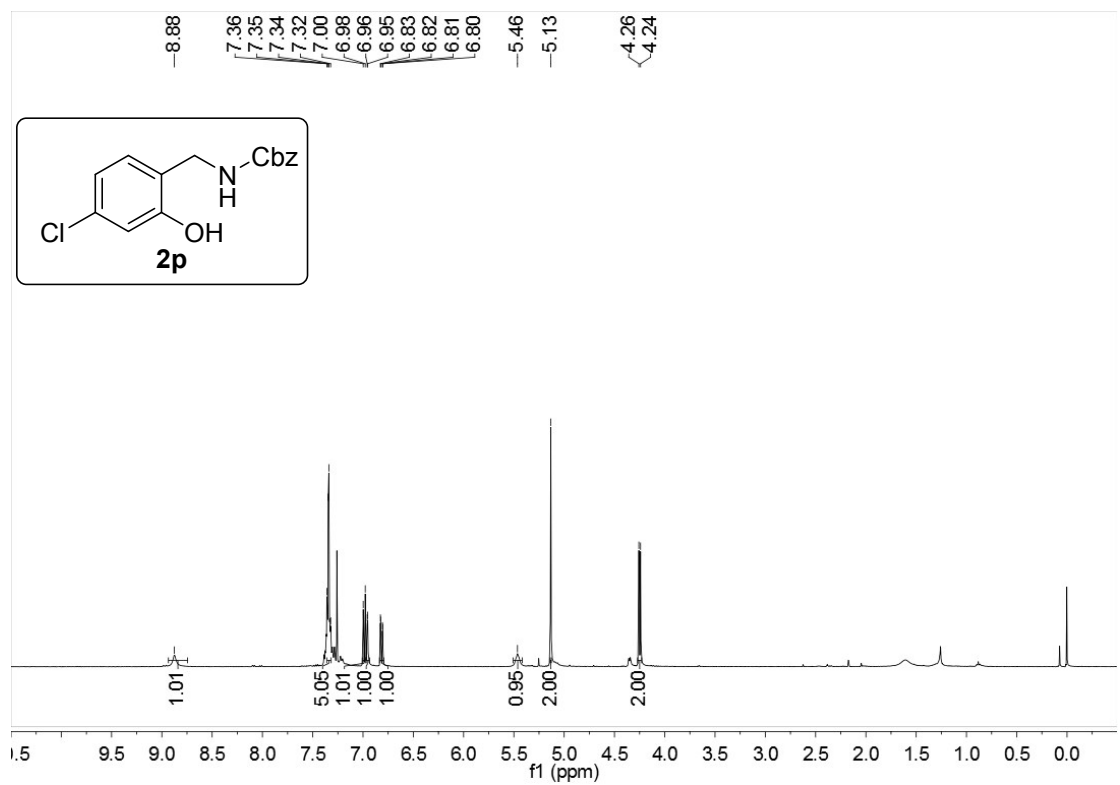

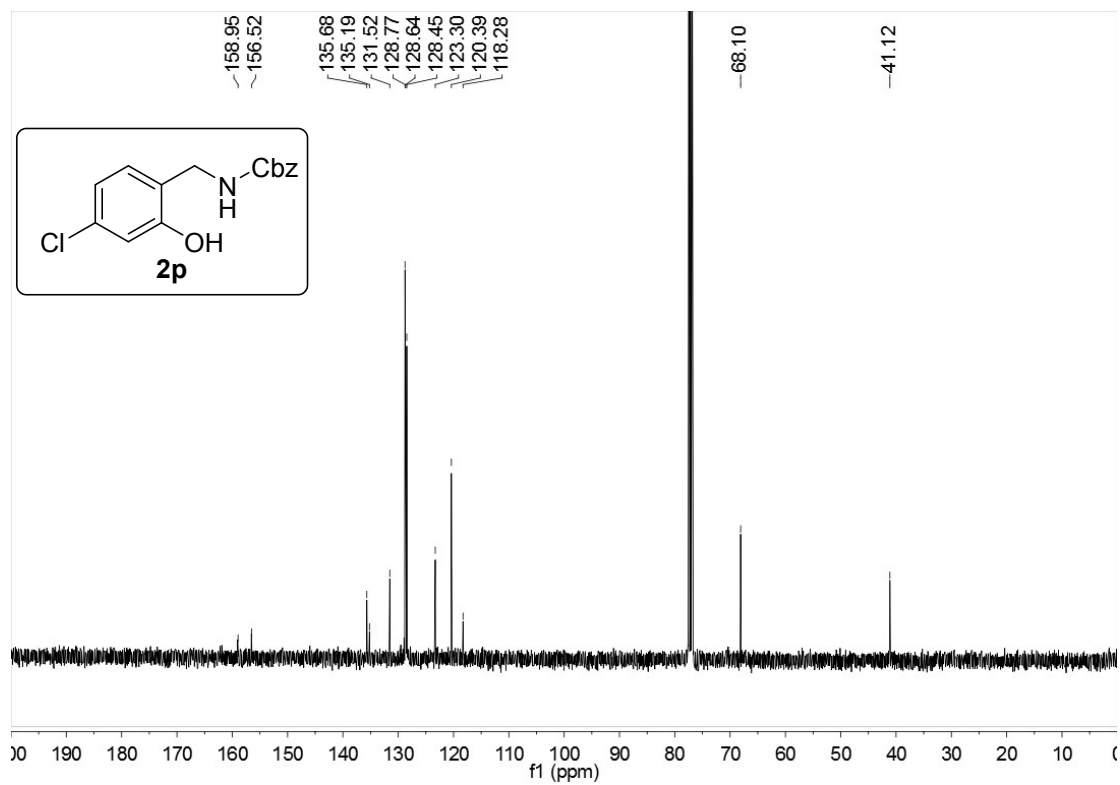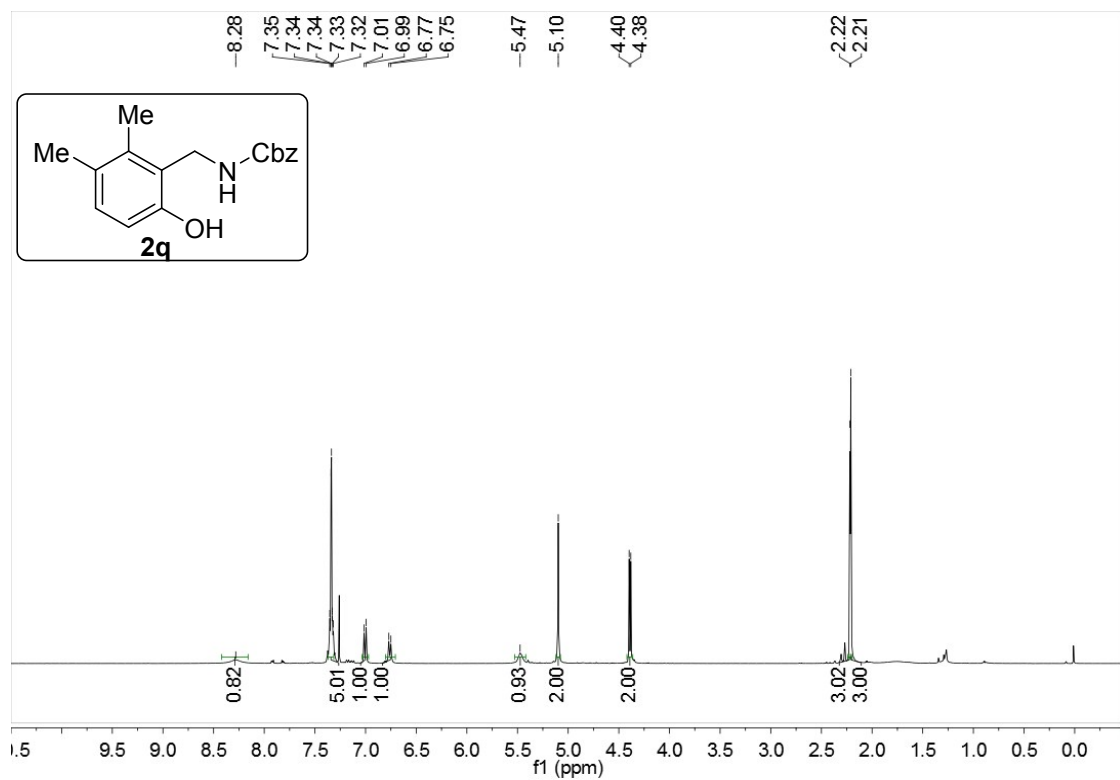

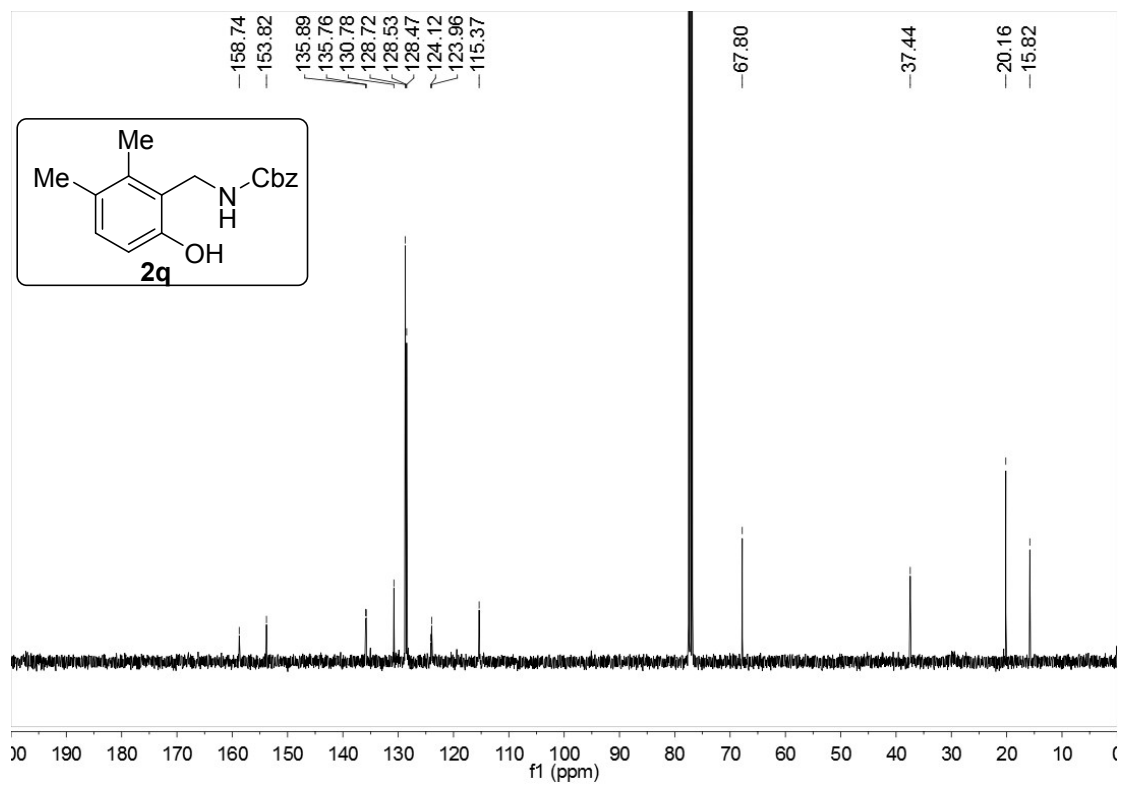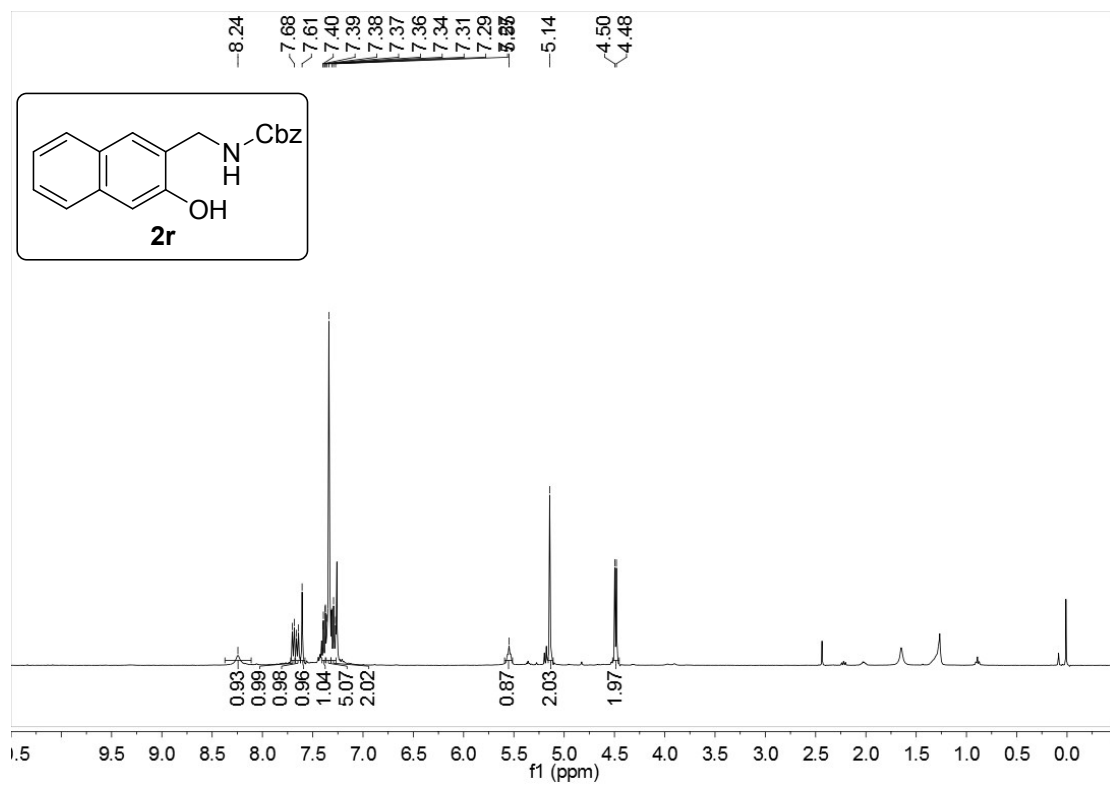



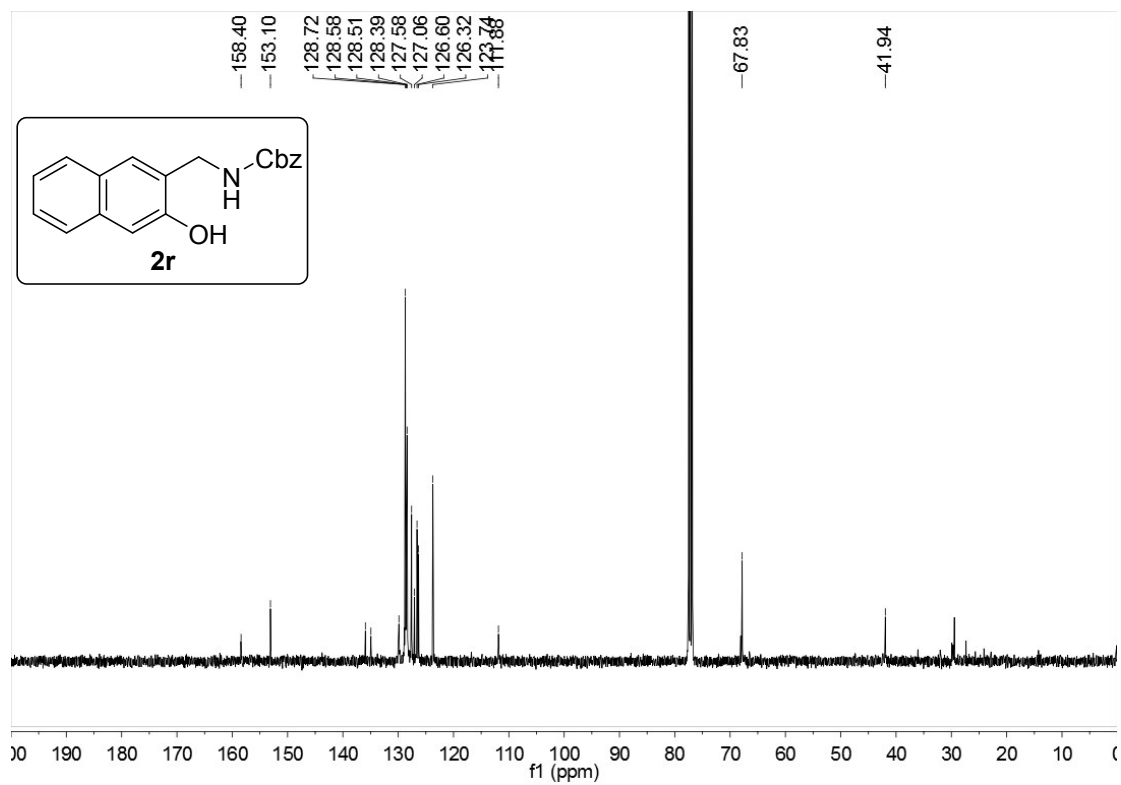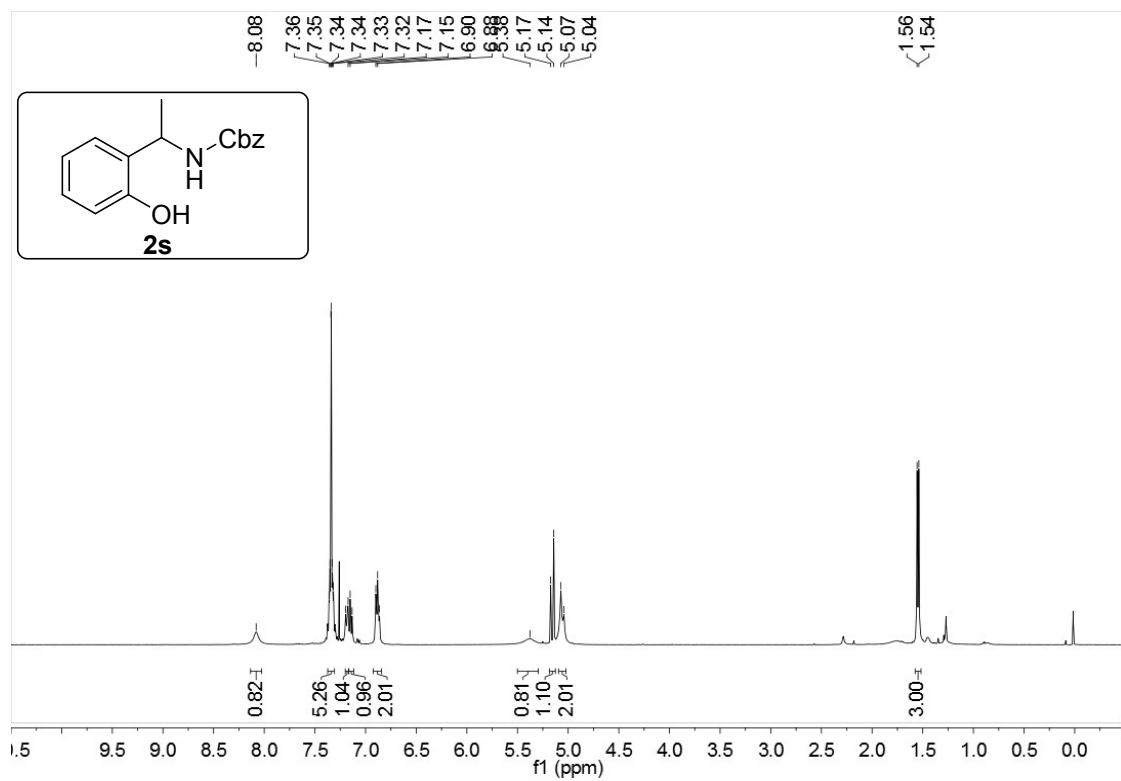

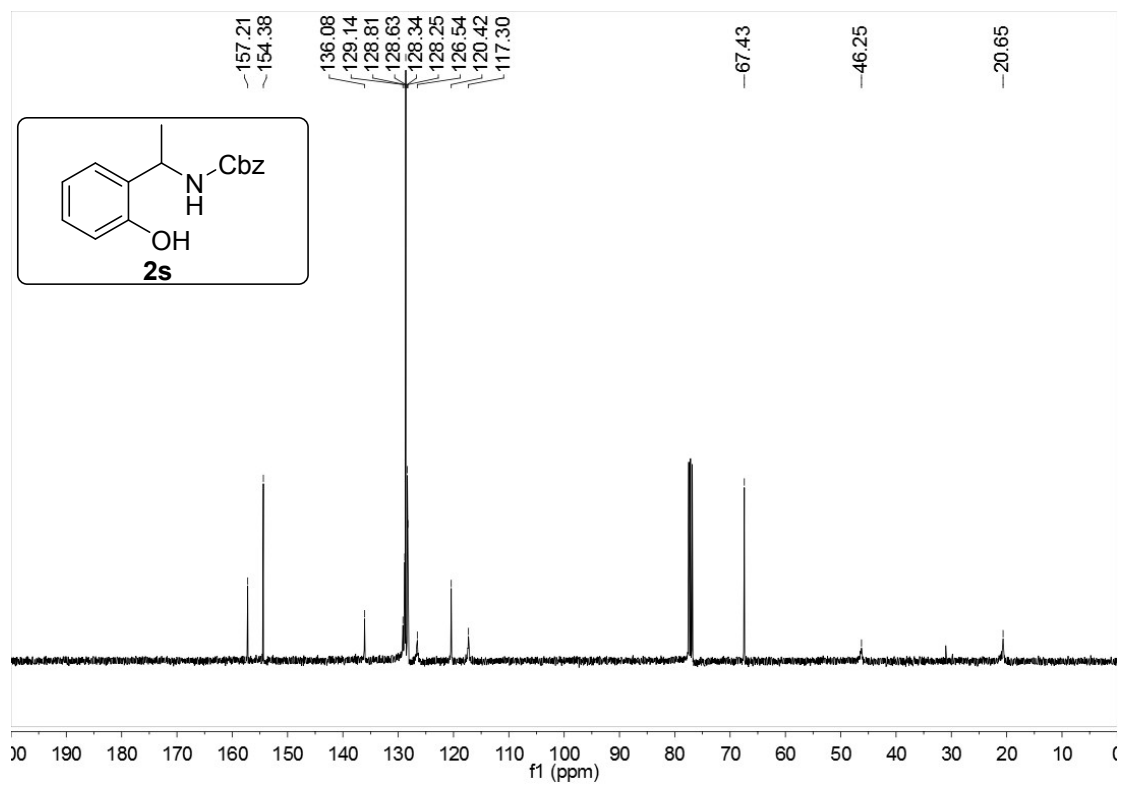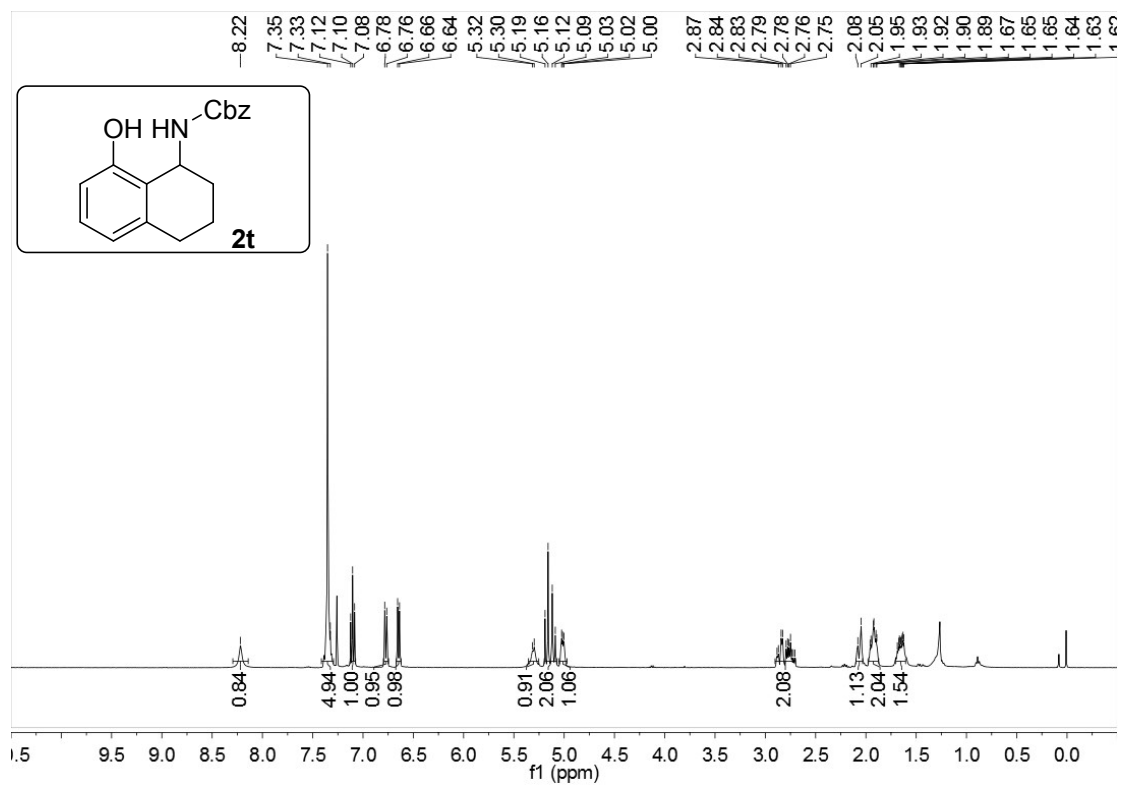

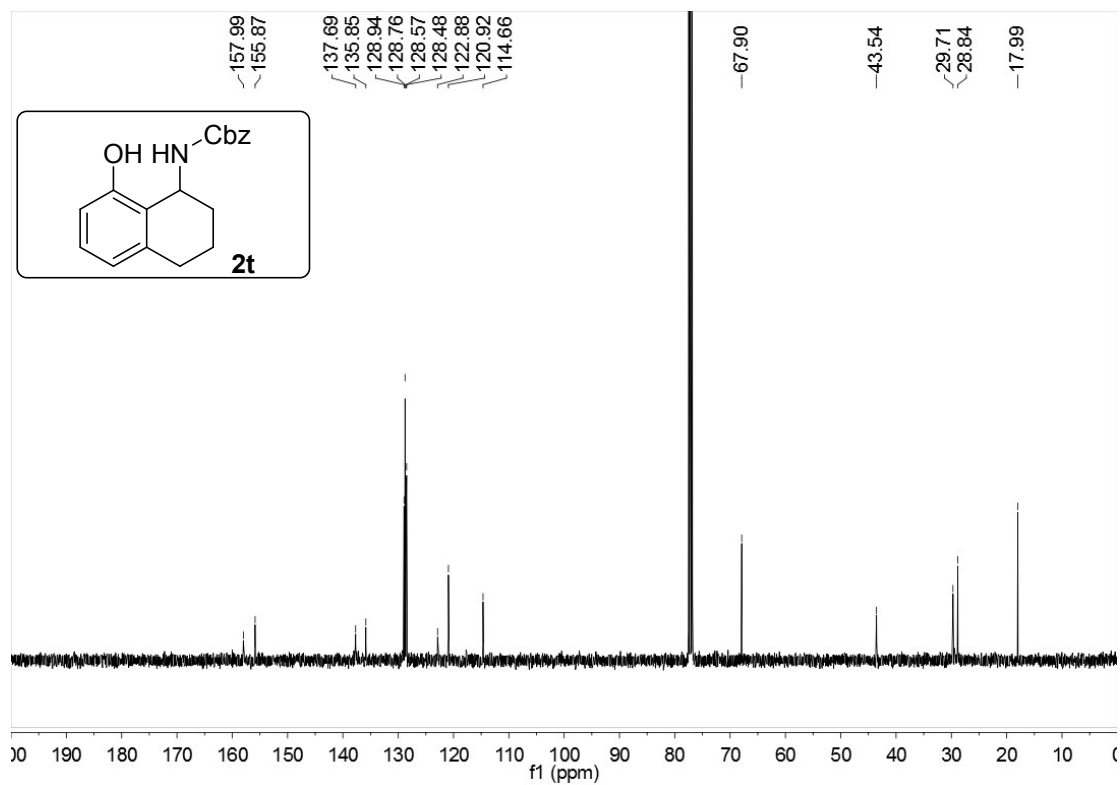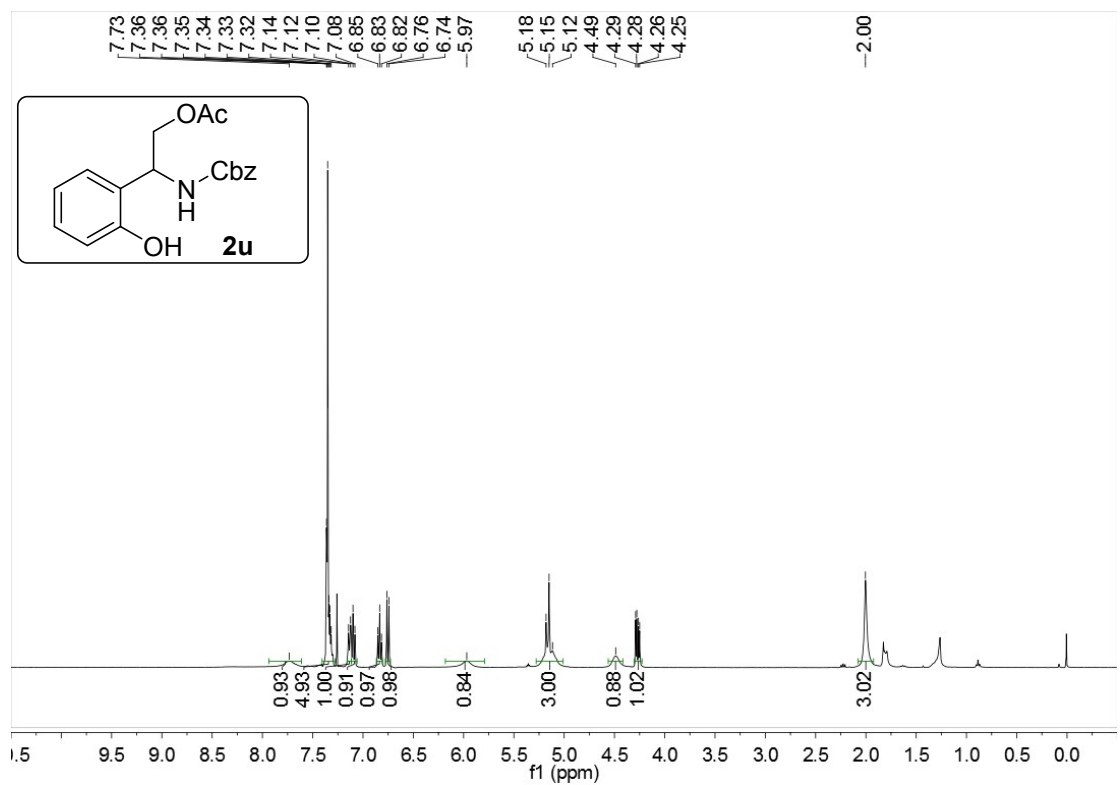

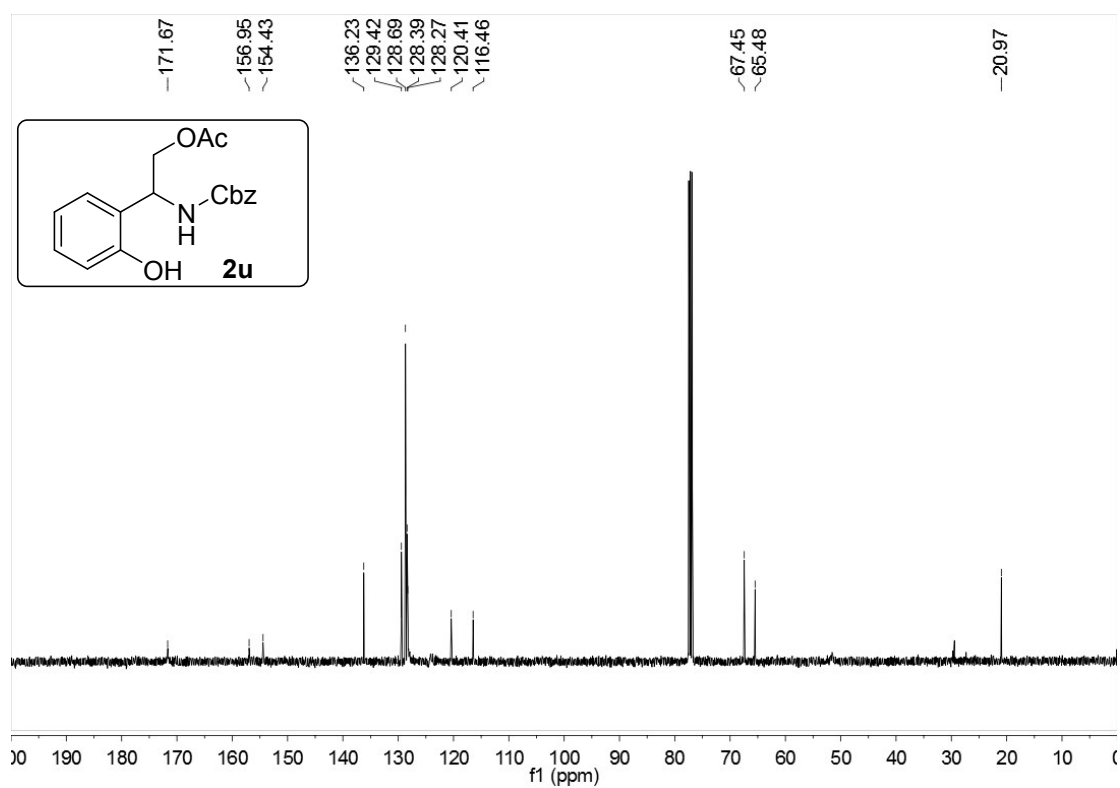

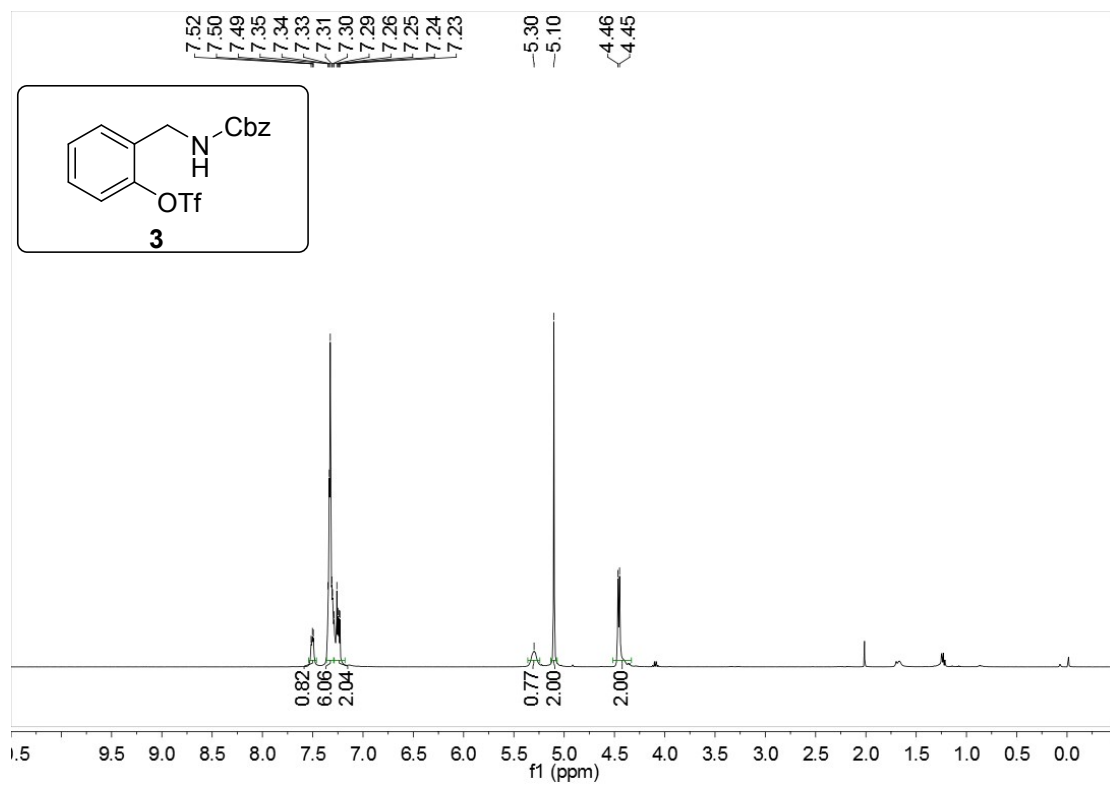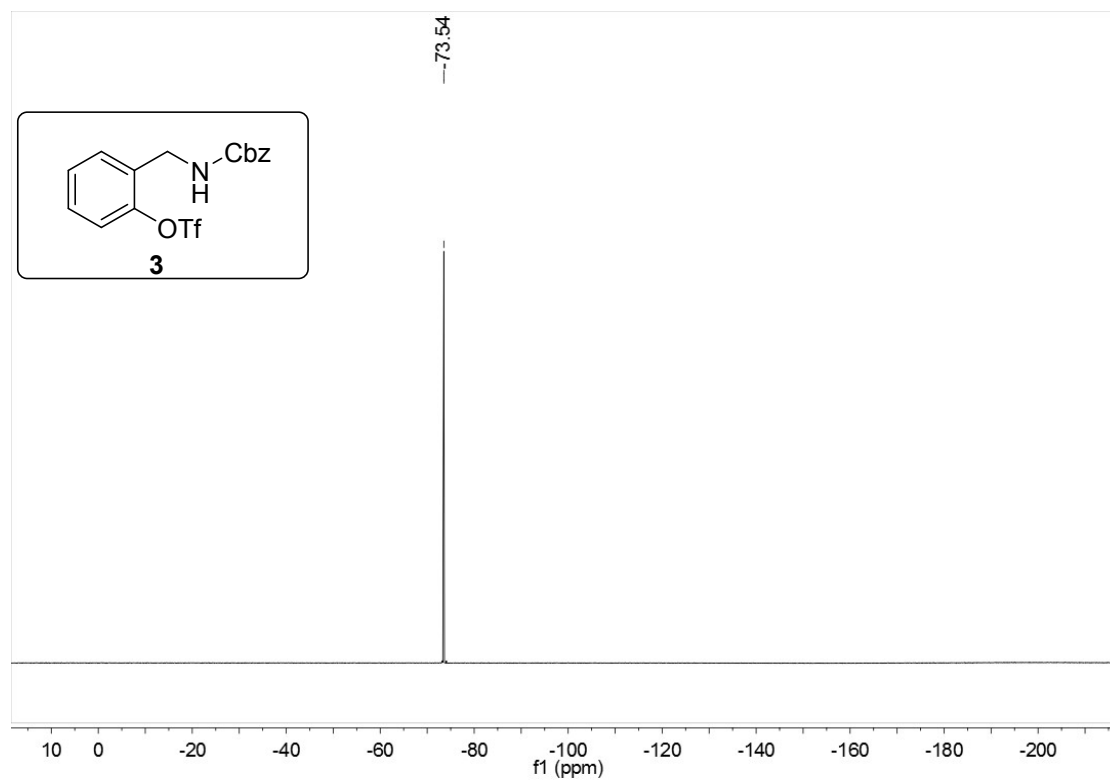

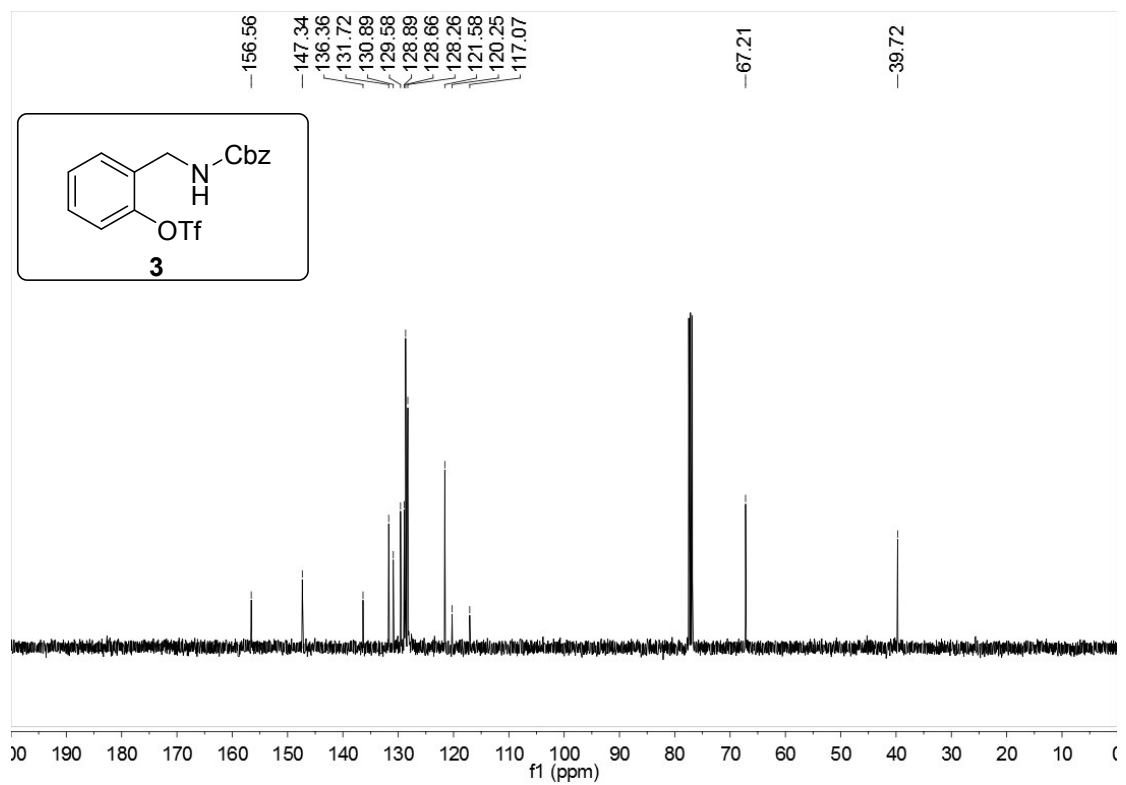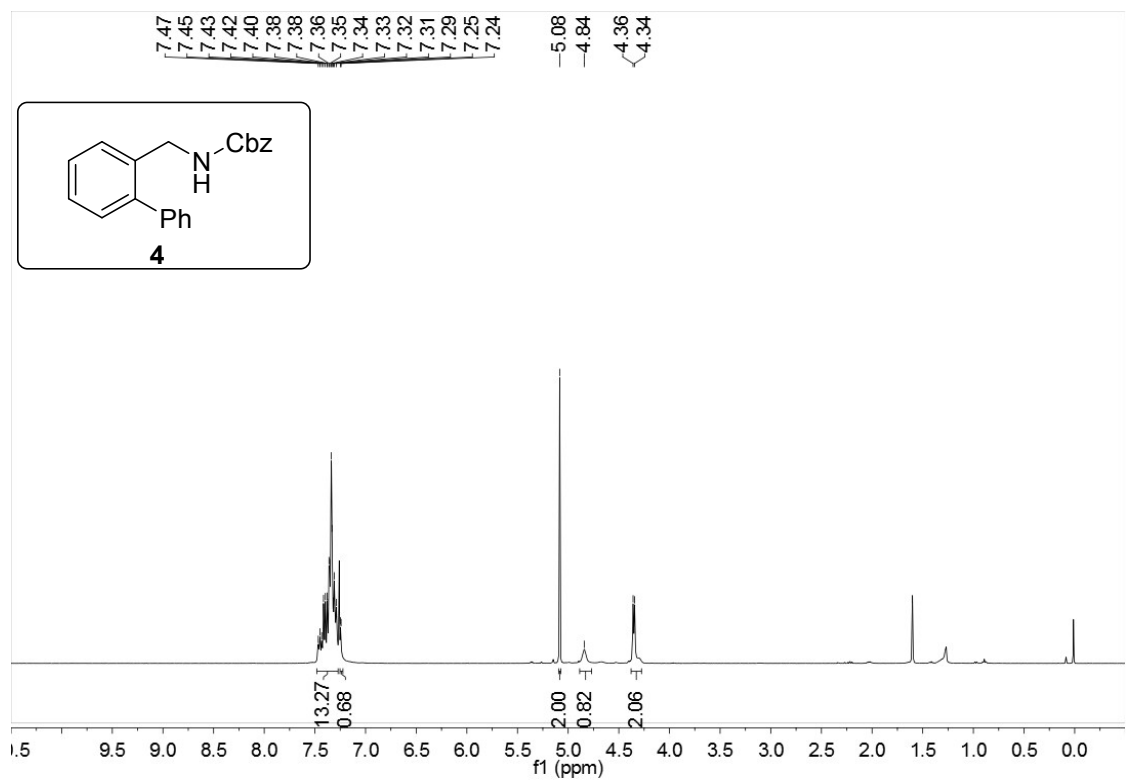

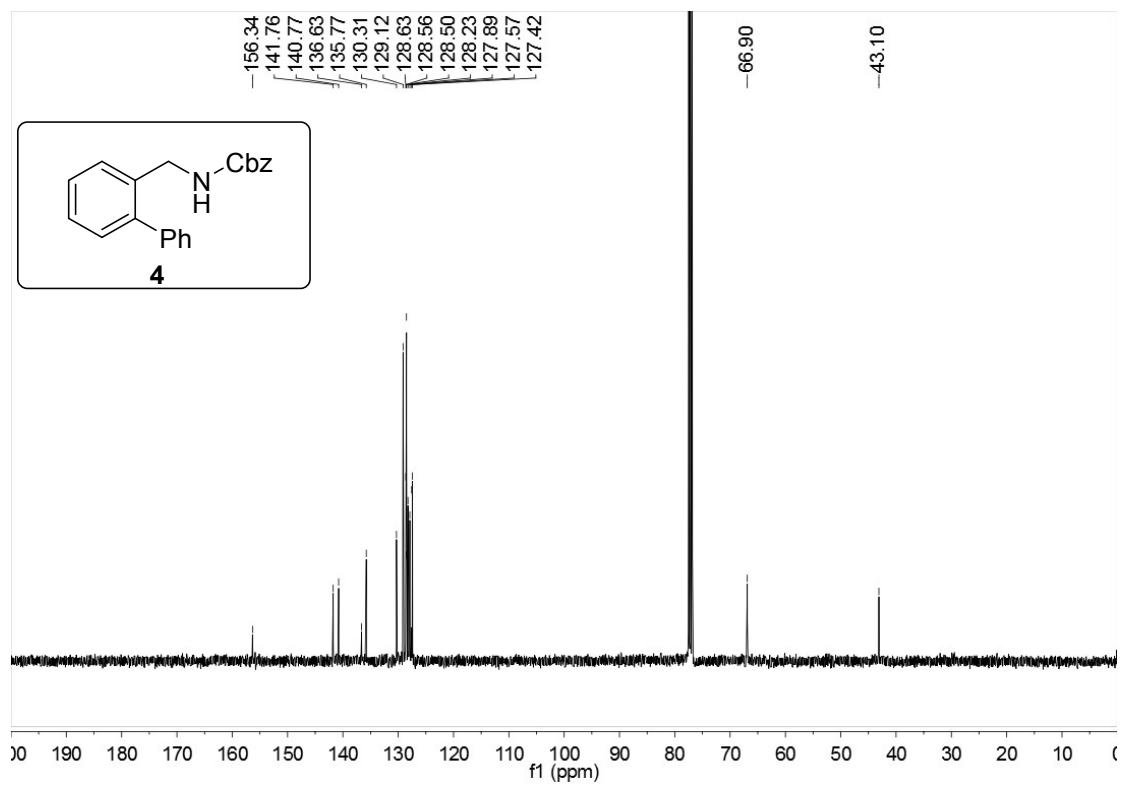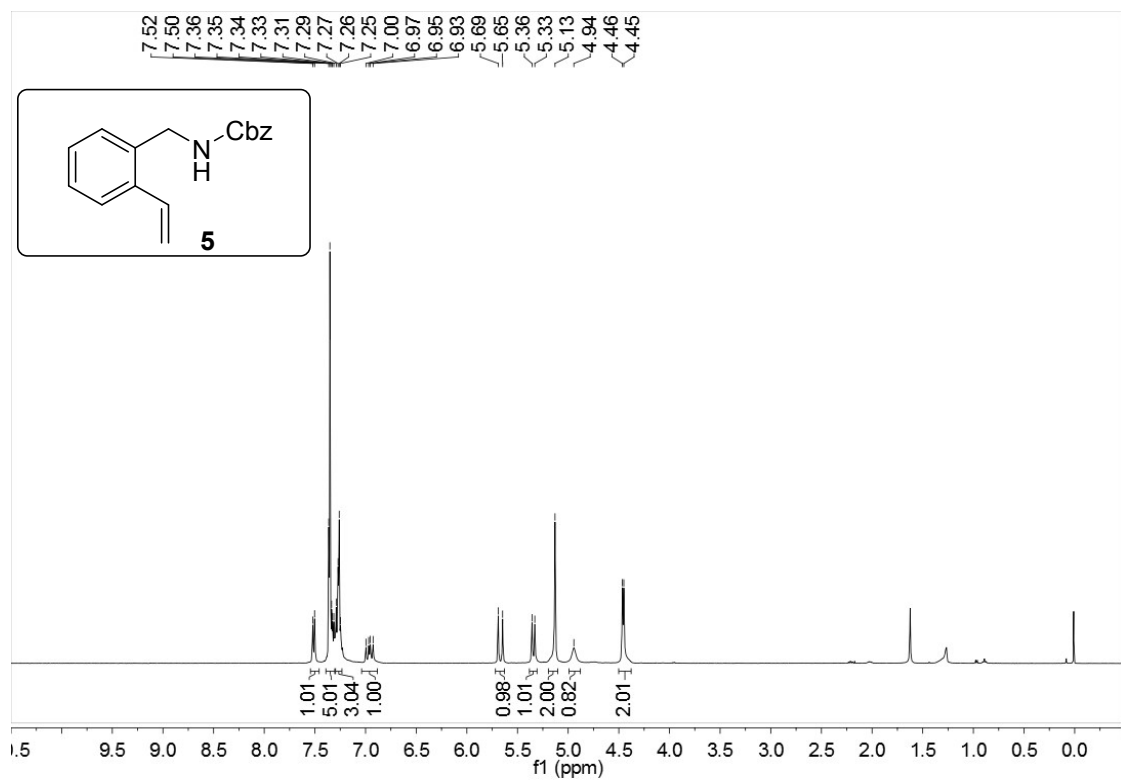

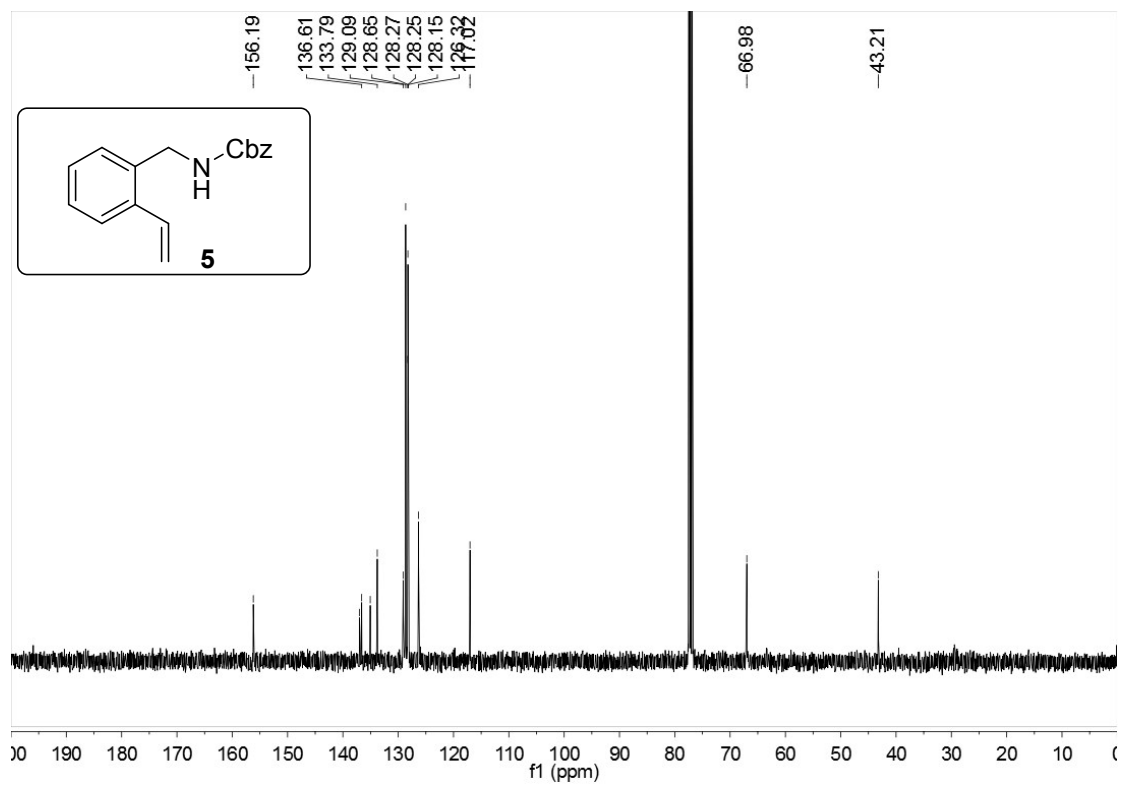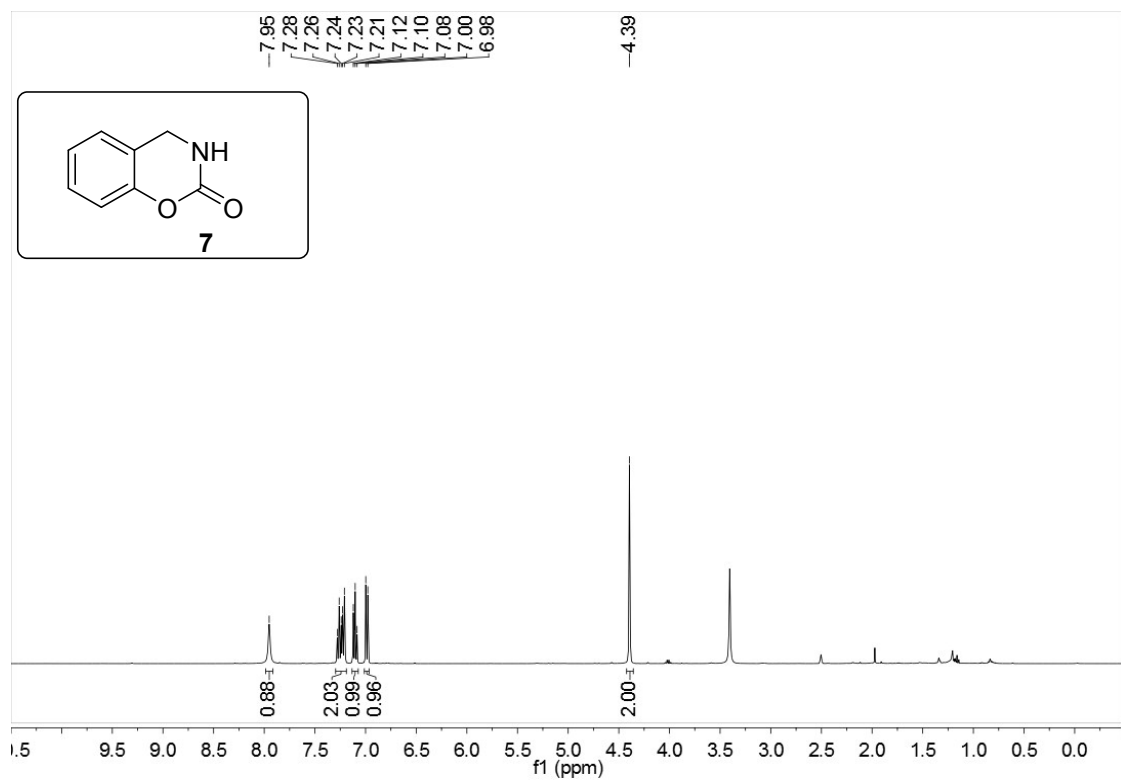



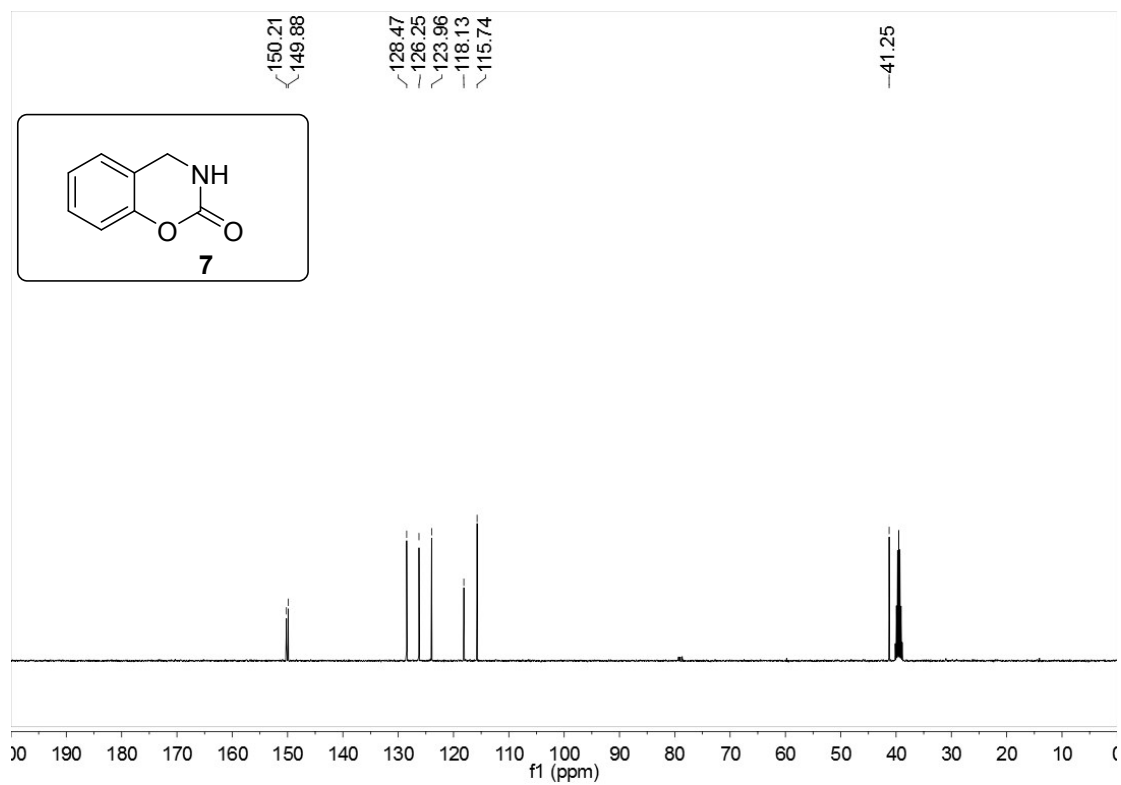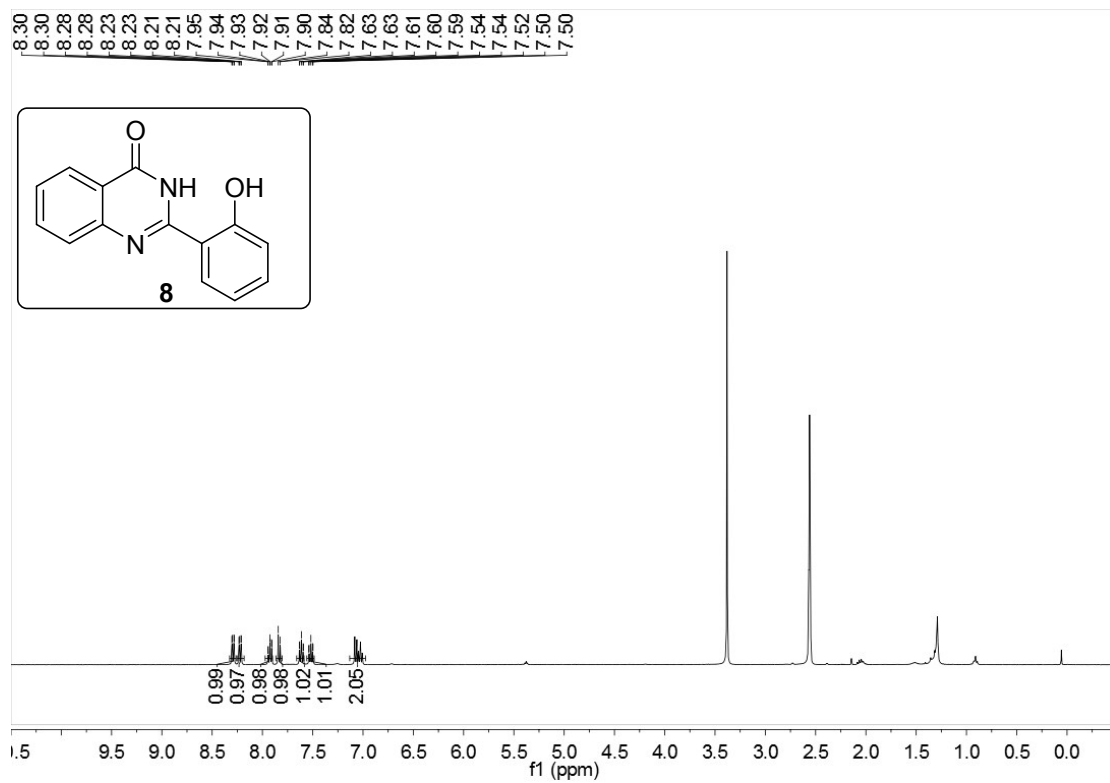

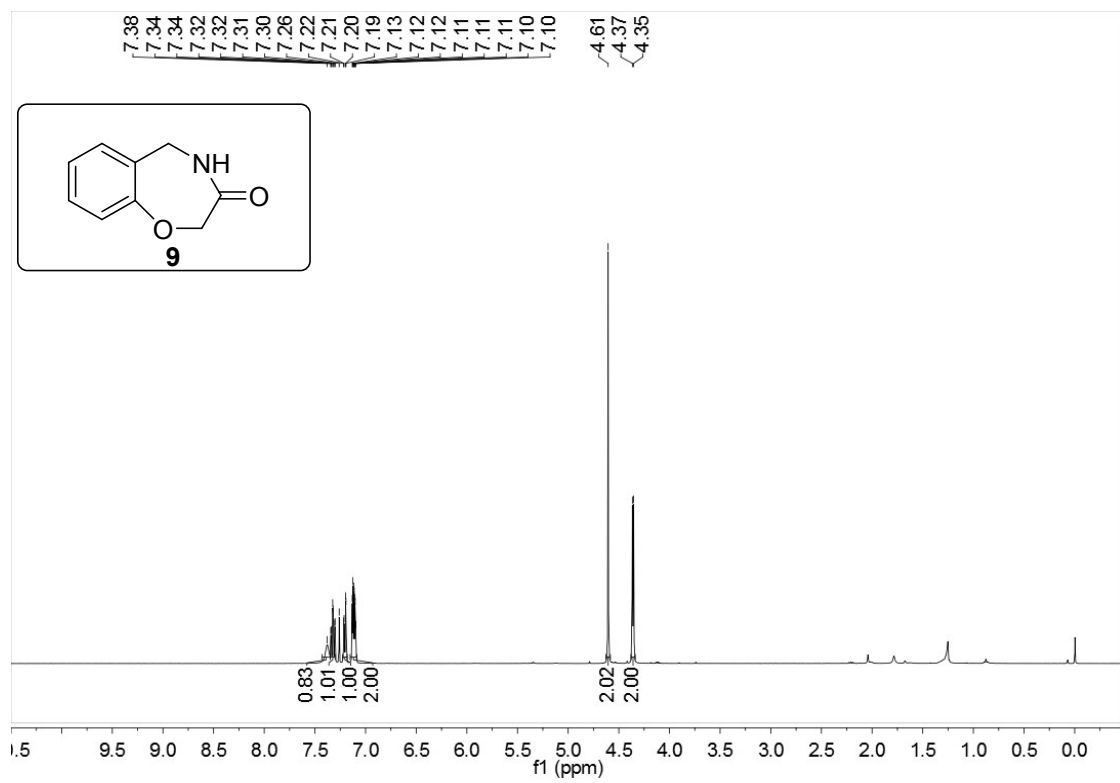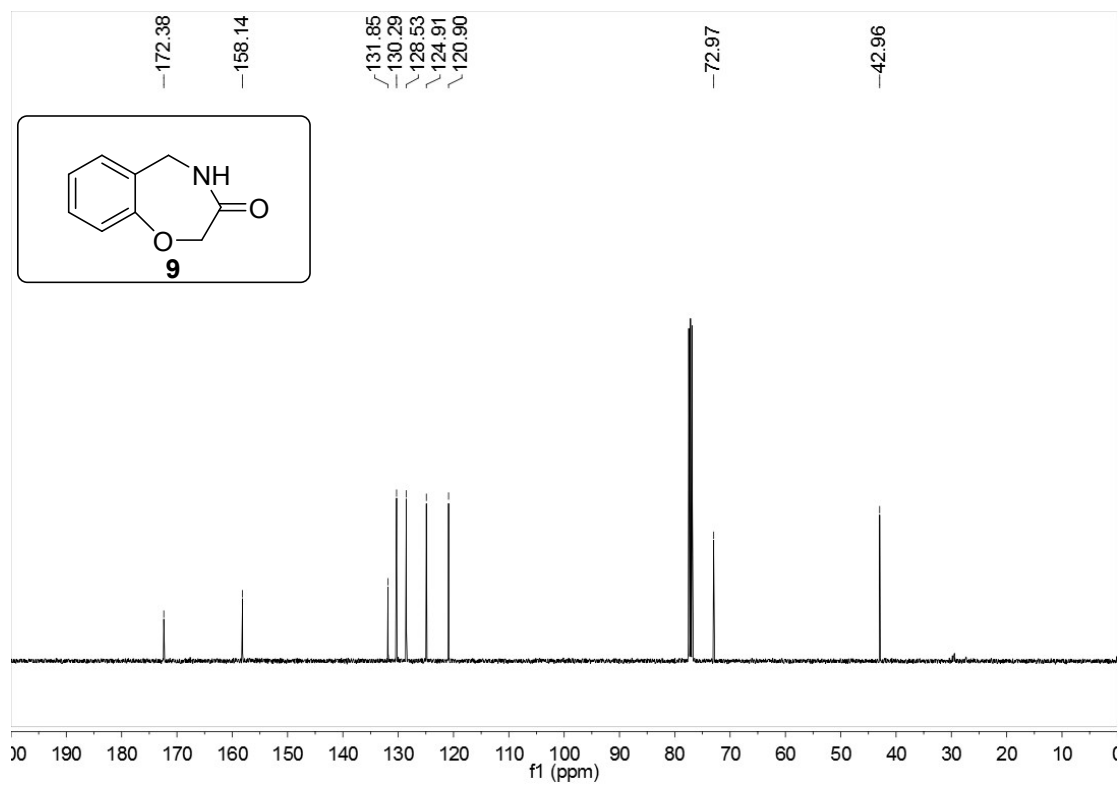

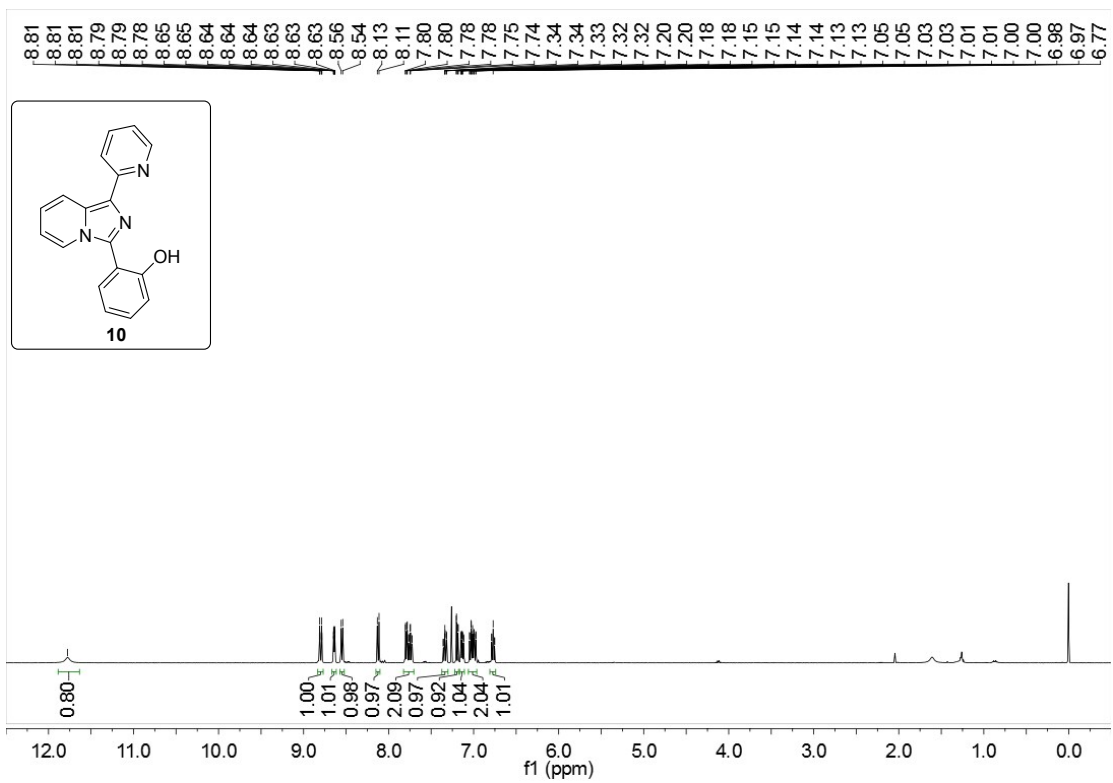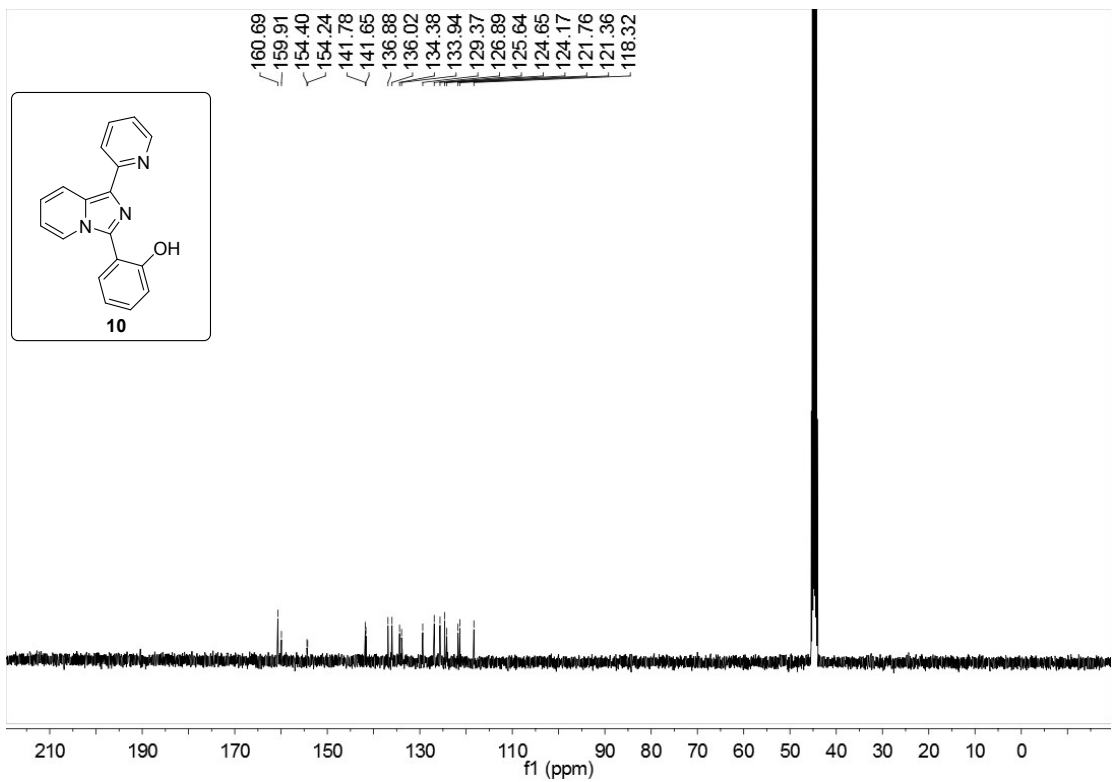

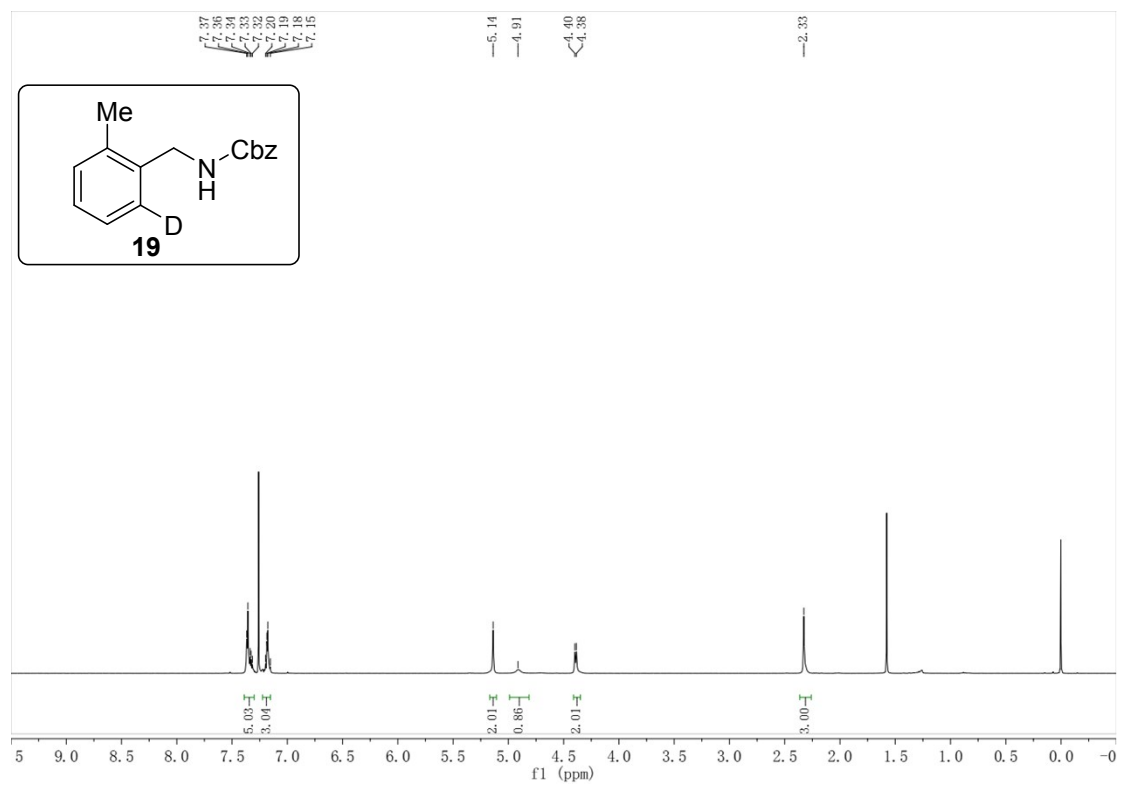

Supplement: c9qo01523j1.pdf [file c9qo01523j1.pdf]
